# Supplementary material
Source: Research Square preprint supplement (doi:10.21203/rs.3.rs-9586117/v1)
Supplement: Supplementary file 1 [file 62aea21fde4446fa307395c5.docx]

**Fig. S1. FKBP10 is elevated in BC and correlated with poor patient survival.**

**A** Kaplan-Meier plot depicting overall survival of BC patients with high (red) or low (black) gene expression using the online database. **B** Kaplan-Meier plot depicting progression-free survival of BC patients with high (red) or low (black) FKBP10 expression in GSE69031, GSE5327, GSE20711 and GSE9195 datasets. **C** Relative mRNA expression levels of FKBP10 in pan-cancer setting and non-cancerous tissues using TCGA database. **D** Relative mRNA expression levels of FKBP10 in BC tissues with different receptor status and non-cancerous breast tissues using TCGA database. Date represent mean ± SEM (one-way ANOVA). **E** The protein levels of FKBP10 in BC tissues with different receptor status and non-cancerous breast tissues in CPTAC database. **F** Correlation of FKBP10 mRNA levels with the pathological clinical stage in BC using TCGA database. Date represent mean ± SEM (one-way ANOVA). **G,** Correlation of FKBP10 protein levels with the pathological clinical stage in BC using CPTAC database.

**Fig. S2. Oncogenic role of FKBP10 in BC cells.** **A** qRT-PCR analysis of FKBP10 mRNA levels in FKBP10-knockdown MCF-7, T47D and MDA-MB-231 cells and their control cells. Data represent mean ± SEM of three biologically independent experiments (one-way ANOVA). **B** Western blottinganalysis of FKBP10 proteins in FKBP10-knockdown MCF-7, T47D and MDA-MB-231 cells and their control cells. **C** qRT-PCR analysis of FKBP10 mRNA levels in FKBP10-overexpressing MCF-7, T47D and DU4475 cells and their control cells. Data represent mean ± SEM of three biologically independent experiments (unpaired two-tailed Student’s t test). **D** Western blottinganalysis of FKBP10 proteins in FKBP10-overexpressing MCF-7, T47D and DU4475 cells and their control cells. **E, F** Representative images (**E**) and quantification (**F**) of colony formation assays in FKBP10-knockdown MCF-7, T47D and MDA-MB-231 cells and their control cells.Data represent mean ± SEM of three biologically independent experiments (one-way ANOVA). **G** Cell proliferation of FKBP10-knockdown MCF-7, T47D and MDA-MB-231 cells and their control cells was determined by MTT assays. Data represent mean ± SEM of three biologically independent experiments (two-way ANOVA). **H, I** Flow cytometry representative plots (**H**) and quantification (**I**) of cell apoptosis in FKBP10-knockdown MCF-7, T47D and MDA-MB-231 cells and their control cells. Data represent mean ± SEM of three biologically independent experiments. **J, K** Representative images (**J**) and quantification (**K**) of colony formation assays in FKBP10-overexpression and control MCF-7, T47D and DU4475 cells. Data represent mean ± SEM of three biologically independent experiments (one-way ANOVA). **L** The proliferation of FKBP10-overexpressing and control MCF-7, T47D and DU4475 cells was determined by MTT assays. Data represent mean ± SEM of three biologically independent experiments (two-way ANOVA).

**Fig. S3. The effect of FKBP10 knockdown or overexpression on mouse body weights.** **A, B** Body weight gain curves of FKBP10-knockdown (**A**) and -overexpressing (**B**) tumor-bearing mice and control mice. Body weights were measured every two days (n = 5 per group; two-way ANOVA).

**Fig. S4. FKBP10 protein levels in the indicated xenograft tumors. A**Western blottinganalysis (left panel) and quantification (right panel) of FKBP10 proteins in FKBP10-knockdown tumors and control tumors (n =5 per group; unpaired two-tailed Student’s t test). **B** Western blottinganalysis (left panel) and quantification (right panel) of FKBP10 proteins in FKBP10-overexpressing tumors and control tumors (n =5 per group; unpaired two-tailed Student’s t test).

**Fig. S5. FKBP10 knockdown inhibits HR repair capability of BC cells. A** Heatmap showing the Pearson correlation coefficient among FKBP10-knockdown MCF-7 cells and control cells. Color scale represents the strength and direction of correlation (red: positive; blue: negative).**B** Principal component analysis (PCA) of proteomics data showing distinct clustering of FKBP10-knockdown cells and control cells (n = 3 per group). **C** Volcano plot of differentially expressed genes (DEGs) between FKBP10-knockdown cells and control cells. Genes with |log2FC| > 1 and FDR-adjusted p-value < 0.05 (dashed lines) were considered significant. Red: 36 up-regulated genes; blue: 78 down-regulated genes. Top 5 DEGs are labeled. **D** Gene Ontology (GO) enrichment analysis of down-regulated genes in FKBP10-knockdown cells vs. control cells (n = 3 per group). **E, F** Representative images (**E**) and quantification (**F**) of γH2AX-foci staining (green) in FKBP10-knockdown T47D cells and control cells treated with 4 Gy IR for 4 h. Blue color represents DAPI staining (nuclei). Scale bar, 10 μm. Data represent mean ± SEM of three biologically independent experiments (one-way ANOVA). **G, H** Representative images (**G**) and quantification (**H**) of γH2AX-foci staining (green) in FKBP10-knockdown MDA-MB-231 cells and control cells treated with 4 Gy IR for 4 h. Blue color represents DAPI staining. Scale bar, 10 μm. Data represent mean ± SEM of three biologically independent experiments (one-way ANOVA). **I, J** Representative images (**I**) and quantification (**J**) of p-53BP1-foci staining (red) in FKBP10-knockdown T47D cells and control cells treated with 4 Gy IR for 4 h. Blue color represents DAPI staining. Scale bar, 10 μm. Data represent mean ± SEM of three biologically independent experiments (one-way ANOVA). **K, L** Representative images (**K**) and quantification (**L**) of p-53BP1-foci staining (red) in FKBP10-knockdown MDA-MB-231 cells and control cells treated with 4 Gy IR for 4 h. Blue color represents DAPI staining. Scale bar, 10 μm. Data represent mean ± SEM of three biologically independent experiments (one-way ANOVA). **M** Representative images (left panel) and quantification (right panel) of neutral comet assays in FKBP10-knockdown T47D (upper) and MDA-MB-231 (bottom) cells and control cells treated with 6 Gy IR for 24 h. Scale bar, 100 μm. Data represent mean ± SEM of three biologically independent experiments (one-way ANOVA). **N** Representative images of DR-GFP reporter assays in FKBP10-knockdown HEK293T cells and control cells (related to **Fig. 2M**). **P** Schematic illustration of NHEJ reporter assays (EJ5-GFP). **O, Q** Representative images (**O**) and quantification (**Q**) of EJ5-GFP reporter assays in FKBP10-knockdown HEK293T cells and control cells. Data represent mean ± SEM of three biologically independent experiments (one-way ANOVA).

**Fig. S6. FKBP10 deficiency sensitizes** **BC cells to DNA-damaging therapies. A** Cell viability in response to olaparib with the indicated concentrations for 48 h in FKBP10-knockdown MCF-7 cells and control cells. The IC50 values were calculated using GraphPad software. Data represent mean ± SEM of three biologically independent experiments. **B** Representative images (left) and quantification (right) of colony formation assays in FKBP10-knockdown MCF-7, T47D cells and control cells treated with or not cisplatin. Data represent mean ± SEM of three biologically independent experiments (one-way ANOVA). **C** Representative images (left) and quantification (right) of colony formation assays in FKBP10-knockdown MCF-7, T47D cells and control cells treated with or not olaparib. Data represent mean ± SEM of three biologically independent experiments (one-way ANOVA). **D, E** Representative images (**D**) and quantification (**E**) ofcellsurvival in FKBP10-knockdown MCF-7, T47D and MDA-MB-231 cells and control cells treated with IR at the indicated doses. **F** Representative images and quantification of IHC staining of γH2AX and Ki-67 in tumor tissues from **Fig. 2R**. The quantification analyses were based on AOD (one-way ANOVA). Scale bar, 100 μm.**G** Representative images and quantification of IHC staining of γH2AX and Ki-67 in tumor tissues from **Fig. 2****U**. The quantification analyses were based on AOD (one-way ANOVA). Scale bar, 100 μm. **H** Representative images and quantification of IHC staining of γH2AX and Ki-67 in tumor tissues from **Fig. 2W**. The quantification analyses were based on AOD (unpaired two-tailed Student’s t test). Scale bar, 100 μm.

**Fig. S7. FKBP10 prevents the lysosomal degradation of RAD51. A** qRT-PCR was performed to detect mRNA levels of RAD51 in FKBP10-knockdown MCF-7, T47D and MDA-MB-231 cells and control cells. Data represent mean ± SEM of three biologically independent experiments (one-way ANOVA). **B** qRT-PCR was performed to determine mRNA levels of RAD51 in FKBP10-overexpressing MCF-7, T47D and DU4475 cells and control cells. Data represent mean ± SEM of three biologically independent experiments (one-way ANOVA). **C, D** Western blottinganalysis of FKBP10 and RAD51 proteins (left panel) and quantification of RAD51 proteins (right panel) in FKBP10-knockdown (**C**) or -overexpressing (**D**) tumors and their control tumors (n = 5 per group; unpaired two-tailed Student’s t test). **E** Representative images (left panel) and quantification (right panel) of RAD51 nuclear foci (yellow) in FKBP10-knockdown T47D and MDA-MB-231 cells and control cells at 4 h after 4 Gy IR treatment. Blue color represents DAPI staining. Scale bar, 10 μm. Data represent mean ± SEM of three biologically independent experiments (one-way ANOVA). **F, G** Western blotting analysis of FKBP10 and RAD51 proteins (**F**) and quantification of RAD51 proteins (**G**) in FKBP10-knockdown T47D and MDA-MB-231 cells treated with 100 μM CHX for the indicated times. **H, I** Western blotting analysis of Flag-FKBP10 and RAD51 proteins (**H**) and quantification of RAD51 proteins (**I**) in FKBP10-overexpressing T47D and MDA-MB-231 cells and their control cells treated with 100 μM CHX for the indicated times. **J, K** Western blotting analysis of FKBP10 and RAD51 proteins (**J**) and quantification of RAD51 proteins (**K**) in MCF-7, T47D and MDA-MB-231 cells and their control cells treated with or not 20 μM MG132 for 2 h. Data represent mean ± SEM of three biologically independent experiments (one-way ANOVA). **L** MCF-7, T47D and MDA-MB-231 cells were subjected to CQ treatment with the indicated doses for 12 h. Cell lysates were immunoblotted with the indicated antibodies. **M** Western blotting analysis of Flag-FKBP10 and RAD51 proteins (left panel) and quantification of RAD51 proteins (right panel) in FKBP10-overexpressing T47D and DU4475 cells and their control cells treated with or not N/L (20 mM NH4Cl and 100 μM leupeptin) for 12 h. Data represent mean ± SEM of three biologically independent experiments (unpaired two-tailed Student’s t test). **N, O** Western blotting analysis of FKBP10 and RAD51 proteins (**N**) and quantification of RAD51 proteins (**O**) in FKBP10-knockdown T47D and MDA-MB-231 cells and control cells treated with or not N/L (the same condition as panel **M**) for 12 h. The degradation rate of RAD51 proteins was calculated as above. Data represent mean ± SEM of three biologically independent experiments (unpaired two-tailed Student’s t test). **P, Q** Western blotting analysis of the indicated proteins (**P**) and quantification of RAD51 proteins (**Q**) in MCF-7, T47D and MDA-MB-231 cells treated with 3-Methyladenine (3-MA) at the indicated concentrations for 12 h. Data represent mean ± SEM of three biologically independent experiments (one-way ANOVA). **R, S** Western blotting analysis of FKBP10 and RAD51 proteins (**R**) and quantification of RAD51 proteins (**R**) in FKBP10-knockdown MCF-7, T47D and MDA-MB-231 cells and control cells treated with or not 5 mM 3-MA for 12 h. Data represent mean ± SEM of three biologically independent experiments (one-way ANOVA).

**Fig. S8. FKBP10 deficiency induces CMA-mediated degradation of RAD51. A, B** Western blotting analysis of Flag-FKBP10 and RAD51 proteins (left panel) and quantification of RAD51 proteins (right panel) in FKBP10-overexpressing T47D (**A**) and MDA-MB-231(**B**) cells and their control cells treated with serum starvation for the indicated times. **C** Western blotting analysis of the indicated proteins (left panel) and quantification of RAD51 proteins (right panel) in T47D and MDA-MB-231 cells with knockdown of FKBP10 and LAMP2A alone or in combination. Data represent mean ± SEM of three biologically independent experiments (unpaired two-tailed Student’s t test). **D, E** Western blotting analysis of the indicated proteins (left panel) and quantification of RAD51 proteins (right panel) in T47D (**D**) and MDA-MB-231 (**E**) cells with knockdown of FKBP10 and LAMP2A alone or in combination and treated with 100 μM CHX for the indicated times. **F** Western blotting analysis of the indicated proteins (left panel) and quantification of RAD51 proteins (right panel) in T47D and MDA-MB-231 cells with knockdown of FKBP10 and HSC70 alone or in combination. Data represent mean ± SEM of three biologically independent experiments (unpaired two-tailed Student’s t test). **G, H,** Western blotting analysis of the indicated proteins (left panel) and quantification of RAD51 proteins (right panel) in T47D (**G**) and MDA-MB-231 (**H**) cells with knockdown of FKBP10 and HSC70 alone or in combination and treated with 100 μM CHX for the indicated times. **I** Western blotting analysis of the indicated proteins (left panel) and quantification of RAD51 proteins (right panel) in FKBP10-knockdown T47D and MDA-MB-231 cells and their control cells treated with or not 10 μM VER-155008 (VER) for 12 h. Data represent mean ± SEM of three biologically independent experiments (unpaired two-tailed Student’s t test). **J-L** Western blotting analysis of the indicated proteins (left panel) and quantification of RAD51 proteins (right panel) in FKBP10-knockdown MCF-7 (**J**), T47D (**K**) and MDA-MB-231 (**L**) cells and their control cells treated with 10 μM VER-155008 and 100 μM CHX as indicated.

**Fig. S9. FKBP10 depends on its PPIase activity to interact with and stabilize RAD51. A** FKBP10-overexpressing T47D cells and control cells were transfected with Myc-RAD51 for 48 h, and then subjected to IP and immunoblotting analysis with the indicated antibodies. **B** FKBP10-knockdown T47D cells and control cells were transfected with Myc-RAD51 for 48 h, and then subjected to IP and immunoblotting analysis with the indicated antibodies. **C** Western blotting analysis of Flag-FKBP10 and RAD51 proteins (left panel) and quantification of RAD51 proteins (right panel) in FKBP10-deficient T47D cells transfected with Flag-FKBP10-WT or Flag-FKBP10-8FY for 48 h. Data represent mean ± SEM of three biologically independent experiments (one-way ANOVA). **D, E** Western blotting analysis of Flag-FKBP10 and RAD51 proteins (**D**) and quantification of RAD51 proteins (**E**) in Flag-FKBP10-WT- or Flag-FKBP10-8FY-transfected DU4475 cells and control cells treated with 100 μM CHX for the indicated times. **F, G** Western blotting analysis of Flag-FKBP10 and RAD51 proteins (**F**) and quantification of RAD51 proteins (**G**) in Flag-FKBP10-WT- or Flag-FKBP10-8FY-transfected T47D cells and control cells treated with 100 μM CHX for the indicated times. **H** Schema of deletion mutants of FKBP10. The domains shown include signal peptide (red), PPlase (inter part) and EF hand (green). **I** HEK293T cells were transfected with Myc-RAD51 and different Flag-FKBP10 constructs and then subjected to IP and immunoblotting analysis with the indicated antibodies. **J** Representative image of HR in FKBP10-knockdown HEK293T transfected with empty vector, Flag-FKBP10-WT or Flag-FKBP10-8FY using DR-GFP reporter assay (related to **Fig. 5Q**). **K** Body weight gain curves of orthotopic xenograft tumors derived from MDA-MB-231 cells stably transfected with empty vector, Flag-FKBP10-WT or Flag-FKBP10-8FY. Body weights were measured every two days (n = 5 per group; two-way ANOVA). **L, M** Representative images (**L**) and quantification (**M**) of IHC staining of RAD51 and Ki-67 in the indicated tumor tissues. The quantification analyses were based on AOD (one-way ANOVA). Scale bar, 100 μm.

**Fig. S10. FKBP10 stabilizes RAD51 by isomerizing its G-22P-Q motif. A** Representative image of HR in RAD51-deficient HEK293T transfected with empty vector, Myc-RAD51-WT or Myc-RAD51-P22 using DR-GFP reporter assay (related to **Fig. 6G**). **B,** **C** Representative images (**B**) and quantification (**C**) of IHC staining of RAD51 and Ki-67 in tumors from panel **I**. The quantification analyses were based on AOD (one-way ANOVA). Scale bar, 100 μm. **D, E** Backbone-atom root-mean-square deviations (RMSD) of various bound complexes include RAD51 WT/P22A – FKBP10 (**D**) and RAD51 WT/trans – FKBP10 (**E**)over the 100-ns MD simulations.

**Fig. S11. FKBP10 knockdown activates CMA activity. A, B** Western blotting analysis (**A**) and quantification (**B**) of the indicated proteins in FKBP10-knockdown T47D and MDA-MB-231 cells and their control cells. Data represent mean ± SEM of three biologically independent experiments (one-way ANOVA). **C, D** Western blotting analysis (**C**) and quantification (**D**) of the indicated proteins in FKBP10-overexpressing T47D and DU4475 cells and their control cells. Data represent mean ± SEM of three biologically independent experiments (unpaired two-tailed Student’s t test). **E** Western blotting analysis (left panel) and quantification (right panel) of the indicated proteins in T47D cells with knockdown of FKBP10 and LAMP2A alone or in combination. Data represent mean ± SEM of three biologically independent experiments (one-way ANOVA). **F** Western blotting analysis of LC3B and p62 proteins in FKBP10-knockdown MCF-7, T47D and MDA-MB-231 cells and their control cells.

**Fig. S12. FKBP10 negatively regulates ATF6-mediated ERS pathway.**

**A** Western blotting analysis (left panel) and quantification (right panel) of the indicated proteins in FKBP10-knockdown T47D cells and control cells. Data represent mean ± SEM of three biologically independent experiments (one-way ANOVA). **B** Western blotting analysis (left panel) and quantification (right panel) of the indicated proteins in FKBP10-overexpressing T47D cells and control cells. Data represent mean ± SEM of three biologically independent experiments (unpaired two-tailed Student’s t test).

**Fig. S13. Synergistic effect of selumetinib with genotoxic therapies on BC cells. A-C** Western blotting analysis of FKBP10 and RAD51 proteins in MCF-7, T47D and MDA-MB-231 cells treated with BI-2536 (**A**), tivozanib (**B**) and saracatinib (**C**) at the indicated concentrations for 12 h. **D, E** Dose-response curves of MDA-MB-231 cells treated with selumetinib and cisplatin**(D)** or olaparib **(E)** alone or in combination for 48 h. The IC50 values were calculated using GraphPad software. Data represent mean ± SEM. **F** Representative images (left panel) and quantification (right panel) of cellsurvival in MDA-MB-231 cells treated with 20 μM selumetinib in combination with the indicated dose of IR. **G, I** Representative images of H&E-stained liver and kidney tissues from the indicated groups. Scale bar, 100 μm. **H, J** ELISA was used to measure the levels of alanine transaminase (ALT), aspartate aminotransferase (AST), serum creatinine (CRE) and blood urea nitrogen (BUN) in serum of mice with the indicated treatments (one-way ANOVA). **K, L** Representative images (**K**) and quantification (**L**) of IHC staining of FKBP10, RAD51, γH2AX and Ki-67 in tumor tissues from **Fig. 8I**. The quantification analyses were based on AOD (one-way ANOVA). Scale bar, 100 μm. **M, N** Representative images (**M**) and quantification (**N**) of IHC staining of FKBP10, RAD51, γH2AX and Ki-67 in tumor tissues from **Fig. 8M** The quantification analyses were based on AOD (one-way ANOVA). Scale bar, 100 μm.
