# Supplementary material
Source: Research Square preprint supplement (doi:10.21203/rs.3.rs-9586117/v1)
Supplement: Supplementary file 1 [file 1178d4d69686e77f349c55c3.xlsx]

## Sheet: Supplementary Table S1
		Supplementary Table S1. The oligonucleotides used in this study.
		Oligonucleotides	Sequences (5'-3')
		shFKBP10#1	CCACACCTACAATACCTATAT
		shFKBP10#3	CTACCACTACAACGGCACTTT
		siNC	UUCUCCGAACGUGUCACGUTT
		siHSC70	GCUGUUGUCCAGUCUGAUATT
		si-RAD51	CUAAUCAGGUGGUAGCUCAUU
		si-ku80	GCGAGUAACCAGCUCAUAATT
		si-LAMP2A-1	GCUCUACUUAGACUCAAUATT
		si-LAMP2A-2	CGCUAUGAAACUACAAAUATT
		si-ATF6	GCAACCAAUUAUCAGUUUATT
		qPCR-hFKBP10-Forward	AGAACCACATCGAAGTAGAGGG
		qPCR-hFKBP10-Reverse	AGAACCACATCGAAGTAGAGGG
		qPCR-hRAD51-Forward	GAGAAGTGGAGCGTAAGCCA
		qPCR-hRAD51-Reverse	CACACACTCACCTCGGTCC

## Sheet: Supplementary Table S2
				Supplementary Table S2. The antibodies used in this study.
				Antibodies (Western blot analysis)	Detailed information
				FKBP10	Proteintech, 12172-1-AP, 1:2000
				γH2AX	Abcam, ab81299, 1:1000
				Flag-Tag	Proteintech, 66008-4-lg, 1:1000
				β-actin	Affinity, AF7018, 1:5000
				RAD51	Proteintech, 14961-1-AP, 1:1000
				β-tubulin	Proteintech, 10094-1-AP, 1:2000
				MEF2D	Abcam, ab282731, 1:1000
				GAPDH	Proteintech, 60004-1-lg, 1:20000
				LAMP2A	Abcam, ab125068, 1:1000
				HSC70	Novus, 13D3, 1:1000
				Myc-Tag	Cell Signaling Technology, 2278, 1:1000
				GST-Tag	Proteintech, 10000-0-AP, 1:1000
				His-Tag	Proteintech, 66005-1-lg, 1:1000
				HA-Tag	Cell Signaling Technology, 3724, 1:1000
				ATF6	Proteintech, 24169-1-AP, 1:1000
				GRP78	Proteintech, 66574-1-lg, 1:1000
				IRE1α	Proteintech, 27528-1-AP, 1:1000
				p-IRE1α	Abcam, ab243665, 1:1000
				PERK	Proteintech, 24390-1-AP, 1:1000
				p-PERK	Proteintech, 82534-1-RR , 1:1000
				LC3B	Cell Signaling Technology, 2775S, 1:2000
				p62	Proteintech, 18420-1-AP, 1;2000
				Antibodies (Immunofluorescence assays)	Detailed information
				γH2AX	Abcam, ab81299, 1:500
				p-53BP1	Cell Signaling Technology, 2675S, 1:500
				RAD51	Abcam, ab63801, 1:300
				FKBP10	Proteintech, 12172-1-AP, 1:200
				HSC70	Novus, 13D3, 1:200
				Antibodies (Immunohistochemistry assays)	Detailed information
				FKBP10	Proteintech, 12172-1-AP, 1:500
				γH2AX	Abcam, ab81299, 1:500
				RAD51	Proteintech, 14961-1-AP, 1:300
				Ki-67	Abcam, ab15580, 1:20

## Sheet: Supplementary Table S3
Supplementary Table S3. The differential proteins between FKBP10-knockdown MCF-7 cells and control cells.
Protein accession	Protein description	Gene name	SH/NC Ratio	SH/NC P value	Regulated Type	NC_01	NC_02	NC_03	SH_01	SH_02	SH_03
P0C0S8	Histone H2A type 1 OS=Homo sapiens OX=9606 GN=H2AC17 PE=1 SV=2	H2AC17	0.275319	1.73071e-06	Down	1.81049	1.86014	1.82896	0.510436	0.477328	0.526377
Q9NYP7	Elongation of very long chain fatty acids protein 5 OS=Homo sapiens OX=9606 GN=ELOVL5 PE=1 SV=1	ELOVL5	0.293813	8.07639e-05	Down	1.28123	1.09768	1.39801	0.375257	0.353355	0.381094
Q96AY3	Peptidyl-prolyl cis-trans isomerase FKBP10 OS=Homo sapiens OX=9606 GN=FKBP10 PE=1 SV=1	FKBP10	0.320131	4.53109e-05	Down	1.25663	1.29923	1.30278	0.461357	0.39152	0.382393
P84098	60S ribosomal protein L19 OS=Homo sapiens OX=9606 GN=RPL19 PE=1 SV=1	RPL19	0.384522	3.2893e-06	Down	0.927784	0.93651	0.945742	0.343515	0.362029	0.374975
Q08170	Serine/arginine-rich splicing factor 4 OS=Homo sapiens OX=9606 GN=SRSF4 PE=1 SV=2	SRSF4	0.415075	0.0377132	Down		1.60358	1.76613	0.966056	0.642302	0.489667
P11217	Glycogen phosphorylase, muscle form OS=Homo sapiens OX=9606 GN=PYGM PE=1 SV=6	PYGM	0.437399	3.94358e-06	Down	1.10002	1.03056	1.03696	0.454752	0.458878	0.471846
Q9Y2H1	Serine/threonine-protein kinase 38-like OS=Homo sapiens OX=9606 GN=STK38L PE=1 SV=3	STK38L	0.439929	0.0360668	Down	1.85604	1.57147	0.88098	0.502299	0.649881	0.743253
Q06609	DNA repair protein RAD51 homolog 1 OS=Homo sapiens OX=9606 GN=RAD51 PE=1 SV=1	RAD51	0.440348	8.95006e-08	Down	1.13601	1.15301	1.16642	0.507321	0.511416	0.50286
Q01813	ATP-dependent 6-phosphofructokinase, platelet type OS=Homo sapiens OX=9606 GN=PFKP PE=1 SV=2	PFKP	0.44143	1.02317e-06	Down	1.19389	1.25305	1.23805	0.55101	0.537688	0.537969
Q9H9B4	Sideroflexin-1 OS=Homo sapiens OX=9606 GN=SFXN1 PE=1 SV=4	SFXN1	0.444969	4.56912e-07	Down	1.10472	1.1372	1.107	0.501056	0.501957	0.487153
Q00577	Transcriptional activator protein Pur-alpha OS=Homo sapiens OX=9606 GN=PURA PE=1 SV=2	PURA	0.458409	0.00019992	Down	1.0793	1.13036	1.18833	0.568189	0.472615	0.516864
Q08AE8	Protein spire homolog 1 OS=Homo sapiens OX=9606 GN=SPIRE1 PE=1 SV=3	SPIRE1	0.461233	0.000437763	Down	1.27938	1.22612	1.27758	0.667735	0.536609	0.540537
Q9BQ75	Protein CMSS1 OS=Homo sapiens OX=9606 GN=CMSS1 PE=1 SV=2	CMSS1	0.474215	0.000443324	Down	1.06952	0.909068	0.902352	0.430975	0.440483	0.494728
P11021	Endoplasmic reticulum chaperone BiP OS=Homo sapiens OX=9606 GN=HSPA5 PE=1 SV=2	HSPA5	0.496767	3.17715e-06	Down	0.775046	0.780269	0.740273	0.377473	0.375863	0.387037
Q6UX53	Thiol S-methyltransferase METTL7B OS=Homo sapiens OX=9606 GN=METTL7B PE=1 SV=2	METTL7B	0.498984	0.000378088	Down	1.03795	0.955582	0.955539		0.500567	0.480459
O95994	Anterior gradient protein 2 homolog OS=Homo sapiens OX=9606 GN=AGR2 PE=1 SV=1	AGR2	0.501313	0.000224205	Down	0.512946	0.520605	0.538451	0.236005	0.272088	0.279971
Q53GA4	Pleckstrin homology-like domain family A member 2 OS=Homo sapiens OX=9606 GN=PHLDA2 PE=1 SV=2	PHLDA2	0.5083	0.000269258	Down	1.12663	1.14481	1.31586	0.630148	0.616016	0.57726
P0C7H8	Keratin-associated protein 2-3 OS=Homo sapiens OX=9606 GN=KRTAP2-3 PE=1 SV=2	KRTAP2-3	0.512193	0.000157522	Down	1.16676	1.17384	1.18578	0.550324	0.605882	0.649983
Q9Y3D9	28S ribosomal protein S23, mitochondrial OS=Homo sapiens OX=9606 GN=MRPS23 PE=1 SV=2	MRPS23	0.513291	1.45264e-05	Down	1.00261	1.06633	1.01236	0.510072	0.528446	0.543088
Q9NYW5	Taste receptor type 2 member 4 OS=Homo sapiens OX=9606 GN=TAS2R4 PE=1 SV=1	TAS2R4	0.524209	0.00731102	Down	0.756369	0.662429	0.675427		0.40709	0.324784
A8MV81	HIG1 domain family member 1C OS=Homo sapiens OX=9606 GN=HIGD1C PE=1 SV=2	HIGD1C	0.52953	0.000299649	Down	0.866016	0.849653	0.970852	0.445165	0.476004	0.501425
Q9NZ63	Splicing factor C9orf78 OS=Homo sapiens OX=9606 GN=C9orf78 PE=1 SV=1	C9orf78	0.534806	4.62227e-05	Down	1.12676	1.17105	1.24664	0.632047	0.615282	0.648265
Q9NPI6	mRNA-decapping enzyme 1A OS=Homo sapiens OX=9606 GN=DCP1A PE=1 SV=3	DCP1A	0.535117	3.98151e-06	Down	1.16644	1.18271	1.21069	0.63846	0.617989	0.648485
Q6PI78	Transmembrane protein 65 OS=Homo sapiens OX=9606 GN=TMEM65 PE=1 SV=2	TMEM65	0.535532	0.00329298	Down	1.14743	1.03819	1.07563	0.496868	0.558603	0.691034
Q9NPE3	H/ACA ribonucleoprotein complex subunit 3 OS=Homo sapiens OX=9606 GN=NOP10 PE=1 SV=1	NOP10	0.535651	0.000166492	Down	0.950329	1.02414	0.995619	0.525443	0.569677	0.49581
Q9UDW1	Cytochrome b-c1 complex subunit 9 OS=Homo sapiens OX=9606 GN=UQCR10 PE=1 SV=3	UQCR10	0.536743	0.000119623	Down	0.92757	1.05413	0.966117	0.508733	0.539082	0.534405
Q9H3U5	Major facilitator superfamily domain-containing protein 1 OS=Homo sapiens OX=9606 GN=MFSD1 PE=2 SV=2	MFSD1	0.544148	0.03083	Down	1.05373	1.04305	1.02466	0.39452	0.780937	0.523068
P47712	Cytosolic phospholipase A2 OS=Homo sapiens OX=9606 GN=PLA2G4A PE=1 SV=2	PLA2G4A	0.548504	0.000626909	Down	1.13798	1.09432	1.22803	0.665604	0.568838	0.663565
P09913	Interferon-induced protein with tetratricopeptide repeats 2 OS=Homo sapiens OX=9606 GN=IFIT2 PE=1 SV=1	IFIT2	0.560226	1.46229e-05	Down	0.783853	0.787652	0.763214	0.451261	0.436736	0.419973
P61204	ADP-ribosylation factor 3 OS=Homo sapiens OX=9606 GN=ARF3 PE=1 SV=2	ARF3	0.564066	0.0132419	Down	1.02964	1.09443	1.15441	0.467464	0.735873	0.645943
Q86YB8	ERO1-like protein beta OS=Homo sapiens OX=9606 GN=ERO1B PE=1 SV=2	ERO1B	0.564471	0.0258246	Down	0.7906	0.850688	1.01773	0.567234	0.43339
Q3SXM5	Inactive hydroxysteroid dehydrogenase-like protein 1 OS=Homo sapiens OX=9606 GN=HSDL1 PE=1 SV=3	HSDL1	0.569278	0.00201293	Down	1.11713	0.980618	0.917326	0.52938	0.632351	0.554682
P62310	U6 snRNA-associated Sm-like protein LSm3 OS=Homo sapiens OX=9606 GN=LSM3 PE=1 SV=2	LSM3	0.576412	4.84337e-06	Down	0.872626	0.854065	0.862431	0.508723	0.500662	0.483015
Q16719	Kynureninase OS=Homo sapiens OX=9606 GN=KYNU PE=1 SV=1	KYNU	0.577656	0.000152652	Down	0.922405	0.890745	1.00105	0.554092	0.522164	0.549386
Q53LP3	Ankyrin repeat domain-containing protein SOWAHC OS=Homo sapiens OX=9606 GN=SOWAHC PE=1 SV=1	SOWAHC	0.579444	0.000303245	Down	1.10002	1.16829	1.15799	0.615734	0.713664	0.655954
Q99541	Perilipin-2 OS=Homo sapiens OX=9606 GN=PLIN2 PE=1 SV=2	PLIN2	0.579946	0.01027	Down	0.657676	0.715977	0.809957	0.404117	0.354736	0.507523
Q96HQ2	CDKN2AIP N-terminal-like protein OS=Homo sapiens OX=9606 GN=CDKN2AIPNL PE=1 SV=1	CDKN2AIPNL	0.585334	0.00849505	Down	0.945806	1.13312	1.17181	0.68262	0.526048	0.694099
P51571	Translocon-associated protein subunit delta OS=Homo sapiens OX=9606 GN=SSR4 PE=1 SV=1	SSR4	0.587072	1.25651e-06	Down	0.867082	0.862826	0.85468	0.516294	0.502495	0.498549
Q15646	2'-5'-oligoadenylate synthase-like protein OS=Homo sapiens OX=9606 GN=OASL PE=1 SV=2	OASL	0.587213	3.92067e-05	Down	0.554036	0.559507	0.561149	0.34117	0.311424	0.330808
Q8NBI5	Equilibrative nucleobase transporter 1 OS=Homo sapiens OX=9606 GN=SLC43A3 PE=1 SV=2	SLC43A3	0.591666	9.64453e-05	Down	0.864364	0.908039	0.829442	0.53361	0.508569	0.497244
Q8NBS9	Thioredoxin domain-containing protein 5 OS=Homo sapiens OX=9606 GN=TXNDC5 PE=1 SV=2	TXNDC5	0.440348	8.95006e-08	Down	1.13601	1.15301	1.16642	0.507321	0.511416	0.50286
Q15287	RNA-binding protein with serine-rich domain 1 OS=Homo sapiens OX=9606 GN=RNPS1 PE=1 SV=1	RNPS1	0.601481	0.000129295	Down	0.951233	0.943604	0.875636	0.533392	0.577344	0.555651
O14735	CDP-diacylglycerol--inositol 3-phosphatidyltransferase OS=Homo sapiens OX=9606 GN=CDIPT PE=1 SV=1	CDIPT	0.601999	0.00265024	Down	0.828992	0.876665	0.884973	0.553391		0.486313
P35244	Replication protein A 14 kDa subunit OS=Homo sapiens OX=9606 GN=RPA3 PE=1 SV=1	RPA3	0.602435	0.00171726	Down	1.03241	0.982264	1.2174	0.626901	0.653764	0.66645
P21359	Neurofibromin OS=Homo sapiens OX=9606 GN=NF1 PE=1 SV=2	NF1	0.607353	0.00329875	Down	0.977614	0.891566	0.854748	0.529366	0.627643	0.497377
P61923	Coatomer subunit zeta-1 OS=Homo sapiens OX=9606 GN=COPZ1 PE=1 SV=1	COPZ1	0.611613	1.36209e-05	Down	1.0245	0.973155	0.990253	0.608469	0.5971	0.621875
Q9UM00	Calcium load-activated calcium channel OS=Homo sapiens OX=9606 GN=TMCO1 PE=1 SV=2	TMCO1	0.614585	0.00038905	Down	0.875583	0.900645	0.832888	0.562929	0.495856	0.544738
Q15011	Homocysteine-responsive endoplasmic reticulum-resident ubiquitin-like domain member 1 protein OS=Homo sapiens OX=9606 GN=HERPUD1 PE=1 SV=1	HERPUD1	0.615527	0.00134145	Down	1.23073	1.18487	1.18937	0.732825	0.820056	0.66607
Q9NXF7	DDB1- and CUL4-associated factor 16 OS=Homo sapiens OX=9606 GN=DCAF16 PE=1 SV=1	DCAF16	0.616147	0.00266921	Down	1.3848	1.24404	1.3148		0.846657	0.773249
P13667	Protein disulfide-isomerase A4 OS=Homo sapiens OX=9606 GN=PDIA4 PE=1 SV=2	PDIA4	0.617016	8.22787e-07	Down	0.85248	0.860927	0.866615	0.529533	0.53847	0.523912
Q8NCG7	Diacylglycerol lipase-beta OS=Homo sapiens OX=9606 GN=DAGLB PE=1 SV=2	DAGLB	0.617786	3.68887e-05	Down	1.12436	1.04909	1.12409	0.684111	0.669782	0.683282
P06703	Protein S100-A6 OS=Homo sapiens OX=9606 GN=S100A6 PE=1 SV=1	S100A6	0.618145	0.00562971	Down	1.32035	1.12034	1.0292	0.652516	0.718361	0.774015
Q8WV24	Pleckstrin homology-like domain family A member 1 OS=Homo sapiens OX=9606 GN=PHLDA1 PE=1 SV=4	PHLDA1	0.618598	0.00946607	Down	1.18723	0.89118	0.886289	0.642523	0.581027	0.610406
Q13951	Core-binding factor subunit beta OS=Homo sapiens OX=9606 GN=CBFB PE=1 SV=2	CBFB	0.620683	1.79395e-05	Down	1.17758	1.23434	1.2118	0.732734	0.746552	0.7699
P04808	Prorelaxin H1 OS=Homo sapiens OX=9606 GN=RLN1 PE=1 SV=1	RLN1	0.626688	0.00355084	Down	0.965561	0.923864	0.977965	0.689124	0.537471	0.570364
Q9HB07	MYG1 exonuclease OS=Homo sapiens OX=9606 GN=MYG1 PE=1 SV=3	MYG1	0.626916	0.000427766	Down	1.15368	1.13631	1.09482	0.688168	0.668928	0.764896
Q9H936	Mitochondrial glutamate carrier 1 OS=Homo sapiens OX=9606 GN=SLC25A22 PE=1 SV=1	SLC25A22	0.627834	0.0041517	Down	0.853682	0.868894	0.736514	0.457639	0.558704	0.527558
P43307	Translocon-associated protein subunit alpha OS=Homo sapiens OX=9606 GN=SSR1 PE=1 SV=3	SSR1	0.62866	4.43387e-05	Down	0.751991	0.713292	0.733557	0.443668	0.471529	0.467127
Q9Y4L1	Hypoxia up-regulated protein 1 OS=Homo sapiens OX=9606 GN=HYOU1 PE=1 SV=1	HYOU1	0.62936	2.95021e-05	Down	0.800232	0.825105	0.808057	0.525953	0.491423	0.514104
Q6ZMI0	Protein phosphatase 1 regulatory subunit 21 OS=Homo sapiens OX=9606 GN=PPP1R21 PE=1 SV=1	PPP1R21	0.634418	0.0142366	Down	0.734793	0.635311	0.797068	0.469813		0.446783
P57105	Synaptojanin-2-binding protein OS=Homo sapiens OX=9606 GN=SYNJ2BP PE=1 SV=2	SYNJ2BP	0.635546	0.000360114	Down	1.03912	0.97595	0.963368	0.673297	0.611307	0.608331
O75467	Zinc finger protein 324A OS=Homo sapiens OX=9606 GN=ZNF324 PE=2 SV=1	ZNF324	0.640221	3.56754e-05	Down	0.980463	0.951212	1.02262	0.633907	0.621863	0.635633
Q9P287	BRCA2 and CDKN1A-interacting protein OS=Homo sapiens OX=9606 GN=BCCIP PE=1 SV=1	BCCIP	0.642041	0.000378701	Down	1.26088	1.25029	1.12395	0.769063	0.763563	0.801274
Q86TM6	E3 ubiquitin-protein ligase synoviolin OS=Homo sapiens OX=9606 GN=SYVN1 PE=1 SV=2	SYVN1	0.644921	0.00231075	Down	0.833163	0.923049	0.862773	0.580297		0.545729
P13796	Plastin-2 OS=Homo sapiens OX=9606 GN=LCP1 PE=1 SV=6	LCP1	0.650005	0.000125001	Down	0.952211	0.987713	0.965015	0.599255	0.630195	0.658774
Q8N6T7	NAD-dependent protein deacylase sirtuin-6 OS=Homo sapiens OX=9606 GN=SIRT6 PE=1 SV=2	SIRT6	0.651919	0.00470143	Down	1.01767	1.10585	0.993185	0.613454	0.648323	0.770061
Q04760	Lactoylglutathione lyase OS=Homo sapiens OX=9606 GN=GLO1 PE=1 SV=4	GLO1	0.652164	0.000158597	Down	1.16517	1.14581	1.13506	0.792582	0.738691	0.716109
Q9Y3B8	Oligoribonuclease, mitochondrial OS=Homo sapiens OX=9606 GN=REXO2 PE=1 SV=3	REXO2	0.653333	4.4522e-05	Down	1.03589	1.04478	1.06797	0.659404	0.691	0.706704
P05161	Ubiquitin-like protein ISG15 OS=Homo sapiens OX=9606 GN=ISG15 PE=1 SV=5	ISG15	0.654137	1.61291e-05	Down	0.515602	0.487679	0.506654	0.331839	0.326063	0.329803
O14879	Interferon-induced protein with tetratricopeptide repeats 3 OS=Homo sapiens OX=9606 GN=IFIT3 PE=1 SV=1	IFIT3	0.656154	0.000605217	Down	0.763322	0.762454	0.810303	0.536894	0.473591	0.522344
Q8IV50	LysM and putative peptidoglycan-binding domain-containing protein 2 OS=Homo sapiens OX=9606 GN=LYSMD2 PE=1 SV=1	LYSMD2	0.656541	0.00236904	Down	1.10159	1.12022		0.769963	0.685732	0.732364
O75608	Acyl-protein thioesterase 1 OS=Homo sapiens OX=9606 GN=LYPLA1 PE=1 SV=1	LYPLA1	0.659181	0.00510561	Down	1.09675	1.0662	1.0122	0.601941	0.758416	0.732639
P32321	Deoxycytidylate deaminase OS=Homo sapiens OX=9606 GN=DCTD PE=1 SV=2	DCTD	0.661228	0.000217705	Down	1.05937	1.09624	1.10252	0.761828	0.6954	0.697136
Q86V88	Magnesium-dependent phosphatase 1 OS=Homo sapiens OX=9606 GN=MDP1 PE=1 SV=1	MDP1	0.661294	0.00050894	Down	1.15829	1.18581	1.18531	0.744013	0.749088	0.840873
Q8NI22	Multiple coagulation factor deficiency protein 2 OS=Homo sapiens OX=9606 GN=MCFD2 PE=1 SV=1	MCFD2	0.662055	0.00563333	Down	0.945051	0.990611	0.885514	0.655663	0.589519
O43427	Acidic fibroblast growth factor intracellular-binding protein OS=Homo sapiens OX=9606 GN=FIBP PE=1 SV=3	FIBP	0.662757	0.00314223	Down	1.01791	1.16484	1.16482	0.802962	0.732059	0.6836
P26885	Peptidyl-prolyl cis-trans isomerase FKBP2 OS=Homo sapiens OX=9606 GN=FKBP2 PE=1 SV=2	FKBP2	0.665937	3.84355e-05	Down	0.944062	0.918163	0.967594	0.643639	0.627378	0.613465
P49914	5-formyltetrahydrofolate cyclo-ligase OS=Homo sapiens OX=9606 GN=MTHFS PE=1 SV=2	MTHFS	0.66601	0.000164302	Down	1.15938	1.06514	1.09646	0.725827	0.761194	0.724783
P22692	Insulin-like growth factor-binding protein 4 OS=Homo sapiens OX=9606 GN=IGFBP4 PE=1 SV=2	IGFBP4	1.51269	0.00379737	Up	0.92248	0.839792	0.943604	1.51212	1.34339	1.23766
Q6UXG2	Endosome/lysosome-associated apoptosis and autophagy regulator 1 OS=Homo sapiens OX=9606 GN=ELAPOR1 PE=1 SV=2	ELAPOR1	1.51819	0.00424573	Up	0.935643	1.07925	0.935778	1.63134	1.35771	1.49063
Q9H3M7	Thioredoxin-interacting protein OS=Homo sapiens OX=9606 GN=TXNIP PE=1 SV=1	TXNIP	1.52755	0.0239648	Up	0.761906	0.975326	0.636612	1.19058	1.22454	1.21104
P13645	Keratin, type I cytoskeletal 10 OS=Homo sapiens OX=9606 GN=KRT10 PE=1 SV=6	KRT10	1.53229	7.36431e-05	Up	0.851132	0.818023	0.821826	1.28161	1.21994	1.31536
O43759	Synaptogyrin-1 OS=Homo sapiens OX=9606 GN=SYNGR1 PE=1 SV=2	SYNGR1	1.53675	0.00103617	Up	0.877104	0.825652	0.889617	1.21557	1.41127	1.35699
O76070	Gamma-synuclein OS=Homo sapiens OX=9606 GN=SNCG PE=1 SV=2	SNCG	1.54354	0.0258102	Up	0.870551	0.864219	0.930051	1.40054	1.62978	1.08293
Q8NBX0	Saccharopine dehydrogenase-like oxidoreductase OS=Homo sapiens OX=9606 GN=SCCPDH PE=1 SV=1	SCCPDH	1.54791	0.0215967	Up	0.704714	0.93197	0.645714	1.28069	1.07126	1.18101
Q11203	CMP-N-acetylneuraminate-beta-1,4-galactoside alpha-2,3-sialyltransferase OS=Homo sapiens OX=9606 GN=ST3GAL3 PE=1 SV=1	ST3GAL3	1.55308	0.000740357	Up	0.835005	0.793272	0.72183	1.19802	1.26698	1.1849
Q92626	Peroxidasin homolog OS=Homo sapiens OX=9606 GN=PXDN PE=1 SV=2	PXDN	1.55512	0.000454505	Up	0.893494	0.781955	0.859978	1.28127	1.34284	1.31878
P37268	Squalene synthase OS=Homo sapiens OX=9606 GN=FDFT1 PE=1 SV=1	FDFT1	1.56507	1.14313e-06	Up	0.833878	0.817558	0.824004	1.3099	1.28646	1.27786
Q99650	Oncostatin-M-specific receptor subunit beta OS=Homo sapiens OX=9606 GN=OSMR PE=1 SV=1	OSMR	1.59945	0.000389734	Up	1.10498	1.00941	0.990458	1.7407	1.59476	1.63059
P16144	Integrin beta-4 OS=Homo sapiens OX=9606 GN=ITGB4 PE=1 SV=5	ITGB4	1.6134	1.31163e-06	Up	0.884433	0.859335	0.869449	1.39937	1.39444	1.42236
P08572	Collagen alpha-2(IV) chain OS=Homo sapiens OX=9606 GN=COL4A2 PE=1 SV=4	COL4A2	1.62237	0.0013356	Up	0.877964	0.726273	0.832054	1.29707	1.37769	1.2778
Q9Y6V0	Protein piccolo OS=Homo sapiens OX=9606 GN=PCLO PE=1 SV=5	PCLO	1.62832	0.00014342	Up	0.984447	0.873855	0.931414	1.51069	1.51414	1.51772
Q9HBL0	Tensin-1 OS=Homo sapiens OX=9606 GN=TNS1 PE=1 SV=3	TNS1	1.64939	0.00545928	Up	0.856316	0.74644	0.875955	1.32438	1.20308	1.5609
O15230	Laminin subunit alpha-5 OS=Homo sapiens OX=9606 GN=LAMA5 PE=1 SV=8	LAMA5	1.65515	5.52258e-05	Up	0.704011	0.732927	0.712844	1.21832	1.12714	1.21276
Q01581	Hydroxymethylglutaryl-CoA synthase, cytoplasmic OS=Homo sapiens OX=9606 GN=HMGCS1 PE=1 SV=2	HMGCS1	1.6571	4.88949e-06	Up	0.868406	0.859921	0.877721	1.46047	1.39951	1.45851
Q7Z695	Uncharacterized aarF domain-containing protein kinase 2 OS=Homo sapiens OX=9606 GN=ADCK2 PE=1 SV=1	ADCK2	1.65964	0.000131661	Up	0.911508	0.93861	1.02409	1.58892	1.58522	1.596
Q6JBY9	CapZ-interacting protein OS=Homo sapiens OX=9606 GN=RCSD1 PE=1 SV=1	RCSD1	1.6678	3.26236e-06	Up	0.893465	0.90981	0.928838	1.53435	1.49425	1.528
Q3B7T1	Erythroid differentiation-related factor 1 OS=Homo sapiens OX=9606 GN=EDRF1 PE=1 SV=1	EDRF1	1.66964	0.0417453	Up	0.676228	0.792788		1.13851	1.31422
Q5FWF4	DNA annealing helicase and endonuclease ZRANB3 OS=Homo sapiens OX=9606 GN=ZRANB3 PE=1 SV=2	ZRANB3	1.67763	0.000130972	Up	0.953884	0.901705	0.8792	1.57821	1.4508	1.55897
Q9UKG9	Peroxisomal carnitine O-octanoyltransferase OS=Homo sapiens OX=9606 GN=CROT PE=1 SV=2	CROT	1.69787	0.0051152	Up	0.884656	0.824835	0.678268	1.44008	1.40161	1.21242
P25815	Protein S100-P OS=Homo sapiens OX=9606 GN=S100P PE=1 SV=2	S100P	1.72391	0.0204364	Up	0.764363	0.484032	0.528633	0.909226	1.07973	1.07447
O15522	Homeobox protein Nkx-2.8 OS=Homo sapiens OX=9606 GN=NKX2-8 PE=2 SV=2	NKX2-8	1.72422	0.00100892	Up	0.882504	1.0349	0.97126	1.59145	1.58212	1.80712
O75635	Serpin B7 OS=Homo sapiens OX=9606 GN=SERPINB7 PE=1 SV=1	SERPINB7	1.74205	6.21304e-06	Up	0.913341	0.934039	0.955426	1.64159	1.58897	1.65207
Q9NS62	Thrombospondin type-1 domain-containing protein 1 OS=Homo sapiens OX=9606 GN=THSD1 PE=1 SV=1	THSD1	1.8055	3.64295e-05	Up	0.947707	0.89325	0.928083	1.64095	1.61356	1.74499
Q15276	Rab GTPase-binding effector protein 1 OS=Homo sapiens OX=9606 GN=RABEP1 PE=1 SV=2	RABEP1	1.82107	0.000748822	Up	0.819199	0.820628	0.805298	1.61306	1.53428	1.30539
P35908	Keratin, type II cytoskeletal 2 epidermal OS=Homo sapiens OX=9606 GN=KRT2 PE=1 SV=2	KRT2	1.84777	1.86883e-05	Up	0.728638	0.766104	0.783603	1.36868	1.4024	1.43878
P04264	Keratin, type II cytoskeletal 1 OS=Homo sapiens OX=9606 GN=KRT1 PE=1 SV=6	KRT1	1.84954	1.38818e-05	Up	0.745799	0.72474	0.723353	1.29501	1.37135	1.39132
Q8IZT6	Abnormal spindle-like microcephaly-associated protein OS=Homo sapiens OX=9606 GN=ASPM PE=1 SV=2	ASPM	2.17795	0.000103457	Up	0.713444	0.736242		1.57312	1.63546	1.52744
Q96HY7	2-oxoadipate dehydrogenase complex component E1 OS=Homo sapiens OX=9606 GN=DHTKD1 PE=1 SV=2	DHTKD1	2.19958	0.0166334	Up	0.607951	0.416222	0.858597	1.34363	1.37889	1.41878
O95628	CCR4-NOT transcription complex subunit 4 OS=Homo sapiens OX=9606 GN=CNOT4 PE=1 SV=3	CNOT4	2.21017	0.0415518	Up	0.726955	0.718754			1.51092	1.68434
Q9UGT4	Sushi domain-containing protein 2 OS=Homo sapiens OX=9606 GN=SUSD2 PE=1 SV=1	SUSD2	2.35874	9.16025e-07	Up	0.755021	0.731868	0.734799	1.73244	1.71367	1.79428
Q16270	Insulin-like growth factor-binding protein 7 OS=Homo sapiens OX=9606 GN=IGFBP7 PE=1 SV=1	IGFBP7	2.4236	0.00155954	Up	0.760903	0.548913	0.761691	1.55691	1.66384	1.79975
Q13642	Four and a half LIM domains protein 1 OS=Homo sapiens OX=9606 GN=FHL1 PE=1 SV=4	FHL1	2.44307	0.0154706	Up	0.640968	0.715704	0.385961	1.56648	1.09855	1.59234
P35527	Keratin, type I cytoskeletal 9 OS=Homo sapiens OX=9606 GN=KRT9 PE=1 SV=3	KRT9	3.1253	2.09846e-05	Up	0.504625	0.537934	0.592576	1.65852	1.75518	1.69659

## Sheet: Supplementary Table S4
Supplementary Table S4. A list of compounds that are potentially related to FKBP10 knockdown using the Connectivity Map (CMap) database.
Rank	Score	ID	Name	Description
1	97.89	BRD-K57080016	selumetinib	MEK inhibitor
2	96.98	BRD-K53414658	tivozanib	VEGFR inhibitor
3	96.43	BRD-K64890080	BI-2536	PLK inhibitor
4	96.14	BRD-K19540840	saracatinib	SRC inhibitor
5	96.12	BRD-K49865102	PD-0325901	MEK inhibitor
6	96.1	BRD-U88459701	atorvastatin	HMGCR inhibitor
7	95.66	BRD-K67868012	PI-103	MTOR inhibitor
8	95.6	BRD-K17896185	FIT	Opioid receptor agonist
9	95.45	BRD-A68888262	azelastine	Histamine receptor antagonist
10	95.37	BRD-K41895714	AS-605240	PI3K inhibitor
11	95.19	BRD-K77947974	fluspirilene	Dopamine receptor antagonist
12	94.78	BRD-K61250553	loperamide	Opioid receptor agonist
13	94.75	BRD-K46056750	AZD-7762	CHK inhibitor
14	94.55	BRD-K99964838	bosutinib	ABL inhibitor
15	93.99	BRD-K13810148	givinostat	HDAC inhibitor
16	93.9	BRD-K50891186	GR-103691	Dopamine receptor antagonist
17	93.55	BRD-K36740062	GSK-1070916	Aurora kinase inhibitor
18	93.47	BRD-K68065987	MK-2206	AKT inhibitor
19	93	BRD-A49225603	alimemazine	Histamine receptor agonist
20	92.95	BRD-K94294671	OSI-027	MTOR inhibitor
21	92.88	BRD-K09499853	KU-0060648	DNA dependent protein kinase inhibitor
22	92.86	BRD-K37991163	paroxetine	Selective serotonin reuptake inhibitor (SSRI)
23	92.68	BRD-K34581968	BMS-536924	IGF-1 inhibitor
24	92.58	BRD-K03319035	maprotiline	Norepinephrine reuptake inhibitor
25	92.55	BRD-K73293050	WZ-3146	EGFR inhibitor
26	92.5	BRD-K78431006	crizotinib	ALK inhibitor
27	92.46	BRD-K66296774	fluvastatin	HMGCR inhibitor
28	92.16	BRD-K49294207	BIBU-1361	EGFR inhibitor
29	92.01	BRD-K52911425	GDC-0941	PI3K inhibitor
30	91.48	BRD-K10995081	perphenazine	Dopamine receptor antagonist
31	91.35	BRD-K68488863	ENMD-2076	FLT3 inhibitor
32	90.86	BRD-K50140147	NVP-TAE684	ALK inhibitor
33	90.64	BRD-K94832621	Y-134	Estrogen receptor antagonist
34	90.47	BRD-K55127134	fluphenazine	Dopamine receptor antagonist
35	90.19	BRD-A26002865	verrucarin-a	Protein synthesis inhibitor
36	89.91	BRD-K63165456	norcyclobenzaprine	Adrenergic receptor agonist
37	89.8	BRD-K69932463	AZD-8055	MTOR inhibitor
38	89.75	BRD-K56047318	RHC-80267	Triacylglycerol lipase inhibitor
39	89.54	BRD-K17743697	KB-R7943	Sodium/calcium exchange inhibitor
40	89.38	BRD-K63675182	triflupromazine	Dopamine receptor antagonist
41	89.32	BRD-K71035033	masitinib	KIT inhibitor
42	89.25	BRD-K85015012	NNC-05-2090	GAT inhibitor
43	89.14	BRD-K59369769	tozasertib	Aurora kinase inhibitor
44	89.07	BRD-K12184916	dactolisib	MTOR inhibitor
45	88.39	BRD-K52397688	amperozide	Dopamine receptor antagonist
46	88.39	BRD-K85606544	neratinib	EGFR inhibitor
47	88.32	BRD-K89732114	trifluoperazine	Dopamine receptor antagonist
48	88.26	BRD-K11911061	GR-127935	Serotonin receptor antagonist
49	88.24	BRD-A25687296	emetine	Protein synthesis inhibitor
50	88.04	BRD-K70914287	BIBX-1382	EGFR inhibitor
51	87.74	BRD-U68942961	JW-7-24-1	LCK Inhibitor
52	87.69	BRD-M64432851	sunitinib	FLT3 inhibitor
53	87.52	BRD-K81169441	cerivastatin	HMGCR inhibitor
54	87.16	BRD-A19195498	trimipramine	Norepinephrine reuptake inhibitor
55	86.58	BRD-K27737647	H-89	PKA inhibitor
56	86.35	BRD-K77008974	WYE-354	MTOR inhibitor
57	86.26	BRD-A30435184	metergoline	Dopamine receptor agonist
58	85.9	BRD-K91263825	nortriptyline	Tricyclic antidepressant
59	85.86	BRD-K64341947	CFM-1571	Guanylate cyclase activator
60	85.83	BRD-K86204871	terconazole	Sterol demethylase inhibitor
61	85.83	BRD-K29950728	clomifene	Estrogen receptor antagonist
62	85.78	BRD-K62965247	tipifarnib-P2	farnesyltransferase inhibitor
63	85.32	BRD-K73978287	hydrocortisone	Glucocorticoid receptor agonist
64	85.27	BRD-K99818283	PIK-90	PI3K inhibitor
65	85.13	BRD-A15530910	carpindolol	Adrenergic receptor antagonist
66	85.1	BRD-K86930074	cediranib	KIT inhibitor
67	84.81	BRD-K70487031	flupentixol	Dopamine receptor antagonist
68	84.73	BRD-A39646320	HC-toxin	HDAC inhibitor
69	84.71	BRD-K69840642	ISOX	HDAC inhibitor
70	84.49	BRD-A81795050	U-18666A	Oxidosqualene cyclase inhibitor
71	84.4	BRD-K18779551	bifemelane	Acetylcholine release stimulant
72	84.38	BRD-K49328571	dasatinib	BCR-ABL kinase inhibitor
73	84.3	BRD-A84481105	thioridazine	Dopamine receptor antagonist
74	84.03	BRD-K17953061	staurosporine	PKC inhibitor
75	83.92	BRD-A19633847	perhexiline	Carnitine palmitoyltransferase inhibitor
76	83.91	BRD-K82036761	sertraline	Serotonin receptor antagonist
77	83.88	BRD-K72420232	WZ-4002	EGFR inhibitor
78	83.77	BRD-K68174511	torin-2	MTOR inhibitor
79	83.75	BRD-K97309399	thiothixene	Dopamine receptor antagonist
80	83.75	BRD-K94441233	mevastatin	HMGCR inhibitor
81	83.46	BRD-K06792661	narciclasine	Coflilin signaling pathway activator
82	82.92	BRD-K20742498	RS-39604	Serotonin receptor antagonist
83	82.48	BRD-K52522949	NCH-51	HDAC inhibitor
84	82.1	BRD-A11678676	wortmannin	PI3K inhibitor
85	81.72	BRD-K60219430	serdemetan	MDM inhibitor
86	81.44	BRD-K12244279	MEK1-2-inhibitor	MEK inhibitor
87	81.1	BRD-K58299615	RO-90-7501	Beta amyloid inhibitor
88	81.04	BRD-K19352500	prochlorperazine	Dopamine receptor antagonist
89	80.87	BRD-A18579359	wiskostatin	Neural Wiskott-Aldrich syndrome protein inhibitor
90	80.52	BRD-K59058766	chlorprothixene	Dopamine receptor antagonist
91	80.41	BRD-K89997465	chlorpromazine	Dopamine receptor antagonist
92	78.96	BRD-K01436366	XMD-1150	Leucine rich repeat kinase inhibitor
93	78.74	BRD-K17674993	diflorasone	Corticosteroid agonist
94	78.61	BRD-A29901043	KIN001-127	ITK inhibitor
95	78.47	BRD-K01649396	indatraline	Norepinephrine transporter inhibitor
96	78.43	BRD-K50464341	berbamine	Calmodulin antagonist
97	78.37	BRD-K40175214	torin-1	MTOR inhibitor
98	78.34	BRD-K02407574	parbendazole	Tubulin inhibitor
99	78.25	BRD-A13133631	fluorometholone	Glucocorticoid receptor agonist
100	78.17	BRD-K12502280	TG-101348	FLT3 inhibitor
101	77.6	BRD-K68202742	trichostatin-a	HDAC inhibitor
102	76.96	BRD-K20285085	fostamatinib	SYK inhibitor
103	76.36	BRD-K62289640	lylamine	Cannabinoid receptor agonist
104	76.31	BRD-K76840893	RS-17053	Adrenergic receptor antagonist
105	76.12	BRD-K15791587	L-733060	Tachykinin antagonist
106	75.89	BRD-K82357231	desloratadine	Histamine receptor antagonist
107	75.59	BRD-A84134924	pancuronium	Acetylcholine receptor antagonist
108	74.65	BRD-U25771771	WZ-4-145	EGFR inhibitor
109	73.99	BRD-A07765530	epinephrine	carbonic anhydrase activator
110	73.69	BRD-K07403598	CAY-10470	NFkB pathway inhibitor
111	73.49	BRD-K56403959	ZK-756326	CC chemokine receptor ligand
112	73.43	BRD-K62221994	T-98475	Gonadotropin releasing factor hormone receptor antagonist
113	73.35	BRD-K95785537	PP-2	SRC inhibitor
114	73.32	BRD-K08219523	5-nonyloxytryptamine	Serotonin receptor agonist
115	73.18	BRD-K64881305	ispinesib	Kinesin-like spindle protein inhibitor
116	73.07	BRD-A23290232	westcort	Glucocorticoid receptor agonist
117	72.89	BRD-K70490179	rimcazole	Sigma receptor antagonist
118	72.8	BRD-K39746403	erythromycin	NFkB pathway inhibitor
119	72.69	BRD-K72703948	ZM-447439	Aurora kinase inhibitor
120	72.41	BRD-K17561142	amiodarone	Potassium channel blocker
121	72.16	BRD-K09549677	mibefradil	T-type calcium channel blocker
122	71.82	BRD-K63828191	raloxifene	Estrogen receptor antagonist
123	71.7	BRD-K95763993	trapidil	PDGFR receptor inhibitor
124	71.38	BRD-K93201660	ML-7	Myosin light chain kinase inhibitor
125	71.07	BRD-A44551378	LFM-A12	EGFR inhibitor
126	70.85	BRD-A98283014	calmidazolium	Calcium channel blocker
127	70.82	BRD-A06352418	terfenadine	Histamine receptor antagonist
128	70.72	BRD-K82147103	lofepramine	Norepinephrine reuptake inhibitor
129	70.59	BRD-K37194137	III606050	Cytochrome P450 inhibitor
130	70.33	BRD-K05653692	DL-PDMP	Glucosyltransferase inhibitor
131	70.3	BRD-K68402494	ML-9	Myosin light chain kinase inhibitor
132	70.26	BRD-K80348542	cephaeline	Protein synthesis inhibitor
133	70.21	BRD-K55344148	BU-224	Imidazoline receptor ligand
134	70.2	BRD-K04887706	AKT-inhibitor-1-2	AKT inhibitor
135	69.96	BRD-K06980535	promazine	Dopamine receptor antagonist
136	69.67	BRD-K02130563	panobinostat	HDAC inhibitor
137	69.63	BRD-K76674262	homoharringtonine	Protein synthesis inhibitor
138	69.6	BRD-K00337317	NU-7441	DNA dependent protein kinase inhibitor
139	69.39	BRD-K63068307	ZSTK-474	PI3K inhibitor
140	69.3	BRD-K51918615	iodophenpropit	Histamine receptor antagonist
141	69.23	BRD-K27450477	EHNA	Adenosine deaminase inhibitor
142	69.08	BRD-A35912562	pregnenolone	Glutamate receptor modulator
143	68.9	BRD-K50311478	tosyl-phenylalanyl-chloromethyl-ketone	Chymotrypsin inhibitor
144	68.85	BRD-K05181084	NGB-2904	Dopamine receptor antagonist
145	68.84	BRD-K83972459	JWE-035	Aurora kinase inhibitor
146	68.62	BRD-K67566344	KU-0063794	MTOR inhibitor
147	68.59	BRD-K09485525	GANT-61	GLI antagonist
148	68.48	BRD-K19554809	MK-212	Serotonin receptor agonist
149	68.16	BRD-K17140735	SCH-79797	Proteasome inhibitor
150	68.14	BRD-K13514097	everolimus	MTOR inhibitor
151	67.91	BRD-A89337244	PD-102807	Acetylcholine receptor antagonist
152	67.84	BRD-K35960502	niclosamide	DNA replication inhibitor
153	67.45	BRD-K95921201	reserpine	Vesicular monoamine transporter inhibitor
154	66.97	BRD-K05104363	PD-184352	MEK inhibitor
155	66.83	BRD-U37049823	HG-6-64-01	RAF inhibitor
156	66.46	BRD-K66175015	afatinib	EGFR inhibitor
157	66.42	BRD-K30240666	clemastine	Histamine receptor antagonist
158	66.36	BRD-K28470988	L-690330	Inositol monophosphatase inhibitor
159	66.27	BRD-K30097969	pitavastatin	HMGCR inhibitor
160	66.27	BRD-K64606589	apicidin	HDAC inhibitor
161	66.22	BRD-K76304753	phenazopyridine	Local anesthetic
162	66.04	BRD-K89014967	AS-703026	MEK inhibitor
163	65.98	BRD-A16934955	nalbuphine	Opioid receptor agonist
164	65.97	BRD-K06335600	tizanidine	Adrenergic receptor agonist
165	65.95	BRD-K28912512	nicotinamide	Protein synthesis stimulant
166	65.91	BRD-A63546914	RO-04-5595	Glutamate receptor antagonist
167	65.76	BRD-A75479906	rimantadine	Antiviral
168	65.53	BRD-K40887525	ritanserin	Serotonin receptor antagonist
169	65.26	BRD-K13049116	BMS-754807	IGF-1 inhibitor
170	65.15	BRD-A16478930	amcinonide	Glucocorticoid receptor agonist
171	64.32	BRD-A28422058	L-689560	Glutamate receptor antagonist
172	64.26	BRD-K97365803	PI-828	PI3K inhibitor
173	64.06	BRD-K14282469	LY-165163	Serotonin receptor antagonist
174	63.53	BRD-K89162000	tandutinib	FLT3 inhibitor
175	63.31	BRD-K56957086	dacinostat	HDAC inhibitor
176	63.28	BRD-A85587465	bemesetron	Serotonin receptor antagonist
177	63.27	BRD-A52660433	tetrindole	Monoamine oxidase inhibitor
178	63.16	BRD-A94413429	NTNCB	Neuropeptide receptor antagonist
179	63	BRD-A02367930	ethinyl-estradiol	DNA directed DNA polymerase stimulant
180	62.83	BRD-K02965346	SU-11274	Hepatocyte growth factor receptor inhibitor
181	62.78	BRD-K85503079	perospirone	Dopamine receptor antagonist
182	62.73	BRD-K52735702	cefdinir	Bacterial cell wall synthesis inhibitor
183	62.57	BRD-K30867024	SB-216641	Serotonin receptor antagonist
184	62.04	BRD-K60623809	SU-11652	Tyrosine kinase inhibitor
185	61.97	BRD-K47323024	methapyrilene	Histamine receptor antagonist
186	61.7	BRD-A41112154	oleanolic-acid	G protein-coupled receptor agonist
187	61.57	BRD-K12219985	glipizide	Sulfonylurea
188	61.08	BRD-K68756823	FR-180204	-666
189	60.56	BRD-K03981224	ethisterone	Progestogen hormone
190	60.22	BRD-A08877921	cephalotaxine	Protein synthesis inhibitor
191	60.11	BRD-K05804044	AZ-628	RAF inhibitor
192	60.07	BRD-A71765365	mepireserpate	Catecholamine depleting sympatholytic
193	59.88	BRD-A09062839	amylocaine	Local anesthetic
194	59.7	BRD-K74733595	APHA-compound-8	HDAC inhibitor
195	59.56	BRD-A41450521	tosufloxacin	Bacterial DNA gyrase inhibitor
196	59.29	BRD-A16311756	profenamine	Butyrylcholinesterase inhibitor
197	58.97	BRD-A81772229	simvastatin	HMGCR inhibitor
198	58.92	BRD-A18763547	BAX-channel-blocker	Cytochrome C release inhibitor
199	58.86	BRD-K05434375	HA-1004	Calcium channel blocker
200	58.85	BRD-K62810658	PD-98059	MEK inhibitor
201	58.6	BRD-K15916496	clotrimazole	Cytochrome P450 inhibitor
202	58.57	BRD-K95435023	PHA-665752	c-Met inhibitor
203	58.42	BRD-K11630072	carmofur	Thymidylate synthase inhibitor
204	57.68	BRD-K32330832	VER-155008	HSP inhibitor
205	57.51	BRD-K82216340	medroxyprogesterone	progesterone receptor agonist
206	57.44	BRD-K60762818	desipramine	Tricyclic antidepressant
207	57.43	BRD-K41337261	ZM-306416	ABL inhibitor
208	57.4	BRD-K11663430	pyroxamide	HDAC inhibitor
209	57.08	BRD-K75615183	talipexole	Adrenergic receptor agonist
210	57.08	BRD-K17743125	belinostat	HDAC inhibitor
211	57.05	BRD-K67506692	tyrphostin-AG-126	ERK1 and ERK2 phosphorylation inhibitor
212	56.51	BRD-K49671696	ketanserin	Serotonin receptor antagonist
213	56.45	BRD-K53561341	KIN001-220	Aurora kinase inhibitor
214	56.37	BRD-K26818574	BIX-01294	Histone lysine methyltransferase inhibitor
215	55.87	BRD-K22947005	dexbrompheniramine	Histamine receptor antagonist
216	55.83	BRD-K55430733	WAY-629	Serotonin receptor agonist
217	55.81	BRD-K63343048	orlistat	Lipase inhibitor
218	55.48	BRD-K03642198	AY-9944	Hedgehog pathway modulator
219	55.34	BRD-K54233340	dorsomorphin	AMPK inhibitor
220	55.23	BRD-K50135270	GBR-12935	Dopamine uptake inhibitor
221	55.03	BRD-A65076780	dihydroergocristine	Adrenergic receptor antagonist
222	54.96	BRD-K12906962	dichlorobenzamil	Sodium/calcium exchange inhibitor
223	54.94	BRD-K48722258	dilazep	Adenosine reuptake inhibitor
224	54.64	BRD-A65280694	molindone	Dopamine receptor antagonist
225	54.49	BRD-K49027941	PSB-1115	Adenosine receptor antagonist
226	54.39	BRD-K27141178	SB-203186	Serotonin receptor antagonist
227	54.36	BRD-K42098891	protriptyline	Tricyclic antidepressant
228	54.32	BRD-K24859147	KIN001-242	Protein kinase inhibitor
229	54.23	BRD-K76907295	VU-0418947-2	HIF modulator
230	53.88	BRD-K37691127	hinokitiol	Tyrosinase inhibitor
231	53.81	BRD-K64517075	heliomycin	ATP synthase inhibitor
232	53.8	BRD-A51182606	chloramphenicol	Protein synthesis inhibitor
233	53.78	BRD-A09495397	bicuculline	GABA receptor antagonist
234	53.6	BRD-K41051431	mecillinam	Bacterial cell wall synthesis inhibitor
235	53.46	BRD-K93480852	KN-93	Calcium-calmodulin dependent protein kinase inhibitor
236	53.44	BRD-K67847053	guanabenz	Adrenergic receptor agonist
237	52.98	BRD-K04210847	tamoxifen	Estrogen receptor antagonist
238	52.84	BRD-K22878149	SB-205607	Delta 1 opioid receptor agonist
239	52.72	BRD-A49046702	SKF-89976A	GABA uptake inhibitor
240	52.68	BRD-K32610195	androstenedione	Cytochrome P450 inhibitor
241	52.64	BRD-K96720755	relcovaptan	Vasopressin receptor antagonist
242	52.61	BRD-K60690191	MPEP	Glutamate receptor antagonist
243	52.6	BRD-K74402642	NSC-632839	Ubiquitin specific protease inhibitor
244	52.55	BRD-K63641886	cefuroxime	Bacterial cell wall synthesis inhibitor
245	52.54	BRD-A08003242	rhodomyrtoxin-b	sodium fluorescein uptake inhibitor
246	52.36	BRD-A34205397	suloctidil	Adrenergic receptor antagonist
247	52.3	BRD-K74141488	naftifine	Fungal squalene epoxidase inhibitor
248	52.29	BRD-K78084463	W-12	Calmodulin antagonist
249	52.17	BRD-A12560204	nitrendipine	Calcium channel blocker
250	52.1	BRD-A01320529	salmeterol	Adrenergic receptor agonist
251	51.93	BRD-A25569250	KI-16425	Lysophosphatidic acid receptor antagonist
252	51.9	BRD-K53737926	amitriptyline	Norepinephrine inhibitor
253	51.86	BRD-K51018020	VAMA-37	DNA dependent protein kinase inhibitor
254	51.49	BRD-K04414442	SB-222200	Tachykinin antagonist
255	51.33	BRD-A84389633	tropanyl-3,5-dimethylbenzoate	Serotonin receptor antagonist
256	51.29	BRD-K19462402	buflomedil	Adrenergic receptor antagonist
257	51.25	BRD-U44618005	WH-4023	SRC inhibitor
258	51.25	BRD-K47869605	podophyllotoxin	Microtubule inhibitor
259	51.23	BRD-K62929068	6-benzylaminopurine	Purinergic receptor activator
260	51.22	BRD-A01295252	trans-7-hydroxy-pipat	Dopamine receptor ligand
261	51.18	BRD-A43331270	niguldipine	Calcium channel blocker
262	51.06	BRD-K48722833	iloperidone	Dopamine receptor antagonist
263	50.94	BRD-K35240538	methylprednisolone	Glucocorticoid receptor agonist
264	50.93	BRD-K40992116	parachlorophenol	Anti-infective
265	50.79	BRD-K70881766	solanine	Acetylcholinesterase inhibitor
266	50.79	BRD-K15108141	gemcitabine	Ribonucleotide reductase inhibitor
267	50.73	BRD-K96271548	coumaric-acid	Antioxidant
268	50.62	BRD-K74761218	WT-171	HDAC inhibitor
269	50.56	BRD-K74305673	IKK-2-inhibitor-V	IKK inhibitor
270	50.27	BRD-K00627859	tubastatin-a	HDAC inhibitor
271	50.22	BRD-A01787639	naftopidil	Adrenergic receptor antagonist
272	50.19	BRD-A42423104	benproperine	Antitussive
273	50.04	BRD-K13646352	midostaurin	FLT3 inhibitor
274	49.9	BRD-A45498368	WYE-125132	MTOR inhibitor
275	49.86	BRD-K84955386	hyperoside	Glucosidase inhibitor
276	49.77	BRD-A31159102	fluoxetine	Selective serotonin reuptake inhibitor (SSRI)
277	49.65	BRD-K26801045	pipamperone	Dopamine receptor antagonist
278	49.63	BRD-K22662435	ganciclovir	DNA polymerase inhibitor
279	49.58	BRD-A47513740	calyculin	Protein phosphatase inhibitor
280	49.54	BRD-K75958195	pizotifen	Serotonin receptor antagonist
281	49.42	BRD-K79877282	PF-543	Sphingosine kinase inhibitor
282	49.39	BRD-K77908580	entinostat	HDAC inhibitor
283	49.3	BRD-K67174588	toremifene	Estrogen receptor antagonist
284	49.26	BRD-K55044200	amoxicillin	Penicillin binding protein inhibitor
285	49.19	BRD-A81177136	KN-62	Calcium-calmodulin dependent protein kinase inhibitor
286	49.16	BRD-K22503835	scriptaid	HDAC inhibitor
287	49.06	BRD-K36377456	marmesin	Angiogenesis inhibitor
288	48.75	BRD-K81418486	vorinostat	HDAC inhibitor
289	48.53	BRD-K35531059	molsidomine	Guanylyl cyclase activator
290	48.33	BRD-A31195449	TCB2	Serotonin receptor agonist
291	48.26	BRD-K34508425	KUC103898N	-666
292	48.19	BRD-A11813248	AM-92016	Potassium channel blocker
293	48.18	BRD-K81855038	roxatidine	Histamine receptor antagonist
294	48.16	BRD-K30677119	PP-30	RAF inhibitor
295	48.13	BRD-A20239487	atenolol	Adrenergic receptor antagonist
296	47.93	BRD-K11853856	PJ-34	PARP inhibitor
297	47.84	BRD-K63550407	erythromycin	NFkB pathway inhibitor
298	47.81	BRD-A66927094	nemonapride	Dopamine receptor antagonist
299	47.78	BRD-A71262238	nafadotride	Dopamine receptor antagonist
300	47.69	BRD-K62792802	LY-83583	Guanylyl cyclase inhibitor
301	47.63	BRD-K54665485	R-59022	Diacylglycerol kinase inhibitor
302	47.34	BRD-A41692738	TGX-221	PI3K inhibitor
303	46.69	BRD-A55484088	BNTX	Opioid receptor antagonist
304	46.66	BRD-K05181463	L-741626	Dopamine receptor antagonist
305	46.62	BRD-K26997899	SA-792574	Microtubule inhibitor
306	46.6	BRD-K08619838	tremorine	Acetylcholine receptor agonist
307	46.43	BRD-K15519488	CS-110266	Dopamine receptor agonist
308	46.22	BRD-K27499107	carbacyclin	IP receptor activator
309	46.19	BRD-U86922168	QL-XII-47	BTK inhibitor
310	46.05	BRD-K21680192	mitoxantrone	Topoisomerase inhibitor
311	45.92	BRD-A01346607	flumetasone	Glucocorticoid receptor agonist
312	45.72	BRD-K33312228	halometasone	Glucocorticoid receptor agonist
313	45.48	BRD-K49481516	galantamine	Acetylcholinesterase inhibitor
314	45.39	BRD-K79145749	dibenzepin	Norepinephrine reuptake inhibitor
315	45.35	BRD-A32836748	leu-enkephalin	Opioid receptor agonist
316	45.3	BRD-K25504083	cytochalasin-d	Actin polymerization inhibitor
317	45.15	BRD-K39733634	L-161982	Prostanoid receptor antagonist
318	45.12	BRD-A31575449	CGP-20712	Adrenergic receptor antagonist
319	44.81	BRD-K18787491	U-0126	MEK inhibitor
320	44.66	BRD-K66019333	oxantel	Anthelmintic
321	44.58	BRD-K49945136	GR-113808	Serotonin receptor antagonist
322	44.21	BRD-A20589515	dihydroxyphenylglycine	Glutamate receptor agonist
323	44.19	BRD-A10977446	carvedilol	Adrenergic receptor antagonist
324	44.15	BRD-A17448384	beclometasone	Glucocorticoid receptor agonist
325	43.91	BRD-A02333338	cyclopamine	Smoothened receptor antagonist
326	43.87	BRD-A49160188	donepezil	Acetylcholinesterase inhibitor
327	43.87	BRD-K46424862	hymecromone	Monoamine oxidase inhibitor
328	43.67	BRD-K50168500	canertinib	EGFR inhibitor
329	43.63	BRD-K89274813	DMP-543	Acetylcholine release stimulant
330	43.52	BRD-K60640630	mometasone	Glucocorticoid receptor agonist
331	43.37	BRD-K20338176	cefaclor	Bacterial cell wall synthesis inhibitor
332	43.33	BRD-K99696746	fatostatin	SREBP inhibitor
333	43.28	BRD-K02227374	milnacipran	Serotonin reuptake inhibitor
334	43.2	BRD-A33447119	oxfendazole	Anthelmintic
335	42.99	BRD-K73991644	isoquercetin	Aldose reductase inhibitor
336	42.96	BRD-K87573634	propylpyrazole	Estrogen receptor agonist
337	42.89	BRD-K66412701	pazufloxacin	Topoisomerase inhibitor
338	42.87	BRD-K79404599	enzastaurin	PKC inhibitor
339	42.85	BRD-A02176148	tubaic-acid	Mitochondrial complex I inhibitor
340	42.68	BRD-K37289225	clozapine	Dopamine receptor antagonist
341	42.35	BRD-K39462424	dexchlorpheniramine	Histamine receptor antagonist
342	42.31	BRD-K87510569	RS-504393	CC chemokine receptor antagonist
343	42.12	BRD-K40901640	cinanserin	Serotonin receptor antagonist
344	41.95	BRD-K67783091	haloperidol	Dopamine receptor antagonist
345	41.88	BRD-K68873215	phosphodiesterase-V-inhibitor-II	Phosphodiesterase inhibitor
346	41.76	BRD-K40645748	mefloquine	Adenosine receptor antagonist
347	41.67	BRD-K97863768	prothionamide	Mycobacterium tuberculosis enoyl-[acyl-carrier-protein] reductase [NADH] (inhA) inhibitor
348	41.65	BRD-A92670106	tocainide	Sodium channel blocker
349	41.43	BRD-K21806131	tegaserod	Serotonin receptor partial agonist
350	41.01	BRD-A33711280	metixene	Acetylcholine receptor antagonist
351	41	BRD-K38615104	A-443644	AKT inhibitor
352	40.94	BRD-K07736136	VX-702	p38 MAPK inhibitor
353	40.93	BRD-K59962020	CHEMBL-374350	NFkB pathway inhibitor
354	40.88	BRD-K16277217	piperacetazine	Dopamine receptor antagonist
355	40.71	BRD-A72483914	spiroxatrine	Serotonin receptor antagonist
356	40.68	BRD-A43849199	karakoline	Phytotoxin
357	40.43	BRD-K17378184	prestwick-559	Dopamine receptor agonist
358	40.32	BRD-M72442222	vicriviroc	CC chemokine receptor antagonist
359	40.23	BRD-K00662280	CL-218872	GABA receptor agonist
360	40.22	BRD-A33168282	sotalol	Adrenergic receptor antagonist
361	40.05	BRD-K15588452	R-96544	Serotonin receptor antagonist
362	39.99	BRD-K57546357	prunetin	Breast cancer resistance protein inhibitor
363	39.98	BRD-A65767837	hydrocortisone	Glucocorticoid receptor agonist
364	39.55	BRD-A22844106	tenoxicam	Cyclooxygenase inhibitor
365	39.53	BRD-K53263234	CITCO	CAR agonist
366	39.5	BRD-K71512533	SNS-314	Aurora kinase inhibitor
367	39.45	BRD-K94176593	TWS-119	Glycogen synthase kinase inhibitor
368	39.37	BRD-K73319509	PF-04217903	c-Met inhibitor
369	39.11	BRD-K63913457	eicosatrienoic-acid	Vasodilator
370	38.92	BRD-A96799240	4-hydroxyretinoic-acid	Retinoid receptor binder
371	38.85	BRD-K68997413	PF-3845	FAAH inhibitor
372	38.83	BRD-A48257147	PHCCC	Glutamate receptor agonist
373	38.72	BRD-K06750613	GSK-1059615	PI3K inhibitor
374	38.7	BRD-K65910366	KUC103904N	-666
375	38.68	BRD-A70407468	PSB-36	Adenosine receptor antagonist
376	38.61	BRD-K10467831	tibolone	Androgen receptor agonist
377	38.4	BRD-A50311610	meclozine	CAR agonist
378	38.34	BRD-K81376179	TCS-359	FLT3 inhibitor
379	38.19	BRD-A05186015	bupropion	Dopamine uptake inhibitor
380	38.07	BRD-K79366068	PSB-069	NTPDase inhibitor
381	38.04	BRD-K82941592	rosuvastatin	HMGCR inhibitor
382	38.02	BRD-A67748489	K3644	Kinesin-like spindle protein inhibitor
383	37.85	BRD-K66896231	BRD-K66896231	Acetylcholinesterase inhibitor
384	37.84	BRD-K47679368	bromfenac	Cyclooxygenase inhibitor
385	37.72	BRD-A52193669	withaferin-a	IKK inhibitor
386	37.72	BRD-A01643550	prednisolone	Glucocorticoid receptor agonist
387	37.7	BRD-K97509413	coumestrol	Estrogen receptor agonist
388	37.7	BRD-K27710560	splitomycin	SIRT inhibitor
389	37.69	BRD-K19796430	erismodegib	Smoothened receptor antagonist
390	37.42	BRD-K61691971	avrainvillamide-analog-1	nucleophosmin inhibitor
391	37.42	BRD-K11927976	ER-27319	Mediator release inhibitor
392	37.34	BRD-K43880410	pregnenolone	glutamate receptor modulator
393	37.28	BRD-K83837640	JNJ-26854165	HDAC inhibitor
394	37.28	BRD-K31633810	DAU-5884	Acetylcholine receptor antagonist
395	37.27	BRD-K06159959	CCMQ	Inhibitor of the binding of homoquinolinic acid to non-NMDA sensitive sites
396	37.21	BRD-K53790871	triamcinolone	Glucocorticoid receptor agonist
397	37.08	BRD-K91904471	SD-169	p38 MAPK inhibitor
398	37.07	BRD-K03406345	azacitidine	DNA methyltransferase inhibitor
399	36.89	BRD-K23192422	lestaurtinib	FLT3 inhibitor
400	36.79	BRD-K77286328	reversine	Aurora kinase inhibitor
401	36.7	BRD-A45140972	meclocycline	Bacterial 30S ribosomal subunit inhibitor
402	36.54	BRD-U66370498	androstanol	CAR antagonist
403	36.53	BRD-A18497530	5-iodotubercidin	Adenosine kinase inhibitor
404	36.38	BRD-K41996876	tyrphostin-1	EGFR inhibitor
405	36.18	BRD-A25067867	benzatropine	Acetylcholine receptor antagonist
406	36.14	BRD-K41160163	fenobam	Glutamate receptor antagonist
407	35.82	BRD-K88304388	dextrorphan	Glutamate receptor antagonist
408	35.8	BRD-A92177080	betamethasone	Glucocorticoid receptor agonist
409	35.69	BRD-K39987650	bisacodyl	Laxative
410	35.5	BRD-K42748308	XE-991	Potassium channel blocker
411	35.47	BRD-K59331372	SB-366791	TRPV antagonist
412	35.25	BRD-K09497549	kawain	Calcium channel modulator
413	35.11	BRD-A36074203	remacemide	Glutamate receptor antagonist
414	34.79	BRD-A15914070	4-hydroxy-2-nonenal	Cytotoxic lipid peroxidation product
415	34.72	BRD-K80451230	zamifenacin	Acetylcholine receptor antagonist
416	34.66	BRD-K21548250	moracizine	Sodium channel blocker
417	34.62	BRD-A09539288	homatropine	Acetylcholine receptor antagonist
418	34.59	BRD-K52930707	rescinnamine	ACE inhibitor
419	34.57	BRD-K41868777	W-5	Calmodulin antagonist
420	34.52	BRD-U33728988	QL-X-138	MTOR inhibitor
421	34.49	BRD-K00603606	ticlopidine	Purinergic receptor antagonist
422	34.46	BRD-K66782112	BRD-K66782112	Histamine receptor antagonist
423	34.41	BRD-K15567136	papaverine	Phosphodiesterase inhibitor
424	34.39	BRD-A84189516	baccatin-III	Paclitaxel precursor
425	34.31	BRD-K71266197	PSB-06126	NTPDase inhibitor
426	34.17	BRD-K88358234	xaliproden	Serotonin receptor agonist
427	34.11	BRD-K48029790	OBAA	Phospholipase inhibitor
428	34.04	BRD-K41410256	balsalazide	Cyclooxygenase inhibitor
429	34.03	BRD-K87990216	piretanide	Glucocorticoid receptor agonist
430	33.88	BRD-A92585442	RU-28318	Cytochrome P450 inhibitor
431	33.64	BRD-K86509404	iso-olomoucine	CDK inhibitor
432	33.44	BRD-K43245338	MDL-28170	Calpain inhibitor
433	33.37	BRD-K80315159	DPPE	Histamine receptor antagonist
434	33.3	BRD-K13261168	LY-16350	Dopamine receptor agonist
435	33.3	BRD-K43796186	benzyl-quinazolin-4-yl-amine	EGFR inhibitor
436	33.29	BRD-K47598052	PP-1	SRC inhibitor
437	33.15	BRD-A99449986	MT-21	Caspase activator
438	33.06	BRD-K65503129	HSP90-inhibitor	HSP inhibitor
439	33.03	BRD-A14208071	oxyphenonium	Cholinergic receptor antagonist
440	33.01	BRD-K92991072	PAC-1	Caspase activator
441	33	BRD-A41519720	ezetimibe	Niemann-Pick C1-like 1 protein antagonist
442	32.99	BRD-K61269089	daphnetin	Protein kinase inhibitor
443	32.95	BRD-A53576514	orphenadrine	Acetylcholine receptor antagonist
444	32.93	BRD-A43930669	L-368899	Oxytocin receptor antagonist
445	32.79	BRD-K79602928	metformin	Insulin sensitizer
446	32.74	BRD-A61856038	tremulacin	Lipoxygenase inhibitor
447	32.74	BRD-A29082194	gitoxigenin	ATPase inhibitor
448	32.73	BRD-K04548931	pidorubicine	Topoisomerase inhibitor
449	32.7	BRD-K79092138	nitrofural	Bacterial DNA inhibitor
450	32.69	BRD-A71459254	cymarin	ATPase inhibitor
451	32.46	BRD-A84702196	penicillin	Bacterial cell wall synthesis inhibitor
452	32.44	BRD-K21936341	oxotremorine	Acetylcholine receptor agonist
453	32.24	BRD-K92723993	imatinib	BCR-ABL kinase inhibitor
454	32.15	BRD-K73589401	corticosterone	mineralocorticoid receptor agonist
455	32.15	BRD-K20141153	atomoxetine	Norepinephrine transporter inhibitor
456	32.12	BRD-A72988804	tiaprofenic-acid	Cyclooxygenase inhibitor
457	31.97	BRD-K06147391	telenzepine	Acetylcholine receptor antagonist
458	31.92	BRD-K12867552	THM-I-94	HDAC inhibitor
459	31.86	BRD-K40255344	tyrphostin-A9	Protein tyrosine kinase inhibitor
460	31.81	BRD-K08554278	bisbenzimide	DNA binding agent
461	31.8	BRD-A18917088	estradiol	Contraceptive agent
462	31.68	BRD-K83963101	MLN-8054	Aurora kinase inhibitor
463	31.65	BRD-K73395020	SA-1478088	-666
464	31.53	BRD-K45033733	famciclovir	DNA polymerase inhibitor
465	31.53	BRD-K28360340	TW-37	BCL inhibitor
466	31.41	BRD-K94830329	ataluren	CFTR channel agonist
467	31.39	BRD-K28428262	brivanib	FGFR inhibitor
468	31.37	BRD-A54236247	racephedrine	Adrenergic receptor agonist
469	31.28	BRD-K06014311	DH-97	Melatonin receptor antagonist
470	31.26	BRD-K28849549	mesalazine	Cyclooxygenase inhibitor
471	31.26	BRD-K12002134	megestrol	progesterone receptor agonist
472	31.22	BRD-A63043573	cabergoline	Dopamine receptor agonist
473	31.21	BRD-A11605036	thiocolchicoside	GABA receptor antagonist
474	30.76	BRD-K52219182	BRD-K52219182	Phosphodiesterase inhibitor
475	30.72	BRD-A16754160	ampicillin	Bacterial cell wall synthesis inhibitor
476	30.57	BRD-A29289453	PCA-4248	Platelet activating factor receptor antagonist
477	30.57	BRD-K46937689	phenazone	Cyclooxygenase inhibitor
478	30.52	BRD-A02713983	dihydrodeoxygedunin	Growth factor receptor activator
479	30.49	BRD-K51677086	erythromycin	NFkB pathway inhibitor
480	30.17	BRD-K33572481	taurodeoxycholic-acid	Bile acid
481	30.16	BRD-K35430135	SR-59230A	Adrenergic receptor antagonist
482	30.14	BRD-K86887724	dofetilide	Potassium channel blocker
483	30.1	BRD-K35573744	erbstatin-analog	EGFR inhibitor
484	29.71	BRD-K53979406	ALX-5407	Glycine transporter inhibitor
485	29.68	BRD-K43389675	daunorubicin	RNA synthesis inhibitor
486	29.46	BRD-M07438658	lapatinib	EGFR inhibitor
487	29.33	BRD-K51313569	palbociclib	CDK inhibitor
488	29.21	BRD-A32161980	carbetocin	Oxytocin receptor agonist
489	29.17	BRD-K47659338	EMD-386088	Serotonin receptor agonist
490	28.77	BRD-K57179821	crotamiton	Antipruritic
491	28.71	BRD-K23383398	T-0901317	LXR agonist
492	28.67	BRD-K14920963	erythrosine	Coloring agent
493	28.65	BRD-K46556543	canrenoic-acid	Mineralocorticoid receptor antagonist
494	28.64	BRD-A64297288	amlodipine	Calcium channel blocker
495	28.62	BRD-A93424738	dexamethasone	Glucocorticoid receptor agonist
496	28.57	BRD-K13211965	L-741742	Dopamine receptor antagonist
497	28.51	BRD-A37837077	cyclazosin	Adrenergic receptor antagonist
498	28.5	BRD-K13390322	AT-7519	CDK inhibitor
499	28.48	BRD-K95885906	quercetagetin	PIM inhibitor
500	28.29	BRD-K94379058	BML-190	Cannabinoid receptor inverse agonist
501	28.24	BRD-K33453211	levocabastine	Histamine receptor antagonist
502	28.24	BRD-K44432556	VU-0418946-1	HIF modulator
503	28.16	BRD-A00267231	hemado	Adenosine receptor agonist
504	28.15	BRD-K19284129	salvinorin-a	Opioid receptor agonist
505	28.05	BRD-A03816571	CP-55940	Cannabinoid receptor agonist
506	28.01	BRD-A73581086	ergometrine	Adrenergic receptor agonist
507	27.97	BRD-K73999723	telmisartan	Angiotensin receptor antagonist
508	27.96	BRD-A53077924	tianeptine	Selective serotonin reuptake enhancer (SSRE)
509	27.95	BRD-K40530731	hyoscyamine	Acetylcholine receptor antagonist
510	27.85	BRD-K54330070	SB-202190	p38 MAPK inhibitor
511	27.81	BRD-K06234293	LY-364947	TGF beta receptor inhibitor
512	27.64	BRD-A41833852	naloxone	Opioid receptor antagonist
513	27.4	BRD-K18523449	mestanolone	Androgenic steroid
514	27.37	BRD-K95609758	BMS-191011	Potassium channel activator
515	27.33	BRD-A86044036	flurbiprofen	Cyclooxygenase inhibitor
516	27.32	BRD-K85871428	SC-68376	p38 MAPK inhibitor
517	27.3	BRD-A60245366	AS-601245	JNK inhibitor
518	27.3	BRD-A17411484	carprofen	Cyclooxygenase inhibitor
519	27.27	BRD-K72034655	peucedanin	Apoptosis stimulant
520	27.22	BRD-K08589866	linsitinib	IGF-1 inhibitor
521	27.1	BRD-A74907996	equol	Estrogen receptor agonist
522	26.94	BRD-A68589262	troxipide	Glucosamine synthetase stimulant
523	26.93	BRD-K61341215	vecuronium	Acetylcholine receptor antagonist
524	26.88	BRD-K86191271	cytosporone-b	NUR77 receptor agonist
525	26.86	BRD-K23204545	busulfan	DNA inhibitor
526	26.85	BRD-K24132293	piperlongumine	Glutathione transferase inhibitor
527	26.81	BRD-K32536677	AGK-2	SIRT inhibitor
528	26.68	BRD-A84174393	meloxicam	Cyclooxygenase inhibitor
529	26.66	BRD-K10042277	desmethylclozapine	Acetylcholine receptor agonist
530	26.62	BRD-K49669041	BX-912	Pyruvate dehydrogenase kinase inhibitor
531	26.44	BRD-K30743633	TCPOBOP	CAR agonist
532	26.39	BRD-K29113274	ketoconazole	Sterol demethylase inhibitor
533	26.34	BRD-K68407802	KIN001-055	EGFR inhibitor
534	26.03	BRD-K12102668	nialamide	Monoamine oxidase inhibitor
535	26	BRD-K50214219	CS-1657	PARP inhibitor
536	25.93	BRD-K40619305	larixinic-acid	Compound that interacts with metal centers
537	25.83	BRD-K51476772	ST-638	Tyrosine kinase inhibitor
538	25.79	BRD-K64044582	linoleamide	ACAT inhibitor
539	25.79	BRD-K87909389	alvocidib	CDK inhibitor
540	25.78	BRD-K83010055	VU-0415374-1	Glutamate receptor modulator
541	25.61	BRD-A49358627	ciprofibrate	PPAR receptor agonist
542	25.59	BRD-A85472596	L-670596	Prostanoid receptor antagonist
543	25.55	BRD-K14993104	bemegride	Chemoreceptor agonist
544	25.5	BRD-K15196155	IBC-293	Hydroxycarboxylic acid receptor agonist
545	25.48	BRD-K50422030	clomethiazole	GABA receptor antagonist
546	25.44	BRD-K07303502	arachidonyl-trifluoro-methane	Cytosolic phospholipase inhibitor
547	25.41	BRD-K94841585	emodic-acid	Laxative
548	25.41	BRD-K47207162	zimelidine	Serotonin reuptake inhibitor
549	25.39	BRD-K47780086	penciclovir	DNA directed DNA polymerase inhibitor
550	25.13	BRD-K54256913	MK-1775	WEE1 kinase inhibitor
551	24.93	BRD-A55369275	CGP-54626	GABA receptor antagonist
552	24.93	BRD-A37776212	ICI-204448	Opioid receptor agonist
553	24.83	BRD-A16444946	acarbose	Glucosidase inhibitor
554	24.78	BRD-K31471398	dihydrexidine	Dopamine receptor agonist
555	24.68	BRD-K91442916	CAM-9-026	Membrane metalloendopeptidase inhibitor
556	24.65	BRD-A62057054	MDL-11939	Serotonin receptor antagonist
557	24.59	BRD-A17453586	MDL-72832	Serotonin receptor agonist
558	24.59	BRD-K18742343	H-8	PKA inhibitor
559	24.58	BRD-A38747044	KU-14R	Imidazoline receptor ligand
560	24.57	BRD-K62200014	anagrelide	Phosphodiesterase inhibitor
561	24.55	BRD-K94144010	cotinine	Nicotine metabolite
562	24.5	BRD-A41250306	cyclopenthiazide	Thiazide diuretic
563	24.47	BRD-K67637637	olopatadine	Histamine receptor antagonist
564	24.28	BRD-K32412559	morphothebaine	Adrenergic receptor antagonist
565	24.26	BRD-K43736954	cortisone	Glucocorticoid receptor agonist
566	24.2	BRD-K93460210	lamotrigine	Serotonin receptor antagonist
567	24.19	BRD-K59773493	benzohydroxamic-acid	Antifungal
568	24.17	BRD-K33226500	indinavir	HIV protease inhibitor
569	24.14	BRD-A96897502	U-74389F	Lipid peroxidase inhibitor
570	24.11	BRD-A35989968	megestrol	Progesterone receptor agonist
571	24.09	BRD-U01690642	acetyl-geranyl-cysteine	Isoprenylated protein methylation inhibitor
572	24.06	BRD-A26097136	bulleyaconitine-a	Non-opiod analgesic
573	24.05	BRD-A73909368	dactinomycin	RNA polymerase inhibitor
574	23.98	BRD-K32164935	tolazamide	ATP channel blocker
575	23.95	BRD-A47633927	NPC-15199	ICAM1 antagonist
576	23.92	BRD-K58772419	AZD-6482	PI3K inhibitor
577	23.89	BRD-K51941867	LM-1685	Cyclooxygenase inhibitor
578	23.87	BRD-A54490543	pirlindole	Monoamine oxidase inhibitor
579	23.73	BRD-K39823328	VU-0366037-2	Glutamate receptor modulator
580	23.63	BRD-K13927029	retinol	Retinoid receptor ligand
581	23.62	BRD-K07212038	selinidin	Mast cell stabilizer
582	23.62	BRD-K43068349	AMG-9810	TRPV antagonist
583	23.59	BRD-K05737787	isoeugenol	Nitric oxide production inhibitor
584	23.57	BRD-K15715913	fluperlapine	Serotonin receptor antagonist
585	23.56	BRD-K02283807	GR-32191	Thromboxane receptor antagonist
586	23.3	BRD-K54708045	nTZDpa	PPAR receptor agonist
587	23.24	BRD-A92439610	triamcinolone	Glucocorticoid receptor agonist
588	23.08	BRD-K17705806	JTC-801	Opioid receptor antagonist
589	23.08	BRD-K54094468	remoxipride	Dopamine receptor antagonist
590	23.07	BRD-A15493168	tetracycline	Bacterial 30S ribosomal subunit inhibitor
591	22.99	BRD-A85234536	N6-cyclopentyladenosine	Adenosine receptor agonist
592	22.94	BRD-K54704028	BAY-36-7620	Glutamate receptor antagonist
593	22.87	BRD-K94689771	pinocembrin	CYP1B1 inhibitor
594	22.85	BRD-K92428232	GSK-461364	PLK inhibitor
595	22.82	BRD-K85090592	pilocarpine	Acetylcholine receptor agonist
596	22.71	BRD-A39415247	norethisterone	Progesterone receptor agonist
597	22.61	BRD-A13946108	sulindac	Cyclooxygenase inhibitor
598	22.6	BRD-K30990140	FR-122047	Cyclooxygenase inhibitor
599	22.55	BRD-K33308633	INCA-6	Calcineurin inhibitor
600	22.53	BRD-K28761384	zuclopenthixol	Dopamine receptor antagonist
601	22.5	BRD-K69688083	mestinon	Cholinesterase inhibitor
602	22.46	BRD-K75532464	FTI-276	Farnesyltransferase inhibitor
603	22.31	BRD-K72676686	fluvoxamine	Selective serotonin reuptake inhibitor (SSRI)
604	22.26	BRD-K45446451	JZL-184	Monoacylglucerol lipase inhibitor
605	22.14	BRD-A36217750	sulfinpyrazone	Uricosuric blocker
606	22.1	BRD-K18619710	digoxigenin	Steroid
607	22.01	BRD-A15297126	fluocinonide	Glucocorticoid receptor agonist
608	21.97	BRD-K83794624	pirarubicin	Topoisomerase inhibitor
609	21.91	BRD-K13642330	cosmosiin	Cytochrome P450 inhibitor
610	21.88	BRD-A43940795	tetrahydropalmatine	Serotonin release inhibitor
611	21.79	BRD-K32710582	EI-247	IGF-1 inhibitor
612	21.71	BRD-K92093830	doxorubicin	Topoisomerase inhibitor
613	21.67	BRD-K50660797	epicatechin	Bacterial DNA gyrase inhibitor
614	21.63	BRD-K82795137	loratadine	Histamine receptor antagonist
615	21.59	BRD-K91699951	benzonatate	Local anesthetic
616	21.54	BRD-K14888893	minoxidil	KATP activator
617	21.53	BRD-A88254928	salbutamol	Adrenergic receptor agonist
618	21.47	BRD-K43468059	byssochlamic-acid	Mycotoxin
619	21.36	BRD-K77793136	hydroxyfasudil	Rho associated kinase inhibitor
620	21.34	BRD-A24817035	laudanosine	Central nervous system agent
621	21.33	BRD-K31238592	devazepide	CCK receptor antagonist
622	21.33	BRD-A18620900	estriol	Estrogen receptor agonist
623	21.22	BRD-K42573370	avrainvillamide-analog-2	nucleophosmin inhibitor
624	21.22	BRD-K74212935	ergocryptine	Dopamine agonist
625	21.2	BRD-K10860596	granisetron	Serotonin receptor antagonist
626	21.1	BRD-K34098590	tienilic-acid	Sodium/potassium/chloride transporter inhibitor
627	21.09	BRD-A64125466	dehydrocholic-acid	choleretic agent
628	21.06	BRD-K78373679	RO-3306	CDK inhibitor
629	21.02	BRD-A92630576	trimebutine	Opioid receptor agonist
630	21.01	BRD-K20197062	SA-94315	Caspase inhibitor
631	21.01	BRD-K71103788	duloxetine	Serotonin reuptake inhibitor
632	20.98	BRD-A28746609	paclitaxel	Tubulin inhibitor
633	20.96	BRD-K70577657	H-9	PKA inhibitor
634	20.96	BRD-K30649484	mafenide	Carbonic anhydrase inhibitor
635	20.93	BRD-K08206212	entecavir	Reverse transcriptase inhibitor
636	20.83	BRD-K82983861	GW-0742	PPAR receptor agonist
637	20.82	BRD-K00312224	PPT	Estrogen receptor agonist
638	20.78	BRD-A83937277	mephenytoin	Hydantoin antiepileptic
639	20.73	BRD-A07000685	hydrocortisone	Glucocorticoid receptor agonist
640	20.71	BRD-K09631521	thiotepa	Cytochrome P450 inhibitor
641	20.67	BRD-K14767410	SC-560	Cyclooxygenase inhibitor
642	20.56	BRD-K63516691	T-0156	Phosphodiesterase inhibitor
643	20.27	BRD-K73391359	quinisocaine	Local anesthetic
644	20.26	BRD-K76698671	HNHA	HDAC inhibitor
645	20.25	BRD-A50675702	fipronil	GABA gated chloride channel blocker
646	20.24	BRD-K66788707	fludarabine	DNA synthesis inhibitor
647	20.23	BRD-A87387433	cefpodoxime	Bacterial cell wall synthesis inhibitor
648	20.04	BRD-A76279427	myriocin	Serine palmitoyltransferase inhibitor
649	20.01	BRD-K78122587	NNC-55-0396	T-type calcium channel blocker
650	19.92	BRD-A55913614	primaquine	Antimalarial
651	19.92	BRD-A66199457	asiaticoside	Antineoplastic
652	19.76	BRD-A88282067	delcorine	Antiarrhythmic
653	19.74	BRD-K92428153	mycophenolate-mofetil	Dehydrogenase inhibitor
654	19.69	BRD-K76274772	MAPP-D-erythro	Ceramidase inhibitor
655	19.65	BRD-A16665823	butoconazole	Bacterial cell wall synthesis inhibitor
656	19.58	BRD-A95696820	acadesine	AMPK activator
657	19.48	BRD-A90799790	isradipine	Calcium channel blocker
658	19.39	BRD-K67352070	TC-2559	Acetylcholine receptor agonist
659	19.33	BRD-A00758722	noretynodrel	Progestogen hormone
660	19.33	BRD-K15592317	CP466722	ATM kinase inhibitor
661	19.3	BRD-A90131694	alclometasone	Glucocorticoid receptor agonist
662	19.17	BRD-K42500029	CGP-57380	MAP kinase inhibitor
663	19.16	BRD-K42142750	retrorsine	Antimitotic
664	19.12	BRD-K03600606	catechin	Beta secretase inhibitor
665	19.08	BRD-A05352148	ipratropium	Acetylcholine receptor antagonist
666	19.04	BRD-A69917777	aminopentamide	Acetylcholine receptor antagonist
667	19.01	BRD-A45499626	UBP-302	Glutamate receptor antagonist
668	19	BRD-K47936004	piribedil	Dopamine receptor agonist
669	19	BRD-K22193694	dioxybenzone	Topical sunscreen agent
670	18.98	BRD-K26429091	J-104129	Acetylcholine receptor antagonist
671	18.93	BRD-K89402695	L-655240	Thromboxane receptor antagonist
672	18.89	BRD-K36153907	KU-C103885	Cystic fibrosis transmembrane conductance regulator inhibitor
673	18.89	BRD-K68132782	terbinafine	Fungal squalene epoxidase inhibitor
674	18.81	BRD-K04412738	tramadol	Norepinephrine reuptake inhibitor
675	18.8	BRD-A27554692	altrenogest	Progestogen hormone
676	18.72	BRD-K39621635	artemether	Antimalarial
677	18.71	BRD-K65639003	icariin	Phosphodiesterase inhibitor
678	18.7	BRD-K38251852	paxilline	Potassium channel blocker
679	18.69	BRD-K26573499	DMAB-anabaseine	Adrenergic receptor agonist
680	18.67	BRD-A19248578	latrunculin-b	Actin polymerization inhibitor
681	18.66	BRD-K52080565	rilmenidine	Imidazoline receptor agonist
682	18.65	BRD-A09533288	verapamil	Calcium channel blocker
683	18.65	BRD-A45889380	mepacrine	Cytokine production inhibitor
684	18.64	BRD-A09828896	SKF-81297	Dopamine receptor agonist
685	18.61	BRD-A35588707	teniposide	Topoisomerase inhibitor
686	18.5	BRD-K94919853	10H-phenothiazin-10-yl)(p-tolyl)methanone	Butyrylcholinesterase inhibitor
687	18.49	BRD-K00532621	midazolam	Benzodiazepine receptor agonist
688	18.49	BRD-A17655518	ibuprofen	Cyclooxygenase inhibitor
689	18.48	BRD-K70778732	trazodone	Adrenergic receptor antagonist
690	18.46	BRD-K88789588	letrozole	Aromatase inhibitor
691	18.45	BRD-K50938786	ropivacaine	Sodium channel blocker
692	18.43	BRD-K06388322	pramipexole	Dopamine receptor agonist
693	18.39	BRD-K23623876	decafluorobutane	Contrast agent
694	18.36	BRD-K31283835	tofacitinib	JAK inhibitor
695	18.29	BRD-A01317026	7,8-dihydro-L-biopterin	Dihydroneopterin aldolase inhibitor
696	18.28	BRD-K26521938	dinoprostone	Prostanoid receptor agonist
697	18.23	BRD-K59637651	NSC-119889	Protein synthesis inhibitor
698	18.21	BRD-K30697463	desoximetasone	Glucocorticoid receptor agonist
699	18.13	BRD-K52850071	JAK3-Inhibitor-II	JAK inhibitor
700	18.04	BRD-K54529596	captopril	ACE inhibitor
701	17.99	BRD-K69650333	idarubicin	Topoisomerase inhibitor
702	17.96	BRD-K46469693	SCH-442416	Adenosine receptor antagonist
703	17.95	BRD-K96402602	farnesylthiotriazole	PPMTase inhibitor
704	17.93	BRD-K29555132	arachidonamide	Cannabinoid receptor agonist
705	17.75	BRD-K31987754	oleylethanolamide	Cannabinoid receptor agonist
706	17.67	BRD-K14696368	9-methyl-5H-6-thia-4,5-diaza-chrysene-6,6-dioxide	NFkB pathway inhibitor
707	17.61	BRD-K27184429	levocetirizine	Histamine receptor antagonist
708	17.6	BRD-K28936863	ketotifen	Histamine receptor agonist
709	17.48	BRD-K92760278	riboflavin	Vitamin B
710	17.33	BRD-K48300629	zonisamide	Sodium channel blocker
711	17.24	BRD-K73838513	cinacalcet	Calcium channel activator
712	17.23	BRD-K96319534	phentermine	Dopamine uptake inhibitor
713	17.22	BRD-A97730597	hexylcaine	Sodium channel blocker
714	17.22	BRD-A65449987	flunisolide	Cytochrome P450 inhibitor
715	17.17	BRD-K60511616	pravastatin	HMGCR inhibitor
716	17.13	BRD-K56450366	NSC-94258	Antineoplastic
717	17.13	BRD-A39230911	chlorphensin	Muscle relaxant
718	17.11	BRD-K67439147	SIB-1893	Glutamate receptor antagonist
719	17.09	BRD-K14681867	somatostatin	Somatostatin receptor agonist
720	17.08	BRD-A83892713	rifampicin	RNA polymerase inhibitor
721	17.07	BRD-K75641298	metoclopramide	Dopamine receptor antagonist
722	17.01	BRD-K46317332	proadifen	Nitric oxide synthase inhibitor
723	16.95	BRD-A43671941	oxprenolol	Adrenergic receptor antagonist
724	16.91	BRD-K81128206	edrophonium	Acetylcholinesterase inhibitor
725	16.9	BRD-K28806945	L-750667	Dopamine receptor antagonist
726	16.87	BRD-K49890030	gavestinel	Glutamate receptor antagonist
727	16.85	BRD-A93000692	ciglitazone	PPAR receptor agonist
728	16.8	BRD-K22010301	JLK-6	Gamma secretase inhibitor
729	16.78	BRD-K62609077	scoulerine	Adrenergic receptor antagonist
730	16.75	BRD-K64157027	ZD-2079	Adrenergic receptor agonist
731	16.68	BRD-K40902647	vincamine	Adrenergic receptor antagonist
732	16.68	BRD-K84595254	strophanthidin	ATPase inhibitor
733	16.62	BRD-K44353683	nateglinide	Insulin secretagogue
734	16.62	BRD-K01292756	pimozide	Dopamine receptor antagonist
735	16.59	BRD-K04546108	JAK3-inhibitor-VI	JAK inhibitor
736	16.58	BRD-A72711497	lasalocid	Bacterial permeability inducer
737	16.57	BRD-K41445866	alfaxalone	Chloride channel agonist
738	16.56	BRD-A41145729	methoprene-acid	Retinoid receptor agonist
739	16.56	BRD-K33459542	ditolylguanidine	Sigma receptor agonist
740	16.56	BRD-A04553218	chlorphenamine	Histamine receptor antagonist
741	16.51	BRD-A20131130	2',5'-dideoxyadenosine	Adenylyl cyclase inhibitor
742	16.5	BRD-A26095496	clobetasol	Glucocorticoid receptor agonist
743	16.46	BRD-K81209159	herniarin	Acetylcholinesterase inhibitor
744	16.44	BRD-A15034104	bergenin	Interleukin inhibitor
745	16.41	BRD-A35108200	dexamethasone	Glucocorticoid receptor agonist
746	16.38	BRD-K96862998	pirfenidone	TGF beta receptor inhibitor
747	16.35	BRD-K55191674	benzylpenicillin	Penicillin binding protein inhibitor
748	16.33	BRD-K32836707	CAY-10577	Casein kinase inhibitor
749	16.31	BRD-K29905972	axitinib	PDGFR receptor inhibitor
750	16.31	BRD-K36198571	WAY-170523	Metalloproteinase inhibitor
751	16.3	BRD-K24201553	SB-269970	Serotonin receptor antagonist
752	16.3	BRD-K67043667	altretamine	DNA synthesis inhibitor
753	16.29	BRD-K97752965	nicorandil	Nitric oxide donor
754	16.29	BRD-K07237224	moclobemide	Monoamine oxidase inhibitor
755	16.25	BRD-K09186807	KIN001-244	Phosphoinositide dependent kinase inhibitor
756	16.22	BRD-K50866992	tropisetron	Serotonin receptor antagonist
757	16.12	BRD-A06390036	hydroquinidine	Antiarrhythmic
758	16.01	BRD-K86595100	chlordiazepoxide	Benzodiazepine receptor agonist
759	15.98	BRD-K16485616	mocetinostat	HDAC inhibitor
760	15.96	BRD-K46018455	bezafibrate	PPAR receptor agonist
761	15.95	BRD-K90574421	ipsapirone	Serotonin receptor agonist
762	15.94	BRD-A00520476	otenzepad	Acetylcholine receptor antagonist
763	15.94	BRD-K50417881	eticlopride	Dopamine receptor antagonist
764	15.92	BRD-K89210380	biotin	Vitamin B
765	15.89	BRD-K36638830	anabasine	Acetylcholine receptor agonist
766	15.85	BRD-K54142781	cirazoline	Adrenergic receptor agonist
767	15.77	BRD-K48935217	epothilone	Microtubule inhibitor
768	15.63	BRD-A79672927	tropicamide	Acetylcholine receptor antagonist
769	15.53	BRD-K32821942	azathioprine	Dehydrogenase inhibitor
770	15.48	BRD-K42095107	daidzein	Estrogen receptor agonist
771	15.47	BRD-K14880289	GW-501516	PPAR receptor agonist
772	15.46	BRD-A62184259	cycloheximide	Protein synthesis inhibitor
773	15.45	BRD-K81729199	AQ-RA741	Acetylcholine receptor antagonist
774	15.42	BRD-A10969569	ambelline	Plant alkaloid
775	15.32	BRD-K67977190	eprosartan	Angiotensin receptor antagonist
776	15.31	BRD-K39391626	ethylestrenol	Progesterone receptor agonist
777	15.28	BRD-K62959606	sphingosine	Ceramidase inhibitor
778	15.28	BRD-K63265447	docetaxel	Tubulin inhibitor
779	15.25	BRD-K65417056	meprylcaine	Local anesthetic
780	15.21	BRD-A42167015	carteolol	Adrenergic receptor antagonist
781	15.15	BRD-A97674275	ranolazine	Sodium channel blocker
782	15.14	BRD-K55703048	latrepirdine	Glutamate receptor antagonist
783	15.08	BRD-K51967704	BIIB021	HSP inhibitor
784	14.85	BRD-K93618743	ipriflavone	Bone resorption inhibitor
785	14.84	BRD-K32828673	chelidonine	Tubulin inhibitor
786	14.75	BRD-K79254416	decitabine	DNA methyltransferase inhibitor
787	14.7	BRD-A87848830	bimatoprost	Prostanoid receptor agonist
788	14.68	BRD-A39052811	mosapride	Serotonin receptor agonist
789	14.65	BRD-K85925969	zalcitabine	Nucleoside reverse transcriptase inhibitor
790	14.57	BRD-K93280214	gabazine	GABA receptor antagonist
791	14.49	BRD-K96471533	nitazoxanide	Pyruvate ferredoxin oxidoreductase inhibitor
792	14.45	BRD-A39747742	estradiol-valerate	Estrogen receptor agonist
793	14.39	BRD-K81225797	SCH-58261	Adenosine receptor antagonist
794	14.38	BRD-K62310379	fluticasone	Glucocorticoid receptor agonist
795	14.37	BRD-K54771420	glycocholic-acid	Cholesterol inhibitor
796	14.36	BRD-A01593789	chlormadinone	5-alpha reductase inhibitor
797	14.35	BRD-K89125793	tinidazole	Antiprotozoal
798	14.35	BRD-K76872913	benzanthrone	Aromatic hydrocarbon derivative
799	14.29	BRD-K26674531	GR-235	Estrogen receptor agonist
800	14.21	BRD-M16762496	PIK-75	DNA protein kinase inhibitor
801	14.21	BRD-K63195589	tipifarnib	Farnesyltransferase inhibitor
802	14.2	BRD-K95676198	JAK3-inhibitor-V	JAK inhibitor
803	14.2	BRD-A52588987	SKF-83566	Dopamine receptor antagonist
804	14.15	BRD-K96144918	mead-acid	KPL-1 tumor suppressor
805	14.1	BRD-A34706053	CGP-12177	Adrenergic receptor agonist
806	14.09	BRD-K71003802	hippeastrine	Plant alkaloid
807	14.08	BRD-K08547377	irinotecan	Topoisomerase inhibitor
808	14.07	BRD-A56987319	SQ-22536	Adenylyl cyclase inhibitor
809	14.04	BRD-K74133369	oligomycin-a	ATP synthase inhibitor
810	14.02	BRD-K02404261	caffeine	Adenosine receptor antagonist
811	13.95	BRD-K98493452	honokiol	AKT inhibitor
812	13.88	BRD-A52172093	VU-0413807-2	Calcium channel blocker
813	13.83	BRD-K88568253	iproniazid	Monoamine oxidase inhibitor
814	13.78	BRD-K15935639	z-leu3-VS	Proteasome inhibitor
815	13.77	BRD-K85119730	tolbutamide	ATP channel blocker
816	13.75	BRD-K11636097	JNJ-7706621	CDK inhibitor
817	13.59	BRD-A24191444	ifenprodil	Adrenergic receptor antagonist
818	13.57	BRD-K19525698	ozagrel	Thromboxane synthase inhibitor
819	13.57	BRD-K17008822	BD-1008	Sigma receptor antagonist
820	13.56	BRD-A24381660	zeranol	Estrogen receptor agonist
821	13.54	BRD-K91370081	anisomycin	DNA synthesis inhibitor
822	13.54	BRD-A83695761	chromanol	Potassium channel blocker
823	13.53	BRD-K36965586	m-chlorophenylbiguanide	Serotonin receptor agonist
824	13.43	BRD-A26032986	zaldaride	Calmodulin antagonist
825	13.42	BRD-A78295502	hydroquinine	Antiarrhythmic
826	13.4	BRD-K19227686	phenolphthalein	Indicator dye
827	13.37	BRD-K13800121	parecoxib	Cyclooxygenase inhibitor
828	13.33	BRD-A72758037	asiatic-acid	Apoptosis stimulant
829	13.3	BRD-K14550461	doxercalciferol	Vitamin D receptor agonist
830	13.27	BRD-K23369905	oxiconazole	Bacterial cell wall synthesis inhibitor
831	13.27	BRD-K45479396	BP-554	Serotonin receptor agonist
832	13.24	BRD-K37206356	rhamnetin	HDAC inhibitor
833	13.23	BRD-A98431941	ephedrine	Adrenergic receptor agonist
834	13.22	BRD-A10523515	GSK-429286A	Rho associated kinase inhibitor
835	13.2	BRD-K64614248	salicin	Anti-inflammatory
836	13.13	BRD-A60070924	alpha-estradiol	Estrogen receptor agonist
837	13.11	BRD-K54316499	tolterodine	Acetylcholine receptor antagonist
838	13.09	BRD-A68281735	REV-5901	Leukotriene receptor antagonist
839	13.04	BRD-A42628519	iopanoic-acid	Radiopaque medium
840	13.03	BRD-K67578145	GDC-0879	RAF inhibitor
841	13.02	BRD-K22227508	targinine	Nitric oxide synthase inhibitor
842	13	BRD-K92000912	AM-251	Cannabinoid receptor antagonist
843	12.92	BRD-U97083655	teicoplanin	Bacterial cell wall synthesis inhibitor
844	12.9	BRD-A68723818	brompheniramine	Histamine receptor antagonist
845	12.84	BRD-A93477898	PETCM	Caspase activator
846	12.82	BRD-A09161221	nomilin	HSP inhibitor
847	12.78	BRD-K69195780	NAN-190	Serotonin receptor agonist
848	12.73	BRD-K79090631	CGP-60474	CDK inhibitor
849	12.68	BRD-A42831637	tetrahydrocannabinol-7-oic-acid	Anti-inflammatory
850	12.61	BRD-K67102207	phenylbutyrate	HDAC inhibitor
851	12.53	BRD-K60060639	methyllidocaine	antiarrhythmic medication
852	12.52	BRD-A75368507	demeclocycline	Bacterial 30S ribosomal subunit inhibitor
853	12.51	BRD-K82381502	acetylcholine	Acetylcholine receptor agonist
854	12.5	BRD-K52020312	metronidazole	DNA inhibitor
855	12.45	BRD-A19500257	geldanamycin	HSP inhibitor
856	12.44	BRD-K68507560	dicycloverine	Acetylcholine receptor antagonist
857	12.41	BRD-K20655524	mefexamide	Psychoactive drug
858	12.33	BRD-A88774919	doxycycline	Bacterial 30S ribosomal subunit inhibitor
859	12.3	BRD-K90976994	dehydrocholic-acid	Bile acid
860	12.29	BRD-K31792052	pifithrin	Interleukin receptor antagonist
861	12.27	BRD-K15262564	mupirocin	Isoleucyl-tRNA synthetase inhibitor
862	12.24	BRD-K15409150	penfluridol	T-type calcium channel blocker
863	12.22	BRD-K06426971	ryuvidine	Histone lysine methyltransferase inhibitor
864	12.19	BRD-K01253243	SB-590885	RAF inhibitor
865	12.19	BRD-K30020243	aliskiren	Antihypertensive
866	12.17	BRD-A48261811	argatroban	Thrombin inhibitor
867	12.1	BRD-K82484965	carmoxirole	Dopamine receptor agonist
868	12.01	BRD-K08556791	ethoprop	Acetylcholinesterase inhibitor
869	12.01	BRD-K73196317	urapidil	Adrenergic receptor antagonist
870	11.99	BRD-A80928489	1-monopalmitin	P-glycoprotein inhibitor
871	11.96	BRD-K59753853	MDL-29951	Glutamate receptor antagonist
872	11.92	BRD-A00993607	alprenolol	Adrenergic receptor antagonist
873	11.87	BRD-K99063460	didanosine	Nucleoside reverse transcriptase inhibitor
874	11.84	BRD-K13169950	NSC-3852	HDAC inhibitor
875	11.82	BRD-K92492521	LY-255283	Leukotriene receptor antagonist
876	11.81	BRD-K34437622	BRD-K34437622	Thymidylate synthase inhibitor
877	11.81	BRD-A62525898	prednisone	Glucocorticoid receptor agonist
878	11.78	BRD-A20697603	thiostrepton	FOXM1 inhibitor
879	11.78	BRD-A87606379	nadolol	Adrenergic receptor antagonist
880	11.74	BRD-K76723084	isotretinoin	Retinoid receptor agonist
881	11.66	BRD-A78391468	prednisolone	Glucocorticoid receptor agonist
882	11.63	BRD-K10466330	AVA	Nucleophosmin inhibitor
883	11.62	BRD-K16195444	oxymetazoline	Adrenergic receptor agonist
884	11.61	BRD-A93236127	digitoxin	ATPase inhibitor
885	11.5	BRD-K92413528	thiazolidinecarboxylic-acid	Reducing agent
886	11.49	BRD-K54759182	dosulepin	Norepinephrine reuptake inhibitor
887	11.47	BRD-K61737877	VEGF-receptor-2-kinase-inhibitor-IV	VEGFR inhibitor
888	11.43	BRD-K45401373	betulinic-acid	Apoptosis stimulant
889	11.43	BRD-A53131506	epitestosterone	Inactive testosterone analog
890	11.38	BRD-K20714604	RS-56812	Serotonin receptor partial agonist
891	11.36	BRD-A03359064	ICI-89406	Adrenergic receptor antagonist
892	11.36	BRD-K06080977	eicosatetraynoic-acid	Cyclooxygenase inhibitor
893	11.34	BRD-K71860425	CDK2-5-inhibitor	CDK inhibitor
894	11.3	BRD-K46211610	tolazoline	Adrenergic receptor antagonist
895	11.27	BRD-A09722536	cyclophosphamide	DNA alkylating agent
896	11.26	BRD-A94709349	metaxalone	Muscle relaxant
897	11.25	BRD-K87696786	LY-456236	Glutamate receptor antagonist
898	11.23	BRD-A79465854	auranofin	NFkB pathway inhibitor
899	11.21	BRD-K15601958	SEW-2871	Lysophospholipid receptor agonist
900	11.18	BRD-A51382177	fosinopril	ACE inhibitor
901	11.17	BRD-A30437061	camptothecin	Topoisomerase inhibitor
902	11.13	BRD-K54790157	trioxsalen	DNA synthesis inhibitor
903	11.11	BRD-K56001384	antimycin-a	ATP synthase inhibitor
904	11.06	BRD-A59303141	quinethazone	Thiazide diuretic
905	11.05	BRD-K52620403	STO-609	Calmodulin antagonist
906	11.03	BRD-K94270326	ecopipam	Dopamine receptor antagonist
907	10.99	BRD-A70649075	sulconazole	Sterol demethylase inhibitor
908	10.97	BRD-A94669766	naringenin	Aromatase inhibitor
909	10.95	BRD-K51816706	oxindole-I	VEGFR inhibitor
910	10.94	BRD-K47539947	tetradecylthioacetic-acid	Lipid peroxidase inhibitor
911	10.9	BRD-A73368467	fexofenadine	Histamine receptor antagonist
912	10.87	BRD-U73238814	QL-XI-92	DDR1 inhibitor
913	10.85	BRD-A31007383	SDZ-WAG-994	Adenosine receptor agonist
914	10.83	BRD-K92870997	pterostilbene	Cyclooxygenase inhibitor
915	10.82	BRD-K32501161	vanoxerine	Dopamine uptake inhibitor
916	10.81	BRD-K82823804	SA-792987	PKC inhibitor
917	10.72	BRD-K00675675	CL-82198	Metalloproteinase inhibitor
918	10.72	BRD-A22769835	homochlorcyclizine	Antihistamine
919	10.68	BRD-A40639672	ketorolac	Cyclooxygenase inhibitor
920	10.57	BRD-K81062487	taurocholic-acid	Bile acid
921	10.52	BRD-A76093993	cromakalim	Potassium channel activator
922	10.46	BRD-A09472452	flecainide	Sodium channel blocker
923	10.44	BRD-K26664453	cytochalasin-b	Microtubule inhibitor
924	10.43	BRD-A68929948	DAPT-GSI-IX	Gamma secretase inhibitor
925	10.41	BRD-A46179541	doxapram	Potassium channel blocker
926	10.31	BRD-K96037667	norethindrone	Progesterone receptor agonist
927	10.3	BRD-K45068323	W-13	Calmodulin antagonist
928	10.26	BRD-K02953697	naringin	Cytochrome P450 inhibitor
929	10.14	BRD-K26548821	quinpirole	Dopamine receptor agonist
930	10.13	BRD-K45988865	tetramethylsilane	Internal standard for NMR spectroscopy
931	10.06	BRD-K96778649	tyrphostin-47	EGFR inhibitor
932	9.97	BRD-A65282128	cefazolin	Bacterial cell wall synthesis inhibitor
933	9.96	BRD-K04111260	raclopride	Dopamine receptor antagonist
934	9.96	BRD-K93080877	Ala-Ala-Phe-CMK	Tripeptidyl peptidase inhibitor
935	9.88	BRD-K78485176	olmesartan	Angiotensin receptor antagonist
936	9.8	BRD-A62025033	temsirolimus	MTOR inhibitor
937	9.79	BRD-K78294846	osthol	Calcium channel blocker
938	9.75	BRD-K60184833	tyrphostin-46	Tyrosine kinase inhibitor
939	9.73	BRD-K02123250	JNJ-38877605	Tyrosine kinase inhibitor
940	9.72	BRD-A66563878	medetomidine	Adrenergic receptor agonist
941	9.71	BRD-K10974103	diloxanide	Protein synthesis inhibitor
942	9.69	BRD-K47278471	diphenhydramine	Histamine receptor antagonist
943	9.64	BRD-K90864987	cobalt(II)-chloride	HSP inducer
944	9.64	BRD-A27489425	rolitetracycline	Bacterial 30S ribosomal subunit inhibitor
945	9.61	BRD-A35519318	benidipine	Calcium channel blocker
946	9.6	BRD-K51541829	RO-25-6981	Ionotropic glutamate receptor antagonist
947	9.57	BRD-A16332958	modafinil	Adrenergic receptor agonist
948	9.57	BRD-K25311561	KU-55933	ATM kinase inhibitor
949	9.56	BRD-K75089421	procainamide	Sodium channel blocker
950	9.52	BRD-K90027355	spironolactone	Mineralocorticoid receptor antagonist
951	9.5	BRD-A19053259	pseudopelletierine	Anthelmintic
952	9.45	BRD-K40742111	baeomycesic-acid	Lipoxygenase inhibitor
953	9.42	BRD-A02990301	lofexidine	Adrenergic receptor agonist
954	9.41	BRD-K95899059	LY-344864	Serotonin receptor agonist
955	9.39	BRD-K11801786	trimidox	Ribonucleotide reductase inhibitor
956	9.36	BRD-A08709697	heliotrine	Pyrrolizidine alkaloid
957	9.35	BRD-K50128260	sildenafil	Phosphodiesterase inhibitor
958	9.34	BRD-K81916719	triclabendazole	Microtubule inhibitor
959	9.32	BRD-A15131297	benazepril	ACE inhibitor
960	9.25	BRD-K94887716	TFMPP	Serotonin receptor agonist
961	9.19	BRD-K30563334	rifabutin	Protein synthesis inhibitor
962	9.11	BRD-K09537769	NU-7026	DNA dependent protein kinase inhibitor
963	9.1	BRD-K78692225	leflunomide	Dihydroorotate dehydrogenase inhibitor
964	9.09	BRD-K44442813	pidotimod	Interferon receptor agonist
965	9.06	BRD-K19136521	indirubin	CDK inhibitor
966	9.02	BRD-K60230970	MG-132	Proteasome inhibitor
967	9	BRD-K57631554	aminolevulinic-acid	Oxidizing agent
968	8.99	BRD-K69837166	trap-101	Nociceptin/orphanin FQ (NOP) receptor antagonist
969	8.9	BRD-K13087974	4,5-dianilinophthalimide	EGFR inhibitor
970	8.88	BRD-K74112339	acetohydroxamic-acid	Urease inhibitor
971	8.88	BRD-K47150025	KI-8751	VEGFR inhibitor
972	8.84	BRD-K44497846	enalapril	ACE inhibitor
973	8.79	BRD-K09416995	lovastatin	HMGCR inhibitor
974	8.67	BRD-K49404994	levetiracetam	Calcium channel blocker
975	8.63	BRD-K38305202	domperidone	Dopamine receptor antagonist
976	8.63	BRD-K28183345	proguanil	Dihydrofolate reductase inhibitor
977	8.61	BRD-K85030058	benactyzine	Acetylcholine receptor antagonist
978	8.6	BRD-A75455249	kavain	Calcium channel modulator
979	8.53	BRD-K75295174	alisertib	Aurora kinase inhibitor
980	8.53	BRD-K04170657	psoromic-acid	Ras GTPase inhibitor
981	8.52	BRD-K31611373	fluprostenol	Prostanoid receptor agonist
982	8.5	BRD-A22713669	BVT-948	Tyrosine phosphatase inhibitor
983	8.49	BRD-A01826957	xanthinol	Vasodilator
984	8.46	BRD-K10961822	latanoprost	Prostanoid receptor agonist
985	8.45	BRD-K49372556	mofezolac	Cyclooxygenase inhibitor
986	8.44	BRD-A65597028	RX-821002	Adrenergic receptor antagonist
987	8.42	BRD-A03623303	metoprolol	Adrenergic receptor antagonist
988	8.4	BRD-K89687904	PKCbeta-inhibitor	PKC inhibitor
989	8.38	BRD-A79903587	tegafur	Thymidylate synthase inhibitor
990	8.37	BRD-K22385716	LY-303511	Casein kinase inhibitor
991	8.34	BRD-K87142802	veliparib	PARP inhibitor
992	8.32	BRD-K44899736	RO-16-6941	Monoamine oxidase inhibitor
993	8.31	BRD-K64994968	progesterone	Progesterone receptor agonist
994	8.31	BRD-K74763371	bosentan	Endothelin receptor antagonist
995	8.28	BRD-A29734509	disopyramide	Sodium channel blocker
996	8.25	BRD-K33106058	cytarabine	Ribonucleotide reductase inhibitor
997	8.23	BRD-A96456596	FPL-55712	Leukotriene receptor antagonist
998	8.23	BRD-K06543683	bisindolylmaleimide-ix	CDK inhibitor
999	8.22	BRD-K28667793	pyrazinamide	Fatty acid synthase inhibitor
1000	8.15	BRD-A23683907	NAS-181	Serotonin receptor antagonist
1001	8.13	BRD-K87919739	tyrphostin-AG-825	Receptor tyrosine protein kinase inhibitor
1002	8.11	BRD-A78877355	nefopam	Cyclooxygenase inhibitor
1003	8.1	BRD-K28578425	cilostamide	Phosphodiesterase inhibitor
1004	8.1	BRD-K88849294	lobaric-acid	Tyrosine phosphatase inhibitor
1005	8.07	BRD-K36864847	BD-1047	Adrenergic receptor antagonist
1006	8.03	BRD-K01612348	meropenem	Bacterial cell wall synthesis inhibitor
1007	7.99	BRD-K06712146	YM-90709	IL5 inhibitor
1008	7.95	BRD-A36066264	estradiol-benzoate	Estrogen receptor agonist
1009	7.94	BRD-K45330754	diethylstilbestrol	Estrogen receptor agonist
1010	7.89	BRD-K48115423	2-(4-methoxybenzylthio)-6-methylpyrimidin-4-ol	Matrix metalloprotease inhibitor
1011	7.89	BRD-A97437073	rosiglitazone	Insulin sensitizer
1012	7.88	BRD-K28115081	apafant	Platelet activating factor receptor antagonist
1013	7.76	BRD-K97810537	beclometasone	Glucocorticoid receptor agonist
1014	7.75	BRD-K26134695	calpeptin	Calpain inhibitor
1015	7.75	BRD-K08890269	CO-102862	Sodium channel blocker
1016	7.65	BRD-K47761761	PD-168077	Dopamine receptor agonist
1017	7.65	BRD-K12357156	AG-490	EGFR inhibitor
1018	7.65	BRD-K82562631	tolmetin	Cyclooxygenase inhibitor
1019	7.61	BRD-A25143711	hydrocortisone	Glucocorticoid receptor agonist
1020	7.56	BRD-A54596827	solifenacin	Acetylcholine receptor antagonist
1021	7.55	BRD-K09963420	saquinavir	HIV protease inhibitor
1022	7.54	BRD-K72541103	JAK3-inhibitor-I	JAK inhibitor
1023	7.52	BRD-K68264559	brimonidine	Adrenergic receptor agonist
1024	7.51	BRD-K43290182	Ro-04-6790	Serotonin receptor antagonist
1025	7.48	BRD-A44780397	mifepristone	Glucocorticoid receptor antagonist
1026	7.42	BRD-K88677950	PD-198306	MAP kinase inhibitor
1027	7.41	BRD-K45117373	Y-26763	Potassium channel activator
1028	7.31	BRD-K14693417	cinchonine	P-glycoprotein inhibitor
1029	7.3	BRD-A93659613	GR-89696	Opioid receptor agonist
1030	7.23	BRD-K18909381	CGS-12066B	Serotonin receptor agonist
1031	7.2	BRD-K44779798	miglitol	Glucosidase inhibitor
1032	7.19	BRD-K41564320	purvalanol-b	Tyrosine kinase inhibitor
1033	7.18	BRD-A42571354	cetirizine	Histamine receptor antagonist
1034	7.09	BRD-K91290917	amodiaquine	Histamine receptor agonist
1035	7.04	BRD-K76810206	nicergoline	Adrenergic receptor antagonist
1036	7.03	BRD-K63430059	methoxsalen	DNA synthesis inhibitor
1037	7.01	BRD-A34806832	proscillaridin	ATPase inhibitor
1038	7.01	BRD-K56429665	calcipotriol	Vitamin D receptor agonist
1039	6.99	BRD-K43149758	myricetin	Androgen receptor agonist
1040	6.97	BRD-K35559145	levomepromazine	Dopamine receptor antagonist
1041	6.94	BRD-K32526544	DCEBIO	Potassium channel activator
1042	6.94	BRD-K05977355	fluconazole	Sterol demethylase inhibitor
1043	6.91	BRD-K14221570	benzopurpurin-4b	HIV entry inhibitor
1044	6.9	BRD-A96107863	nisoldipine	Calcium channel blocker
1045	6.9	BRD-K96809896	SKF-86002	p38 MAPK inhibitor
1046	6.86	BRD-K31054881	BMY-7378	Adrenergic receptor antagonist
1047	6.84	BRD-A41941932	vitexin	Antioxidant
1048	6.78	BRD-K94920105	DR-2313	PARP inhibitor
1049	6.74	BRD-A39172021	ampiroxicam	Cyclooxygenase inhibitor
1050	6.69	BRD-K08619574	thioproperazine	Dopamine receptor antagonist
1051	6.66	BRD-K13566078	BMS-345541	IKK inhibitor
1052	6.66	BRD-A45664787	iloprost	Platelet aggregation inhibitor
1053	6.65	BRD-K15164005	apoptosis-activator-II	Carboxylesterase inhibitor
1054	6.63	BRD-K87024524	phenelzine	Monoamine oxidase inhibitor
1055	6.63	BRD-K83023055	GR-135531	Melatonin receptor agonist
1056	6.62	BRD-K93880783	stavudine	DNA directed DNA polymerase inhibitor
1057	6.62	BRD-A07440155	labetalol	Adrenergic receptor antagonist
1058	6.59	BRD-K73982490	BI-78D3	JNK inhibitor
1059	6.51	BRD-K51671335	sulpiride	Dopamine receptor antagonist
1060	6.38	BRD-A74500471	ethambutol	Bacterial cell wall synthesis inhibitor
1061	6.36	BRD-K66615216	moxifloxacin	Bacterial DNA gyrase inhibitor
1062	6.32	BRD-K93658967	aloisine	CDK inhibitor
1063	6.25	BRD-K28029915	dolasetron	Serotonin receptor antagonist
1064	6.21	BRD-A24429032	HEAT	Adrenergic receptor antagonist
1065	6.2	BRD-K71534238	GW-9508	Free fatty acid receptor agonist
1066	6.15	BRD-K44876623	zolpidem	Benzodiazepine receptor agonist
1067	6.15	BRD-K47328134	lysylphenylalanyl-tyrosine	Heparin activation inhibitor
1068	6.13	BRD-A56012032	thiorphan	Membrane metalloendopeptidase inhibitor
1069	6.06	BRD-K10843433	phenylbutazone	Cyclooxygenase inhibitor
1070	6.02	BRD-K53878242	MMPX	Phosphodiesterase inhibitor
1071	6	BRD-A71203467	l-stepholidine	Dopamine receptor antagonist
1072	5.99	BRD-K48932581	cetraxate	Mucus protecting agent
1073	5.94	BRD-K09132007	D-4476	TGF beta receptor inhibitor
1074	5.94	BRD-K86600316	RS-79948	Adrenergic receptor antagonist
1075	5.88	BRD-K61323504	SB-225002	CC chemokine receptor antagonist
1076	5.88	BRD-K59256312	gabexate	Serine protease inhibitor
1077	5.85	BRD-K24681473	YM-155	Survivin inhibitor
1078	5.85	BRD-K25394294	oxaprozin	Cyclooxygenase inhibitor
1079	5.81	BRD-K66093087	FGIN-1-43	Benzodiazepine receptor agonist
1080	5.79	BRD-K39915878	loxapine	Dopamine receptor antagonist
1081	5.79	BRD-K97158071	droperidol	Dopamine receptor antagonist
1082	5.79	BRD-A46393198	tetramisole	Immunostimulant
1083	5.78	BRD-K38197229	bumetanide	Solute carrier family member inhibitor
1084	5.77	BRD-A37347161	BRL-52537	Opioid receptor agonist
1085	5.73	BRD-K50388907	fenofibrate	PPAR receptor agonist
1086	5.7	BRD-K67100011	pivmecillinam	Bacterial cell wall synthesis inhibitor
1087	5.69	BRD-A13084692	troglitazone	Insulin sensitizer
1088	5.66	BRD-K46441700	GR-55562	Serotonin receptor antagonist
1089	5.65	BRD-K25875056	SC-9	Protein tyrosine kinase activator
1090	5.59	BRD-A14966924	alaproclate	Serotonin receptor antagonist
1091	5.58	BRD-K99174507	cardiogenol-c	Cardiomyogenesis inducer
1092	5.55	BRD-K20920669	cromoglicic-acid	Immunosuppressant
1093	5.54	BRD-A07824748	flavanone	11-beta-HSD1 inhibitor
1094	5.48	BRD-K48692744	NU-1025	PARP inhibitor
1095	5.47	BRD-K07220430	cinnarizine	Calcium channel blocker
1096	5.46	BRD-K09764130	mead-ethanolamide	Cannabinoid receptor agonist
1097	5.42	BRD-K34820100	tebuthiuron	Photosynthesis inhibitor
1098	5.36	BRD-A66435872	HTMT	Histamine receptor agonist
1099	5.32	BRD-A83237092	fulvestrant	Estrogen receptor antagonist
1100	5.32	BRD-K17497770	butein	EGFR inhibitor
1101	5.32	BRD-K37447567	hydrocotarnine	Opioid receptor antagonist
1102	5.27	BRD-A10903566	imiloxan	Adrenergic receptor antagonist
1103	5.16	BRD-K21667562	AM-404	Cyclooxygenase inhibitor
1104	5.15	BRD-K81521265	dicyclohexylurea	Epoxide hydolase inhibitor
1105	5.13	BRD-A09056319	alfuzosin	Adrenergic receptor antagonist
1106	5.07	BRD-K82823076	RO-15-4513	GABA benzodiazepine site receptor inverse agonist
1107	5.04	BRD-A94543220	bifonazole	Sterol demethylase inhibitor
1108	4.92	BRD-K31542390	mycophenolic-acid	Dehydrogenase inhibitor
1109	4.91	BRD-K12513978	fenbufen	Cyclooxygenase inhibitor
1110	4.9	BRD-A50928468	norgestrel	Progesterone receptor agonist
1111	4.89	BRD-A41301928	bongkrek-acid	Mitochondrial ADP, ATP translocase inhibitor
1112	4.88	BRD-K18194590	mephentermine	Adrenergic receptor agonist
1113	4.86	BRD-K92015269	GBR-12783	Dopamine uptake inhibitor
1114	4.8	BRD-K45861246	azaperone	Dopamine receptor antagonist
1115	4.79	BRD-K49519092	immethridine	Histamine receptor agonist
1116	4.78	BRD-A91866971	SQ-29548	Thromboxane receptor antagonist
1117	4.76	BRD-K59332007	linopirdine	Potassium channel blocker
1118	4.76	BRD-K27721098	clopidogrel	Purinergic receptor antagonist
1119	4.74	BRD-A73859745	glycodeoxycholic-acid	Apoptosis stimulant
1120	4.65	BRD-K91243525	SR-142948	Neurotensin receptor antagonist
1121	4.62	BRD-K72222507	quinapril	ACE inhibitor
1122	4.62	BRD-K49049886	CGS-15943	Adenosine receptor antagonist
1123	4.58	BRD-K57222227	indometacin	Cyclooxygenase inhibitor
1124	4.55	BRD-A81866333	CGS-21680	Adenosine receptor agonist
1125	4.55	BRD-K02867583	minaprine	Serotonin reuptake inhibitor
1126	4.53	BRD-K41713976	E-4031	Potassium channel blocker
1127	4.51	BRD-A62021152	WAY-161503	Serotonin receptor agonist
1128	4.48	BRD-K51318897	fenbendazole	Tubulin inhibitor
1129	4.47	BRD-A75935363	atracurium	Acetylcholine receptor antagonist
1130	4.44	BRD-K18518344	digitoxigenin	ATPase inhibitor
1131	4.4	BRD-K76534306	enrofloxacin	Bacterial DNA gyrase inhibitor
1132	4.4	BRD-K96084870	DMBI	PDGFR receptor inhibitor
1133	4.4	BRD-K11742128	triprolidine	Histamine receptor antagonist
1134	4.39	BRD-K74501079	azithromycin	Bacterial 50S ribosomal subunit inhibitor
1135	4.38	BRD-A32349859	methyl-angolensate	Apoptosis inhibitor
1136	4.37	BRD-K88551539	CAY-10585	HIF modulator
1137	4.36	BRD-K21283037	riluzole	Glutamate inhibitor
1138	4.32	BRD-K52394958	GR-159897	Tachykinin antagonist
1139	4.3	BRD-K95202259	ML-3163	p38 MAPK inhibitor
1140	4.3	BRD-K10098805	rhapontin	Apoptosis stimulant
1141	4.23	BRD-K76617868	fasudil	Rho associated kinase inhibitor
1142	4.21	BRD-K62858456	lomerizine	Calcium channel blocker
1143	4.19	BRD-K41170226	deoxycholic-acid	G protein-coupled receptor agonist
1144	4.19	BRD-K68191783	ALW-II-38-3	Ephrin inhibitor
1145	4.14	BRD-K62056274	quipazine	Serotonin receptor agonist
1146	4.12	BRD-A79981887	midodrine	Adrenergic receptor agonist
1147	4.09	BRD-K96670504	lonidamine	Glucokinase inhibitor
1148	4.02	BRD-K68867920	quetiapine	Dopamine receptor antagonist
1149	4.02	BRD-K77641333	naphazoline	Adrenergic receptor agonist
1150	3.98	BRD-K09471561	levofloxacin	Bacterial DNA gyrase inhibitor
1151	3.96	BRD-A54927599	KF-38789	P-selectin inhibitor
1152	3.95	BRD-K87049188	fusaric-acid	Dopamine beta hydroxylase inhibitor
1153	3.95	BRD-A23072235	pheniramine	Histamine receptor antagonist
1154	3.91	BRD-K04710043	hexamethylenebisacetamide	AKT inhibitor
1155	3.91	BRD-K48367671	febuxostat	Xanthine oxidase inhibitor
1156	3.88	BRD-K15616905	CCCP	Mitochondrial oxidative phosphorylation uncoupler
1157	3.84	BRD-K53913732	SB-408124	Orexin receptor antagonist
1158	3.83	BRD-M40783228	mesna	Antioxidant
1159	3.81	BRD-K36616567	doxepin	Histamine receptor antagonist
1160	3.79	BRD-K52989797	clomipramine	Serotonin transporter inhibitor (SERT)
1161	3.76	BRD-K35723520	darinaparsin	Apoptosis stimulant
1162	3.74	BRD-A99571536	dubinidine	Anti-epileptic
1163	3.72	BRD-K76908866	CP-724714	EGFR inhibitor
1164	3.63	BRD-K63606607	bufalin	ATPase inhibitor
1165	3.58	BRD-A78942461	ICI-118551	Adrenergic receptor antagonist
1166	3.49	BRD-A51714012	venlafaxine	Adrenergic inhibitor
1167	3.45	BRD-K59522102	piperine	Monoamine oxidase inhibitor
1168	3.43	BRD-K97764662	PD-173074	FGFR inhibitor
1169	3.42	BRD-K88611939	aniracetam	Glutamate receptor agonist
1170	3.38	BRD-K56343971	vemurafenib	RAF inhibitor
1171	3.38	BRD-K13571841	pepstatin	Aspartic protease inhibitor
1172	3.38	BRD-K00234327	RU-24969	Serotonin receptor agonist
1173	3.35	BRD-A30205217	ethotoin	Hydantoin antiepileptic
1174	3.3	BRD-A63998256	helveticoside	ATPase inhibitor
1175	3.23	BRD-K54987996	CAY-10578	Casein kinase inhibitor
1176	3.22	BRD-K40782193	QX-222	Sodium channel blocker
1177	3.21	BRD-K65146499	nabumetone	Cyclooxygenase inhibitor
1178	3.17	BRD-A74904029	EI-231	Casein kinase inhibitor
1179	3.15	BRD-K74236984	UNC-0321	Histone lysine methyltransferase inhibitor
1180	3.14	BRD-K62374253	rufloxacin	Bacterial DNA gyrase inhibitor
1181	3.14	BRD-A64933752	CV-1808	Adenosine receptor agonist
1182	3.14	BRD-K81272440	dantrolene	Calcium channel blocker
1183	3.12	BRD-K83302049	protopine	Histamine receptor antagonist
1184	3.09	BRD-K47717570	NBQX	Glutamate receptor antagonist
1185	3.07	BRD-K02265150	amoxapine	Norepinephrine reuptake inhibitor
1186	3.05	BRD-K84663978	trequinsin	Phosphodiesterase inhibitor
1187	3.03	BRD-A82238138	budesonide	Glucocorticoid receptor agonist
1188	3.02	BRD-A82096673	KU-C103428N	CDC inhibitor
1189	3	BRD-A50684349	fenoldopam	Dopamine receptor agonist
1190	2.96	BRD-K88625236	nonoxynol-9	Membrane integrity inhibitor
1191	2.92	BRD-K64857848	XMD-885	Leucine rich repeat kinase inhibitor
1192	2.92	BRD-A64092382	mexiletine	Sodium channel blocker
1193	2.89	BRD-K07881437	danusertib	Aurora kinase inhibitor
1194	2.87	BRD-A54880345	etomidate	GABA receptor modulator
1195	2.85	BRD-A10715913	sulpiride	Dopamine receptor antagonist
1196	2.85	BRD-K79131256	albendazole	Anthelmintic
1197	2.84	BRD-K80672993	M2-PK-activator	-666
1198	2.82	BRD-K61097567	SB-218795	Tachykinin antagonist
1199	2.82	BRD-K36258877	AZ-10417808	Caspase inhibitor
1200	2.78	BRD-K52459643	prostaglandin-e1	Prostanoid receptor agonist
1201	2.76	BRD-K85985071	ellipticine	Topoisomerase inhibitor
1202	2.75	BRD-K06753942	nobiletin	MEK inhibitor
1203	2.73	BRD-A17535965	gelsemine	Acetylcholine receptor antagonist
1204	2.71	BRD-K73290745	ICI-199441	Opioid receptor agonist
1205	2.63	BRD-K66206289	lobeline	Acetylcholine receptor antagonist
1206	2.61	BRD-K89055274	alverine	Muscle relaxant
1207	2.61	BRD-K67261995	adipiodone	Contrast agent
1208	2.6	BRD-A98299281	velnacrine	cholinesterase inhibitor
1209	2.59	BRD-K46212057	voriconazole	Cytochrome P450 inhibitor
1210	2.5	BRD-K64670467	JNJ-16259685	Glutamate receptor antagonist
1211	2.5	BRD-K04185004	oxybuprocaine	Local anesthetic
1212	2.4	BRD-K05396879	15-delta-prostaglandin-j2	PPAR receptor agonist
1213	2.36	BRD-K18574842	nafcillin	Bacterial cell wall synthesis inhibitor
1214	2.33	BRD-K37814297	acepromazine	Dopamine receptor antagonist
1215	2.33	BRD-K15834839	lobendazole	Anthelmintic
1216	2.29	BRD-K99291625	SB-203580	p38 MAPK inhibitor
1217	2.29	BRD-K24526313	levcromakalim	Potassium channel activator
1218	2.29	BRD-A45333398	periplocymarin	Apoptosis stimulant
1219	2.28	BRD-K50324045	avrainvillamide-analog-6	nucleophosmin inhibitor
1220	2.26	BRD-K12260308	xanthoxyline	Antifungal
1221	2.22	BRD-K49668410	clarithromycin	Bacterial 50S ribosomal subunit inhibitor
1222	2.22	BRD-K32906660	bis-tyrphostin	EGFR inhibitor
1223	2.22	BRD-K48869804	icilin	TRPV agonist
1224	2.19	BRD-K76064317	tyrphostin-AG-1296	FLT3 inhibitor
1225	2.18	BRD-K25224017	pirenperone	Serotonin receptor antagonist
1226	2.18	BRD-A83855350	naltrexone	Opioid receptor antagonist
1227	2.15	BRD-K15868788	SDZ-205-557	Serotonin receptor antagonist
1228	2.15	BRD-K77771411	moxonidine	Imidazoline receptor agonist
1229	2.15	BRD-K92758126	gibberellic-acid	NFkB pathway inhibitor
1230	2.11	BRD-K19309090	SR-95639A	Acetylcholine receptor agonist
1231	2.08	BRD-A11135865	nor-binaltorphimine	Opioid receptor antagonist
1232	2.08	BRD-K64052750	gefitinib	EGFR inhibitor
1233	2.07	BRD-A16694057	bisphenol-a	PPAR receptor antagonist
1234	2.06	BRD-K00206590	P-1075	ATP channel activator
1235	2.06	BRD-K93441486	diphemanil	Acetylcholine receptor antagonist
1236	2.01	BRD-K54416256	methimazole	Antithyroid
1237	2.01	BRD-K14765469	vesamicol	Acetylcholinesterase inhibitor
1238	2.01	BRD-K68190965	GR-46611	Serotonin receptor agonist
1239	2.01	BRD-K55424922	anpirtoline	Serotonin receptor agonist
1240	2.01	BRD-A99833829	bethanechol	Acetylcholine receptor agonist
1241	1.98	BRD-K27305650	LY-294002	MTOR inhibitor
1242	1.95	BRD-K16551401	PNU-22394	Serotonin receptor agonist
1243	1.94	BRD-K45158365	valsartan	Angiotensin receptor antagonist
1244	1.94	BRD-A22707317	SB-205384	GABA receptor modulator
1245	1.94	BRD-K56596464	QX-314	Sodium channel blocker
1246	1.94	BRD-K21733600	rofecoxib	Cyclooxygenase inhibitor
1247	1.93	BRD-A96882008	L-732138	Tachykinin antagonist
1248	1.9	BRD-A84327315	calcitriol	Vitamin D receptor agonist
1249	1.9	BRD-A98378129	talniflumate	Cyclooxygenase inhibitor
1250	1.87	BRD-A26334849	propafenone	Antiarrhythmic
1251	1.87	BRD-A81233518	glycopyrrolate	Acetylcholine receptor antagonist
1252	1.86	BRD-A34817987	itraconazole	Cytochrome P450 inhibitor
1253	1.83	BRD-K89348303	ramipril	ACE inhibitor
1254	1.82	BRD-A73605923	mocimycin	Protein synthesis inhibitor
1255	1.8	BRD-A59174698	ritodrine	Adrenergic receptor agonist
1256	1.8	BRD-K21853356	RG-14620	EGFR inhibitor
1257	1.8	BRD-K05464208	JX-401	p38 MAPK inhibitor
1258	1.8	BRD-K18059238	gamma-linolenic-acid	Cyclooxygenase inhibitor
1259	1.8	BRD-A02180903	betamethasone	Glucocorticoid receptor agonist
1260	1.77	BRD-K79116891	proxymetacaine	Sodium channel blocker
1261	1.73	BRD-K93332168	isocarboxazid	Monoamine oxidase inhibitor
1262	1.73	BRD-K79425933	benperidol	Dopamine receptor antagonist
1263	1.71	BRD-K44067360	flufenamic-acid	Chloride channel blocker
1264	1.69	BRD-A95096829	PNU-96415E	Dopamine receptor antagonist
1265	1.69	BRD-A28318179	aminomethyltransferase	Nitric oxide synthase inhibitor
1266	1.69	BRD-K72093121	vidarabine	Antiviral
1267	1.66	BRD-A58157837	butabindide	Tripeptidyl peptidase inhibitor
1268	1.66	BRD-A54845972	dihydroergotamine	Serotonin receptor agonist
1269	1.66	BRD-K70327191	benzoxiquine	Anti-infective
1270	1.62	BRD-K61177364	NBI-27914	CRF receptor antagonist
1271	1.59	BRD-K15086322	JNJ-10191584	Histamine receptor antagonist
1272	1.59	BRD-K83508485	FK-888	Tachykinin antagonist
1273	1.59	BRD-K98530306	clonidine	Adrenergic receptor agonist
1274	1.55	BRD-K98157055	SIB-1757	Glutamate receptor antagonist
1275	1.55	BRD-K01663662	diphenidol	Acetylcholine receptor agonist
1276	1.52	BRD-K32398298	alprazolam	Benzodiazepine receptor agonist
1277	1.52	BRD-K82164249	andarine	Androgen receptor modulator
1278	1.52	BRD-K41567364	SB-334867	Orexin receptor antagonist
1279	1.52	BRD-A49370193	RO-60-0175	Serotonin receptor agonist
1280	1.52	BRD-K18799075	BAY-59-3074	Cannabinoid receptor partial agonist
1281	1.52	BRD-K22031190	diflunisal	Prostanoid receptor antagonist
1282	1.52	BRD-K93034159	cladribine	Adenosine deaminase inhibitor
1283	1.48	BRD-K02590140	O-2050	Cannabinoid receptor antagonist
1284	1.48	BRD-A49734948	foliosidine	Plant alkaloid
1285	1.48	BRD-K14821540	FCCP	Mitochondrial oxidative phosphorylation uncoupler
1286	1.48	BRD-K06854232	AM-580	Retinoid receptor agonist
1287	1.48	BRD-K13032584	procarbazine	Monoamine oxidase inhibitor
1288	1.44	BRD-K18316707	O-1918	Cannabinoid receptor antagonist
1289	1.44	BRD-K91623615	ABT-751	Tubulin inhibitor
1290	1.41	BRD-K97118047	4,5,6,7-tetrabromobenzotriazole	Casein kinase inhibitor
1291	1.38	BRD-K15933101	ropinirole	Dopamine receptor agonist
1292	1.37	BRD-K99498722	NPI-2358	Tubulin inhibitor
1293	1.37	BRD-K25741894	skimmianine	Acetylcholinesterase inhibitor
1294	1.37	BRD-K10177585	PSB-11	Adenosine receptor antagonist
1295	1.37	BRD-A44008656	doxylamine	Histamine receptor antagonist
1296	1.34	BRD-K62996583	lidoflazine	Calcium channel blocker
1297	1.3	BRD-K08996725	zolantidine	Histamine receptor antagonist
1298	1.3	BRD-A19661776	mianserin	Serotonin receptor antagonist
1299	1.3	BRD-A96485169	EBPC	Aldose reductase inhibitor
1300	1.3	BRD-K32292990	CGP-53353	EGFR inhibitor
1301	1.3	BRD-K94512704	spiramide	Dopamine receptor antagonist
1302	1.29	BRD-K04466929	Merck60	HDAC inhibitor
1303	1.27	BRD-K99749624	linifanib	PDGFR receptor inhibitor
1304	1.27	BRD-K00610438	altanserin	Serotonin receptor antagonist
1305	1.27	BRD-A95869247	indapamide	Thiazide diuretic
1306	1.23	BRD-A06726973	dibutyrylcyclic-gmp	cGMP analog
1307	1.23	BRD-A77291778	cyclopentolate	Acetylcholine receptor antagonist
1308	1.21	BRD-A71657825	2-(biphenyl-4-ylsulfonamido)pentanedioic-acid	Matrix metalloprotease inhibitor
1309	1.2	BRD-K97181089	amiloride	Sodium channel blocker
1310	1.2	BRD-K68558722	deracoxib	Cyclooxygenase inhibitor
1311	1.16	BRD-K83637872	SANT-1	Smoothened receptor antagonist
1312	1.16	BRD-A18202423	CPCCOEt	Glutamate receptor antagonist
1313	1.16	BRD-K47983010	BX-795	IKK inhibitor
1314	1.13	BRD-K50398167	meclofenamic-acid	Cyclooxygenase inhibitor
1315	1.11	BRD-K68103045	CGS-20625	Benzodiazepine receptor agonist
1316	1.09	BRD-K81709173	halcinonide	Glucocorticoid receptor agonist
1317	1.07	BRD-K29178788	dictamnine	Furoquinoline alkaloid
1318	1.06	BRD-K52721684	PCO-400	Potassium channel activator
1319	1.06	BRD-K46766488	S-14506	Serotonin receptor agonist
1320	1.02	BRD-K26015241	ODQ	Guanylyl cyclase inhibitor
1321	1.02	BRD-A68930007	ouabain	ATPase inhibitor
1322	1.01	BRD-K61314889	IWR-1-ENDO	PARP inhibitor
1323	0.99	BRD-K71430621	clobenpropit	Histamine receptor antagonist
1324	0.99	BRD-K81876028	CP-93129	Serotonin receptor agonist
1325	0.99	BRD-A58048407	nimodipine	Calcium channel blocker
1326	0.97	BRD-A19736161	ondansetron	Serotonin receptor antagonist
1327	0.95	BRD-K68341547	W-9	Calmodulin antagonist
1328	0.95	BRD-K95739795	tetrabenazine	Vesicular monoamine transporter inhibitor
1329	0.95	BRD-K56115039	BU-226	Imidazoline receptor ligand
1330	0.92	BRD-K69328504	L-690488	Inositol monophosphatase inhibitor
1331	0.88	BRD-A31801025	formestane	Aromatase inhibitor
1332	0.88	BRD-A25234499	aminoglutethimide	Glucocorticoid receptor antagonist
1333	0.87	BRD-A31521121	methocarbamol	Muscle relaxant
1334	0.85	BRD-A60294240	tribenoside	Anti-inflammatory
1335	0.85	BRD-K33818169	GW-3965	LXR agonist
1336	0.85	BRD-K53857191	risperidone	Dopamine receptor antagonist
1337	0.85	BRD-K49111258	prazosin	Adrenergic receptor antagonist
1338	0.81	BRD-K11717138	benzbromarone	Chloride channel blocker
1339	0.81	BRD-K76775527	nimesulide	Cyclooxygenase inhibitor
1340	0.81	BRD-K29673530	hypericin	Tyrosine kinase inhibitor
1341	0.78	BRD-K35483542	alitretinoin	Retinoid receptor agonist
1342	0.78	BRD-K36009368	NNC-63-0532	Opioid receptor agonist
1343	0.78	BRD-K80639402	SB-258585	Serotonin receptor antagonist
1344	0.78	BRD-K29458283	chlorambucil	DNA inhibitor
1345	0.74	BRD-A81402010	KU-C103443N	CDC inhibitor
1346	0.74	BRD-K76568384	PHTPP	Estrogen receptor antagonist
1347	0.74	BRD-A94756469	digoxin	ATPase inhibitor
1348	0.7	BRD-K67298865	SB-431542	TGF beta receptor inhibitor
1349	0.7	BRD-K01095011	finasteride	5-alpha reductase inhibitor
1350	0.7	BRD-K06467078	corynanthine	Adrenergic receptor antagonist
1351	0.67	BRD-K32696739	noreleagnine	Monoamine oxidase inhibitor
1352	0.67	BRD-K39339537	epirizole	Cyclooxygenase inhibitor
1353	0.67	BRD-A37492983	iocetamic-acid	Radiopaque medium
1354	0.67	BRD-K47639036	flavoxate	Acetylcholine receptor antagonist
1355	0.67	BRD-A25004090	erastin	Ion channel antagonist
1356	0.63	BRD-K16508793	diazepam	Benzodiazepine receptor agonist
1357	0.6	BRD-K90789829	nefazodone	Adrenergic inhibitor
1358	0.6	BRD-K37865504	LY-2183240	FAAH inhibitor
1359	0.56	BRD-K96799727	pifithrin-mu	HSP inhibitor
1360	0.56	BRD-A09467419	mebeverine	Acetylcholine receptor antagonist
1361	0.56	BRD-K12994359	valdecoxib	Cyclooxygenase inhibitor
1362	0.53	BRD-K88759641	EMD-66684	Angiotensin receptor antagonist
1363	0.49	BRD-K11163873	phenanthridone	PARP inhibitor
1364	0.49	BRD-K69600043	thiethylperazine	Dopamine receptor antagonist
1365	0.46	BRD-K77987382	mebendazole	Tubulin inhibitor
1366	0.42	BRD-K05350981	oligomycin-c	ATPase inhibitor
1367	0.4	BRD-A80213327	NSC-23766	Ras GTPase inhibitor
1368	0.39	BRD-K81839095	estrone	Estrogen receptor agonist
1369	0.39	BRD-A80793822	pemoline	Dopamine receptor agonist
1370	0.35	BRD-K38436528	imipramine	Norepinephrine reuptake inhibitor
1371	0.28	BRD-K08417745	SID-26681509	Cathepsin inhibitor
1372	0.28	BRD-K30480208	torasemide	Electrolyte reabsorption inhibitor
1373	0.25	BRD-K99595596	salsolinol	Monoamine oxidase inhibitor
1374	0.25	BRD-K29313308	HDAC3-selective	HDAC inhibitor
1375	0.24	BRD-K02113016	olaparib	PARP inhibitor
1376	0.18	BRD-K44094599	tacrolimus	Calcineurin inhibitor
1377	0.14	BRD-K78633253	EXO-1	ARF inhibitor
1378	0.04	BRD-K70358946	aripiprazole	Serotonin receptor agonist
1379	0.03	BRD-A93206962	L-755507	Adrenergic receptor agonist
1380	0.03	BRD-A91008255	bepridil	Calcium channel blocker
1381	0.01	BRD-K68437527	EMF-bca1-60	caspase inhibitor
1382	0	BRD-K97799481	theophylline	Adenosine receptor antagonist
1383	0	BRD-K94070024	depomedrol	Glucocorticoid receptor agonist
1384	0	BRD-K88701661	dimercaptosuccinic-acid	Chelating agent
1385	0	BRD-K63784565	BRD-K63784565	Topoisomerase inhibitor
1386	0	BRD-A80383043	BRD-A80383043	Glutamate receptor agonist
1387	0	BRD-K98684188	GSK-0660	PPAR receptor antagonist
1388	0	BRD-K56064827	EI-273	PKC inhibitor
1389	0	BRD-K80725632	lavendustin-c	EGFR inhibitor
1390	0	BRD-A80960055	celastrol	Anti-inflammatory
1391	0	BRD-A72441487	stiripentol	GABA uptake inhibitor
1392	0	BRD-K90733503	cefalexin	Bacterial cell wall synthesis inhibitor
1393	0	BRD-K63923597	barasertib	Aurora kinase inhibitor
1394	0	BRD-K15402119	huperzine-a	Acetylcholinesterase inhibitor
1395	0	BRD-A15010982	HU-211	Glutamate receptor antagonist
1396	0	BRD-K37798499	etoposide	Topoisomerase inhibitor
1397	0	BRD-K28346421	rifapentine	RNA polymerase inhibitor
1398	0	BRD-A10070317	propranolol	Adrenergic receptor antagonist
1399	0	BRD-K28296557	AKT-inhibitor-IV	AKT inhibitor
1400	0	BRD-K61829047	7b-cis	Exportin antagonist
1401	0	BRD-A80502530	cinobufagin	ATPase inhibitor
1402	0	BRD-K63874012	thioperamide	Histamine receptor antagonist
1403	0	BRD-K25186396	tangeritin	Cell cycle inhibitor
1404	0	BRD-K27665173	D-64406	PDGFR receptor inhibitor
1405	0	BRD-A30590053	MR-16728	Acetylcholine release enhancer
1406	0	BRD-K17796732	JWH-015	Cannabinoid receptor agonist
1407	0	BRD-K60298136	ITE	Aryl hydrocarbon receptor agonist
1408	0	BRD-K06198550	isorotenone	Mitochondrial complex I inhibitor
1409	0	BRD-K02715688	hydrastine	Tyrosine hydroxylase inhibitor
1410	0	BRD-K67860401	AR-A014418	Glycogen synthase kinase inhibitor
1411	0	BRD-K30296925	flavokavain-b	Antineoplastic
1412	0	BRD-A35033682	eriodictyol	Cytochrome P450 inhibitor
1413	0	BRD-K67680372	CI-966	GAT inhibitor
1414	0	BRD-K31912990	CGP-71683	Neuropeptide receptor antagonist
1415	0	BRD-A95513702	androsta-1,4-dien-3,17-dione	Aromatase inhibitor
1416	0	BRD-K14441456	tyrphostin-AG-556	EGFR inhibitor
1417	0	BRD-K17110974	aristolochic-acid	Phospholipase inhibitor
1418	0	BRD-K44084986	Y-27632	Rho associated kinase inhibitor
1419	0	BRD-K14536225	piceid	Glucosidase inhibitor
1420	0	BRD-K39520573	GW-5074	Leucine rich repeat kinase inhibitor
1421	0	BRD-K64755930	etazolate	Phosphodiesterase inhibitor
1422	0	BRD-K32977963	eugenol	Androgen receptor antagonist
1423	0	BRD-K99922388	DPO-1	Potassium channel blocker
1424	0	BRD-K40965114	cyanopindolol	Adrenergic receptor antagonist
1425	0	BRD-K53545112	CNQX	Glutamate receptor antagonist
1426	0	BRD-K17075857	chloroxine	Opioid receptor antagonist
1427	0	BRD-K85133207	HDAC1-selective	HDAC inhibitor
1428	0	BRD-K52313696	tacedinaline	HDAC inhibitor
1429	0	BRD-A74980173	gatifloxacin	Bacterial DNA gyrase inhibitor
1430	0	BRD-A80638690	floxuridine	DNA synthesis inhibitor
1431	0	BRD-K70976396	cefoxitin	Bacterial cell wall synthesis inhibitor
1432	0	BRD-K71289571	zafirlukast	Leukotriene receptor antagonist
1433	0	BRD-K35458079	edaravone	Nootropic agent
1434	0	BRD-K11558771	droxinostat	HDAC inhibitor
1435	0	BRD-A79237180	ascorbic-acid	Antioxidant
1436	0	BRD-K36862742	hydroflumethiazide	Sodium/potassium/chloride transporter inhibitor
1437	0	BRD-K10016611	pyridine-2-aldoxime	Acetylcholinesterase inhibitor
1438	0	BRD-A64479082	quinidine	Sodium channel blocker
1439	0	BRD-A29644307	nomifensine	Dopamine uptake inhibitor
1440	0	BRD-K50387473	XMD-892	MAP kinase inhibitor
1441	0	BRD-K77175907	calcifediol	Vitamin D receptor agonist
1442	0	BRD-K71823332	epothilone-a	Microtubule stabilizing agent
1443	0	BRD-K29733039	deforolimus	MTOR inhibitor
1444	0	BRD-K10573841	tunicamycin	GLCNAC phosphotransferase inhibitor
1445	0	BRD-K48427617	U-0124	MEK inhibitor
1446	0	BRD-K55748775	SCH-28080	ATPase inhibitor
1447	0	BRD-A68039575	liquiritigenin	Aromatase inhibitor
1448	-0.07	BRD-K11129031	gemfibrozil	Lipoprotein lipase activator
1449	-0.11	BRD-K82135108	elesclomol	Oxidative stress inducer
1450	-0.13	BRD-K06926592	tretinoin	Retinoid receptor agonist
1451	-0.14	BRD-A10303790	talampicillin	Bacterial cell wall synthesis inhibitor
1452	-0.18	BRD-A14395271	mesoridazine	Dopamine receptor antagonist
1453	-0.18	BRD-A91452556	estradiol-cypionate	Estrogen receptor agonist
1454	-0.25	BRD-K41731458	triclosan	Enoyl-[acyl-carrier-protein] reductase [NADH] inhibitor
1455	-0.28	BRD-A56892734	esomeprazole	ATPase inhibitor
1456	-0.28	BRD-K71499074	diclofenamide	Carbonic anhydrase inhibitor
1457	-0.28	BRD-A26711594	nicardipine	Calcium channel blocker
1458	-0.28	BRD-A75769826	SDM25N	Opioid receptor antagonist
1459	-0.32	BRD-K09778810	FGIN-1-27	Inositol monophosphatase inhibitor
1460	-0.35	BRD-K20482099	rutin	Antioxidant
1461	-0.39	BRD-K43860855	iobenguane	Antineoplastic
1462	-0.39	BRD-K12539581	nocodazole	Tubulin inhibitor
1463	-0.42	BRD-K66353228	zoxazolamine	Myorelaxant
1464	-0.42	BRD-A93255169	thalidomide	TNF production inhibitor
1465	-0.44	BRD-K97354755	SU-6656	SRC inhibitor
1466	-0.46	BRD-A64977602	mirtazapine	Adrenergic receptor antagonist
1467	-0.46	BRD-K21450440	benzthiazide	Carbonic anhydrase inhibitor
1468	-0.48	BRD-K92778217	mefenamic-acid	Cyclooxygenase inhibitor
1469	-0.49	BRD-K46862739	metyrapone	Cytochrome P450 inhibitor
1470	-0.6	BRD-K84085265	CG-930	JNK inhibitor
1471	-0.6	BRD-A51410489	yohimbine	Adrenergic receptor antagonist
1472	-0.6	BRD-K48735772	PD-158780	EGFR inhibitor
1473	-0.67	BRD-K23335153	AMN-082	Glutamate receptor modulator
1474	-0.7	BRD-K51302260	KU-C103871	GSP agonist
1475	-0.7	BRD-K42452249	EO-1428	p38 MAPK inhibitor
1476	-0.7	BRD-K06221026	DUP-697	Cyclooxygenase inhibitor
1477	-0.74	BRD-K39569857	avrainvillamide-analog-3	nucleophosmin inhibitor
1478	-0.74	BRD-K64451768	GANT-58	GLI antagonist
1479	-0.74	BRD-K46142322	RS-67333	Serotonin receptor partial agonist
1480	-0.74	BRD-K04046242	equilin	Estrogen receptor agonist
1481	-0.78	BRD-A34255068	rolipram	Phosphodiesterase inhibitor
1482	-0.81	BRD-K25079130	avrainvillamide-analog-4	nucleophosmin inhibitor
1483	-0.81	BRD-A39255369	DCPIB	Chloride channel blocker
1484	-0.85	BRD-K55034111	pefloxacin	Bacterial DNA gyrase inhibitor
1485	-0.85	BRD-K45435259	SCH-23390	Dopamine receptor antagonist
1486	-0.85	BRD-A32949107	MRS-1845	Calcium channel blocker
1487	-0.85	BRD-K45542189	diethylcarbamazine	Lipoxygenase inhibitor
1488	-0.85	BRD-K16554956	PTB1	AMPK activator
1489	-0.88	BRD-K13664374	dichloroacetic-acid	Pyruvate dehydrogenase kinase inhibitor
1490	-0.88	BRD-K65814004	diphenyleneiodonium	Nitric oxide synthase inhibitor
1491	-0.92	BRD-K56745457	azauridine	Antiviral
1492	-0.92	BRD-K27351809	nomegestrol	Progesterone receptor agonist
1493	-0.95	BRD-A14798026	mestranol	Estrogen receptor agonist
1494	-0.95	BRD-K11696279	BU-239	Imidazoline receptor agonist
1495	-0.95	BRD-K02637541	celecoxib	Cyclooxygenase inhibitor
1496	-0.99	BRD-K33882852	ZK-93423	Benzodiazepine receptor agonist
1497	-1.02	BRD-K68392338	ZK-93426	Benzodiazepine receptor antagonist
1498	-1.02	BRD-K60174629	z-prolyl-prolinal	Prolyl endopeptidase inhibitor
1499	-1.02	BRD-A63667919	methylergometrine	Dopamine receptor antagonist
1500	-1.06	BRD-K94649603	taxifolin	Opioid receptor antagonist
1501	-1.06	BRD-A69960130	bromocriptine	Dopamine receptor agonist
1502	-1.09	BRD-A82656074	naltrindole	Opioid receptor antagonist
1503	-1.09	BRD-K38903228	hesperidin	Flavanone glycoside
1504	-1.13	BRD-A36630025	SN-38	Topoisomerase inhibitor
1505	-1.13	BRD-K70281171	U-99194	Dopamine receptor antagonist
1506	-1.13	BRD-K20287671	SU-4312	PDGFR receptor inhibitor
1507	-1.13	BRD-K59574735	ubenimex	Leukotriene inhibitor
1508	-1.13	BRD-K39111395	BCL2-inhibitor	BCL inhibitor
1509	-1.13	BRD-K32830106	guanfacine	Adrenergic receptor agonist
1510	-1.2	BRD-K97399794	quercetin	Polar auxin transport inhibitor
1511	-1.23	BRD-K89375097	pirenzepine	Acetylcholine receptor antagonist
1512	-1.27	BRD-K23583188	lavendustin-a	EGFR inhibitor
1513	-1.27	BRD-K28307902	flutamide	Androgen receptor antagonist
1514	-1.27	BRD-K67844266	MLN-4924	Nedd activating enzyme inhibitor
1515	-1.3	BRD-K01567962	pyrazolanthrone	JNK inhibitor
1516	-1.3	BRD-A51820102	econazole	Bacterial cell wall synthesis inhibitor
1517	-1.3	BRD-K47631482	bromhexine	Mucolytic agent
1518	-1.34	BRD-K50018155	RS-67506	Serotonin receptor partial agonist
1519	-1.34	BRD-K72783841	tyrphostin-AG-555	EGFR inhibitor
1520	-1.34	BRD-K36927236	glibenclamide	Sulfonylurea
1521	-1.37	BRD-K51805276	temefos	Cholinesterase inhibitor
1522	-1.41	BRD-K28863208	PNU-282987	Cholinergic receptor agonist
1523	-1.41	BRD-K94080537	diethyltoluamide	DEET activator of fly antenna ionotropic receptor IR40a
1524	-1.41	BRD-K70330367	amantadine	Glutamate receptor antagonist
1525	-1.42	BRD-A24514565	warfarin	Vitamin K antagonist
1526	-1.44	BRD-K70557564	zosuquidar	P-glycoprotein inhibitor
1527	-1.44	BRD-K61192372	capecitabine	DNA synthesis inhibitor
1528	-1.48	BRD-A95696066	nisoxetine	Norepinephrine reuptake inhibitor
1529	-1.48	BRD-K89046952	ciclacillin	Bacterial cell wall synthesis inhibitor
1530	-1.48	BRD-A70514680	articaine	Local anesthetic
1531	-1.52	BRD-A53952395	prilocaine	Local anesthetic
1532	-1.59	BRD-A17428743	BW-723C86	Serotonin receptor agonist
1533	-1.62	BRD-K84996949	sinensetin	Cyclooxygenase inhibitor
1534	-1.64	BRD-K13544237	r(-)-propylnorapomorphine	Dopamine receptor agonist
1535	-1.66	BRD-A65550283	ginsenoside	Steroid hormone receptor agonist
1536	-1.66	BRD-K73824630	skatole	Thrombin inhibitor
1537	-1.66	BRD-A47598013	citalopram	Serotonin reuptake inhibitor
1538	-1.69	BRD-K69556541	ryanodine	Calcium channel blocker
1539	-1.73	BRD-K04833372	GSK-1904529A	IGF-1 inhibitor
1540	-1.73	BRD-K92726801	hydrastinine	Haemostatic agent
1541	-1.74	BRD-A99411506	esculin	Antioxidant
1542	-1.76	BRD-K82688027	RG-13022	PDGFR receptor inhibitor
1543	-1.8	BRD-K59419204	AM-281	Cannabinoid receptor antagonist
1544	-1.87	BRD-K29359156	ebselen	H+/K+-ATPase inhibitor
1545	-1.87	BRD-K28143534	cyproheptadine	Histamine receptor antagonist
1546	-1.87	BRD-K02607075	tubocurarine	Acetylcholine receptor antagonist
1547	-1.87	BRD-K57304726	PRE-084	Sigma receptor agonist
1548	-1.87	BRD-A89175223	bisoprolol	Adrenergic receptor antagonist
1549	-1.88	BRD-K46137903	prednicarbate	Phospholipase activator
1550	-1.9	BRD-K32744045	disulfiram	Aldehyde dehydrogenase inhibitor
1551	-1.9	BRD-K27871032	lysergol	Ergoline alkaloid
1552	-1.91	BRD-A43974499	reboxetine	Adrenergic receptor antagonist
1553	-1.94	BRD-K00673382	famotidine	Histamine receptor antagonist
1554	-1.94	BRD-A56020723	CA-074-Me	Cathepsin inhibitor
1555	-1.97	BRD-K85266041	DNQX	Glutamate receptor antagonist
1556	-2.02	BRD-K16233984	eriochrome-black-t	Azo dye
1557	-2.08	BRD-K59597909	phenothiazine	Dopamine receptor antagonist
1558	-2.08	BRD-K82846253	repaglinide	Insulin secretagogue
1559	-2.09	BRD-K59273480	propentofylline	Adenosine reuptake inhibitor
1560	-2.11	BRD-A70731303	avrainvillamide-analog-5	nucleophosmin inhibitor
1561	-2.11	BRD-K93918653	quizartinib	FLT3 inhibitor
1562	-2.15	BRD-K68332390	ponalrestat	Aldose reductase inhibitor
1563	-2.15	BRD-K78599730	manumycin-a	Farnesyltransferase inhibitor
1564	-2.15	BRD-A28856712	tetryzoline	Adrenergic receptor agonist
1565	-2.15	BRD-K49448285	bisindolylmaleimide	CDK inhibitor
1566	-2.15	BRD-A29485665	bicalutamide	Androgen receptor antagonist
1567	-2.17	BRD-K12516989	zaprinast	Phosphodiesterase inhibitor
1568	-2.18	BRD-K43887077	dopamine	Dopamine receptor agonist
1569	-2.22	BRD-K97330509	SRC-kinase-inhibitor-II	SRC inhibitor
1570	-2.26	BRD-K64935403	ebelactone-b	Lipase inhibitor
1571	-2.28	BRD-K44849676	capsazepine	TRPV agonist
1572	-2.3	BRD-K20986251	lithocholic-acid	FXR antagonist
1573	-2.32	BRD-K18895904	olanzapine	Dopamine receptor antagonist
1574	-2.33	BRD-A08187463	racecadotril	Enkephalinase inhibitor
1575	-2.35	BRD-K36627727	tamibarotene	Retinoid receptor agonist
1576	-2.36	BRD-K65331431	retinyl	vitamin analog
1577	-2.36	BRD-K11399644	phenformin	AMPK activator
1578	-2.47	BRD-K83289131	CAY-10618	NAMPT inhibitor
1579	-2.5	BRD-K95851186	CGP-13501	GABA receptor modulator
1580	-2.54	BRD-A84493640	atovaquone	Mitochondrial electron transport inhibitor
1581	-2.57	BRD-K37720887	SB-525334	TGF beta receptor inhibitor
1582	-2.64	BRD-K48168960	propylthiouracil	Thyroid peroxidase inhibitor
1583	-2.68	BRD-K83988098	alvespimycin	HSP inhibitor
1584	-2.71	BRD-K93331255	lypressin	Vasopressin receptor agonist
1585	-2.71	BRD-A34208323	VU-0404997-2	Glutamate receptor modulator
1586	-2.74	BRD-K40919711	BAPTA-AM	Potassium channel blocker
1587	-2.75	BRD-K14618467	IKK-16	IKK inhibitor
1588	-2.75	BRD-K92049597	triamterene	Sodium channel blocker
1589	-2.78	BRD-K08115555	tyrphostin-AG-1288	TNF production inhibitor
1590	-2.78	BRD-K37561857	zardaverine	Phosphodiesterase inhibitor
1591	-2.83	BRD-K26117720	gingerol	Nitric oxide synthase inhibitor
1592	-2.84	BRD-A95939040	sertaconazole	Sterol demethylase inhibitor
1593	-2.89	BRD-K82091397	SB-239063	p38 MAPK inhibitor
1594	-2.96	BRD-K63792901	arecaidine	Acetylcholine receptor agonist
1595	-2.96	BRD-K93461745	buspirone	Serotonin receptor agonist
1596	-3	BRD-K32318651	acyclovir	DNA polymerase inhibitor
1597	-3.03	BRD-K19605405	ZM-241385	Adenosine receptor antagonist
1598	-3.03	BRD-K67013324	luzindole	Melatonin receptor antagonist
1599	-3.03	BRD-A85860691	chaetocin	Histone lysine methyltransferase inhibitor
1600	-3.1	BRD-K20313525	rosmarinic-acid	GABA transaminase inhibitor
1601	-3.17	BRD-K52751261	TAK-715	p38 MAPK inhibitor
1602	-3.21	BRD-K49810818	sorafenib	FLT3 inhibitor
1603	-3.21	BRD-K92817986	BJM-CSC-19	MEK inhibitor
1604	-3.21	BRD-K54411430	robustic-acid	cAMP inhibitor
1605	-3.21	BRD-A71157293	fursultiamine	Vitamin B
1606	-3.24	BRD-K59037100	oxybenzone	Lipase inhibitor
1607	-3.28	BRD-K16621777	enobosarm	Androgen receptor modulator
1608	-3.28	BRD-A77722753	hydralazine	Vasodilator
1609	-3.35	BRD-K10870738	CDC	Lipoxygenase inhibitor
1610	-3.41	BRD-K77171813	proxyfan	Histamine receptor modulator
1611	-3.42	BRD-K34776109	glimepiride	Insulin secretagogue
1612	-3.49	BRD-K02950022	BMS-299897	Gamma secretase inhibitor
1613	-3.52	BRD-A29426959	carbinoxamine	Histamine receptor antagonist
1614	-3.54	BRD-K87158025	benzamil	Sodium channel blocker
1615	-3.56	BRD-M45964048	verteporfin	Photosensitizing agent
1616	-3.56	BRD-K68143200	SA-792541	CDC inhibitor
1617	-3.59	BRD-K00959089	thenoyltrifluoroacetone	Chelating agent
1618	-3.63	BRD-K82865713	prostaglandin-b2	cAMP inhibitor
1619	-3.66	BRD-K18135438	chenodeoxycholic-acid	11-beta-HSD1 inhibitor
1620	-3.66	BRD-A67981824	cefotaxime	Bacterial cell wall synthesis inhibitor
1621	-3.67	BRD-A30655177	LFM-A13	BTK inhibitor
1622	-3.7	BRD-K51066026	aminoindazole	Ionophore
1623	-3.7	BRD-A22256192	terazosin	Adrenergic receptor antagonist
1624	-3.77	BRD-A54029483	IRL-2500	Endothelin receptor antagonist
1625	-3.85	BRD-A03216249	mepivacaine	Potassium channel blocker
1626	-3.86	BRD-A67799922	phenoxybenzamine	Adrenergic receptor antagonist
1627	-3.88	BRD-K60923938	veratridine	Sodium channel activator
1628	-3.9	BRD-K96740444	itopride	Dopamine receptor antagonist
1629	-3.91	BRD-K70301876	escitalopram	Selective serotonin reuptake inhibitor (SSRI)
1630	-3.95	BRD-K25905511	buddleoflavonoloside	Acetylcholinesterase inhibitor
1631	-3.95	BRD-K80527266	triacsin-c	Adrenergic receptor antagonist
1632	-3.99	BRD-K35377380	I-OMe-AG-538	IGF-1 inhibitor
1633	-4.02	BRD-K66874953	pifithrin-alpha	TP53 inhibitor
1634	-4.09	BRD-K30197592	5-methoxytryptamine	Serotonin receptor agonist
1635	-4.09	BRD-K77925998	quipazine	Serotonin receptor agonist
1636	-4.1	BRD-K91336023	mesulergine	Dopamine receptor agonist
1637	-4.12	BRD-K62982419	cilomilast	Phosphodiesterase inhibitor
1638	-4.12	BRD-A65615053	zacopride	Serotonin receptor antagonist
1639	-4.12	BRD-K87226815	cycloserine	Bacterial cell wall synthesis inhibitor
1640	-4.16	BRD-K02992638	lamivudine	Nucleoside reverse transcriptase inhibitor
1641	-4.19	BRD-K93645900	tadalafil	Phosphodiesterase inhibitor
1642	-4.26	BRD-K03557653	sappanone-a	Tyrosinase inhibitor
1643	-4.29	BRD-A70083328	secnidazole	Acetylcholinesterase inhibitor
1644	-4.31	BRD-A09094913	strychnine	Acetylcholine receptor antagonist
1645	-4.37	BRD-K46384212	o-3M3FBS	phospholipase activator
1646	-4.38	BRD-K13926615	vardenafil	Phosphodiesterase inhibitor
1647	-4.42	BRD-K71799949	carbamazepine	Carboxamide antiepileptic
1648	-4.48	BRD-K82561139	ricinine	Casein kinase inhibitor
1649	-4.55	BRD-K91315211	betahistine	Histamine receptor agonist
1650	-4.55	BRD-A56675431	altizide	Thiazide diuretic
1651	-4.57	BRD-A56359832	zileuton	Leukotriene inhibitor
1652	-4.57	BRD-K42221274	NNC-711	GAT inhibitor
1653	-4.62	BRD-K88679075	methandriol	Androgenic steroid
1654	-4.62	BRD-A48720949	testosterone	androgen receptor agonist
1655	-4.65	BRD-K04877770	FTase-inhibitor-B581	Farnesyltransferase inhibitor
1656	-4.66	BRD-A61392169	eliprodil	Glutamate receptor antagonist
1657	-4.69	BRD-K08640512	RS-100329	Adrenergic receptor antagonist
1658	-4.7	BRD-A77118605	BML-ST330	Phospholipase inhibitor
1659	-4.78	BRD-K61401890	deguelin	NADH-ubiquinone oxidoreductase (Complex I) inhibitor
1660	-4.79	BRD-K92678294	irilin-a	Isoflavone
1661	-4.8	BRD-K60160658	tiagabine	GABA uptake inhibitor
1662	-4.83	BRD-A59985574	topotecan	Topoisomerase inhibitor
1663	-4.86	BRD-K11540476	EMF-BCA1-64	Caspase inhibitor
1664	-4.86	BRD-A01145011	zebularine	DNA methyltransferase inhibitor
1665	-4.87	BRD-A77050075	heraclenol	Vitamin K antagonist
1666	-4.88	BRD-K59570838	homoveratrylamine	Dopamine analog
1667	-4.93	BRD-K60770992	pergolide	Dopamine receptor agonist
1668	-4.96	BRD-K99616396	motesanib	KIT inhibitor
1669	-5.07	BRD-A87719232	naproxen	Cyclooxygenase inhibitor
1670	-5.08	BRD-K67080878	milrinone	Phosphodiesterase inhibitor
1671	-5.15	BRD-K88741031	methyl-2,5-dihydroxycinnamate	EGFR inhibitor
1672	-5.17	BRD-K92138166	mammea-a	other antibiotic
1673	-5.18	BRD-K79437791	acetyl-farnesyl-cysteine	Inhibitor of methylation of endogenous isoprenylated proteins
1674	-5.18	BRD-A00100033	nifurtimox	DNA inhibitor
1675	-5.2	BRD-K47693913	evoxine	Furoquinoline alkaloid
1676	-5.21	BRD-K66876909	linezolid	Bacterial 50S ribosomal subunit inhibitor
1677	-5.31	BRD-A28105619	cucurbitacin-i	JAK inhibitor
1678	-5.34	BRD-A85280935	quinpirole	Dopamine receptor agonist
1679	-5.42	BRD-A69512159	carbidopa	Aromatic L-amino acid decarboxylase inhibitor
1680	-5.46	BRD-K99411983	lumicolchicine	Colchicine isomer, non-binder of microtubules
1681	-5.57	BRD-K32645441	dipropyl-5ct	Serotonin receptor agonist
1682	-5.57	BRD-K86301799	dipyridamole	Phosphodiesterase inhibitor
1683	-5.58	BRD-K63915849	AS-604850	PI3K inhibitor
1684	-5.6	BRD-A55756846	H-7	PKA inhibitor
1685	-5.71	BRD-K63630713	etacrynic-acid	Sodium/potassium/chloride transporter inhibitor
1686	-5.74	BRD-K08998509	fananserin	Dopamine receptor antagonist
1687	-5.74	BRD-K24994810	androstenol	GABA receptor modulator
1688	-5.74	BRD-A13122391	triptolide	RNA polymerase inhibitor
1689	-5.8	BRD-K71926323	marbofloxacin	Bacterial DNA gyrase inhibitor
1690	-5.81	BRD-K67537649	PQ-401	IGF-1 inhibitor
1691	-5.83	BRD-A27887842	prednisolone	Glucocorticoid receptor agonist
1692	-5.85	BRD-A79803969	memantine	Glutamate receptor antagonist
1693	-5.95	BRD-K84566043	fenpiverinium	Acetylcholine receptor antagonist
1694	-5.95	BRD-A91699651	chloroquine	Antimalarial
1695	-5.99	BRD-K88868628	iodoacetic-acid	Cysteine peptidase inhibitor
1696	-6.02	BRD-A42553870	L-152804	Neuropeptide receptor antagonist
1697	-6.1	BRD-K31553034	zibotentan	Endothelin receptor antagonist
1698	-6.12	BRD-K33860217	CP-94253	Serotonin receptor agonist
1699	-6.13	BRD-K62363391	dapsone	Bacterial antifolate
1700	-6.19	BRD-K64245000	GW-4064	FXR agonist
1701	-6.26	BRD-K64310881	MW-STK33-3B	Potassium channel activator
1702	-6.3	BRD-K51662849	ilomastat	Matrix metalloprotease inhibitor
1703	-6.39	BRD-K35687265	ON-01910	PLK inhibitor
1704	-6.43	BRD-A44090213	indoprofen	Cyclooxygenase inhibitor
1705	-6.54	BRD-A26384407	chlortalidone	Carbonic anhydrase inhibitor
1706	-6.69	BRD-K50495309	SRC-kinase-inhibitor-I	SRC inhibitor
1707	-6.78	BRD-A42759514	ornidazole	Antiprotozoal
1708	-6.8	BRD-K12762134	XAV-939	Tankyrase inhibitor
1709	-6.83	BRD-A47829399	artesunate	DNA synthesis inhibitor
1710	-6.86	BRD-K97564742	mepyramine	Histamine receptor antagonist
1711	-6.93	BRD-A62182663	YK-4279	Apoptosis stimulant
1712	-6.93	BRD-K89839824	raltitrexed	Thymidylate synthase inhibitor
1713	-6.97	BRD-K66956375	oleoylethanolamide	Cannabinoid receptor agonist
1714	-6.98	BRD-A46186775	hydrocortisone	Glucocorticoid receptor agonist
1715	-6.99	BRD-K00656370	6-aminochrysene	Transferase inhibitor
1716	-7.02	BRD-K62353524	DY-131	Estrogen receptor agonist
1717	-7.03	BRD-K80738081	resveratrol	Cytochrome P450 inhibitor
1718	-7.04	BRD-K20995441	U-54494A	Opioid receptor agonist
1719	-7.08	BRD-K53220666	trimetozine	Sedative
1720	-7.09	BRD-A65013509	oxybutynin	Acetylcholine receptor antagonist
1721	-7.13	BRD-K83063356	RS-102895	CCR antagonist
1722	-7.15	BRD-K77695569	tiabendazole	Angiogenesis inhibitor
1723	-7.19	BRD-K04196797	oxcarbazepine	Sodium channel blocker
1724	-7.23	BRD-K18855837	varenicline	Acetylcholine receptor agonist
1725	-7.26	BRD-A97479839	piperidolate	Acetylcholine receptor antagonist
1726	-7.4	BRD-K86003836	flubendazole	Tubulin inhibitor
1727	-7.43	BRD-K40624912	ZM-39923	JAK inhibitor
1728	-7.43	BRD-K26657438	imiquimod	TLR agonist
1729	-7.44	BRD-A92161634	scopoline	Acetylcholine receptor antagonist
1730	-7.47	BRD-K96263742	GW-7647	PPAR receptor agonist
1731	-7.48	BRD-A39290993	cyproterone	Androgen receptor antagonist
1732	-7.5	BRD-A21858158	praziquantel	Anthelmintic
1733	-7.68	BRD-K07691486	roscovitine	CDK inhibitor
1734	-7.76	BRD-K73109821	diazoxide	Potassium channel activator
1735	-7.81	BRD-A79314293	cephalosporanic-acid	Bacterial cell wall synthesis inhibitor
1736	-7.81	BRD-K55454768	TAS-301	Calcium-calmodulin dependent protein kinase inhibitor
1737	-7.89	BRD-K04993501	cefixime	Bacterial cell wall synthesis inhibitor
1738	-7.91	BRD-K70511574	sunitinib	PLK inhibitor
1739	-7.93	BRD-K40892394	AR-C133057XX	Nitric oxide synthase inhibitor
1740	-7.96	BRD-A92537424	danazol	Estrogen receptor antagonist
1741	-7.98	BRD-K88871508	lisuride	Dopamine receptor agonist
1742	-7.98	BRD-K05906022	limonin	HIV protease inhibitor
1743	-8	BRD-K79124250	ioxaglic-acid	Radiopaque medium
1744	-8.01	BRD-K63504947	semaxanib	VEGFR inhibitor
1745	-8.02	BRD-K92446736	zatebradine	HCN channel blocker
1746	-8.02	BRD-K38323065	phenacetin	Cyclooxygenase inhibitor
1747	-8.09	BRD-K86958018	olvanil	TRPV agonist
1748	-8.12	BRD-A60197193	amisulpride	Dopamine receptor antagonist
1749	-8.17	BRD-K18816859	L-694247	Serotonin receptor agonist
1750	-8.22	BRD-A41995253	brucine	Glycine receptor antagonist
1751	-8.44	BRD-K18036262	L-168049	Glucagon receptor antagonist
1752	-8.56	BRD-A59808129	guggulsterone	Cholesterol inhibitor
1753	-8.57	BRD-A43974575	tranylcypromine	Monoamine oxidase inhibitor
1754	-8.62	BRD-K34170797	fexaramine	FXR agonist
1755	-8.66	BRD-K15025317	BAY-11-7821	NFkB pathway inhibitor
1756	-8.7	BRD-K34330170	rotenonic-acid	Retinoid receptor antagonist
1757	-8.76	BRD-K94353609	fluocinolone	Glucocorticoid receptor agonist
1758	-8.77	BRD-K95309561	dienestrol	Estrogen receptor agonist
1759	-8.78	BRD-K90259198	W-7	Calmodulin antagonist
1760	-8.78	BRD-A65440446	cimaterol	Adrenergic receptor agonist
1761	-8.83	BRD-A02710418	meptazinol	Opioid receptor agonist
1762	-8.95	BRD-K22828899	TUL-XXI039	Serine/threonine kinase inhibitor
1763	-8.97	BRD-K26241953	piceatannol	SYK inhibitor
1764	-9.02	BRD-A72703248	SKF-96365	Calcium channel blocker
1765	-9.07	BRD-A04352665	maraviroc	CC chemokine receptor antagonist
1766	-9.08	BRD-K41903098	diphenoxylate	Opioid receptor agonist
1767	-9.1	BRD-K05528470	L-745870	Dopamine receptor antagonist
1768	-9.18	BRD-K70241288	L-692585	Growth hormone releasing peptide ligand agonist
1769	-9.19	BRD-K54210043	NS-1619	Calcium channel activator
1770	-9.2	BRD-K39944607	ochratoxin-a	Phenylalanyl tRNA synthetase inhibitor
1771	-9.29	BRD-K26979635	NS-3694	Glutamate receptor antagonist
1772	-9.3	BRD-K60038276	irbesartan	Angiotensin receptor antagonist
1773	-9.31	BRD-K78126613	menadione	Mitochondrial DNA polymerase inhibitor
1774	-9.33	BRD-K03670461	tyrphostin-AG-82	EGFR inhibitor
1775	-9.4	BRD-A26845397	isamoltan	Adrenergic receptor antagonist
1776	-9.41	BRD-K95992530	Cyclo-[Arg-Gly-Asp-D-Phe-Val]	integrin antagonist
1777	-9.42	BRD-K80396088	gliquidone	Sulfonylurea
1778	-9.44	BRD-K57718010	pentylenetetrazol	GABA receptor antagonist
1779	-9.48	BRD-K83144676	olmesartan	Angiotensin antagonist
1780	-9.5	BRD-A77299732	salubrinal	Eukaryotic translation initiation factor inhibitor
1781	-9.53	BRD-K00486786	RO-08-2750	NGF binding inhibitor
1782	-9.53	BRD-K34441861	moexipril	ACE inhibitor
1783	-9.56	BRD-A78360835	cercosporin	Photoactivated toxin
1784	-9.58	BRD-K91733562	secoisolariciresinol	Antioxidant
1785	-9.59	BRD-A55946879	BW-B70C	Lipoxygenase inhibitor
1786	-9.61	BRD-K91900765	VX-745	p38 MAPK inhibitor
1787	-9.66	BRD-K01192156	tyrphostin-AG-112	Protein tyrosine kinase inhibitor
1788	-9.67	BRD-K57930253	nitrazepam	Benzodiazepine receptor agonist
1789	-9.85	BRD-K67277431	picotamide	Thromboxane receptor antagonist
1790	-9.88	BRD-K33211335	dextromethorphan	Glutamate receptor antagonist
1791	-9.95	BRD-A42346008	metanephrine	Epinephrine metabolite
1792	-9.96	BRD-A98702003	carbenoxolone	11-beta-HSD1 inhibitor
1793	-10	BRD-A83431637	resmethrin	Cytochrome P450 inhibitor
1794	-10.07	BRD-K29173907	isoflupredone	Glucocorticoid receptor agonist
1795	-10.09	BRD-A96255180	ribavirin	Antiviral
1796	-10.15	BRD-K83636919	entacapone	Catechol O methyltransferase inhibitor
1797	-10.17	BRD-K06895174	cisapride	Serotonin receptor agonist
1798	-10.24	BRD-K08252256	diclofenac	Cyclooxygenase inhibitor
1799	-10.28	BRD-K53665955	MK-5108	Aurora kinase inhibitor
1800	-10.28	BRD-K24240364	GYKI-52466	Glutamate receptor antagonist
1801	-10.3	BRD-K76587808	fraxetin	Antioxidant
1802	-10.32	BRD-K46742498	alosetron	Serotonin receptor antagonist
1803	-10.32	BRD-A67373739	AICA-ribonucleotide	AMPK activator
1804	-10.34	BRD-K72264770	QW-BI-011	Histone lysine methyltransferase inhibitor
1805	-10.39	BRD-K85383046	IAA-94	Chloride channel blocker
1806	-10.45	BRD-A02189320	met-leu-phe	-666
1807	-10.47	BRD-K04430056	7-nitroindazole	nitric oxide synthase inhibitor
1808	-10.48	BRD-K15502390	nevirapine	Reverse transcriptase inhibitor
1809	-10.5	BRD-K89626439	sirolimus	MTOR inhibitor
1810	-10.5	BRD-A16700644	isoxsuprine	Adrenergic receptor agonist
1811	-10.51	BRD-K81528515	nilotinib	ABL inhibitor
1812	-10.51	BRD-K31699485	DMEOB	glutamate receptor modulator
1813	-10.56	BRD-A10355991	norketamine	Glutamate receptor antagonist
1814	-10.57	BRD-K06817181	BRD-K06817181	JAK inhibitor
1815	-10.6	BRD-K69690935	curcumin	Cyclooxygenase inhibitor
1816	-10.62	BRD-K10852020	tolcapone	Catechol O methyltransferase inhibitor
1817	-10.69	BRD-K80325895	eicosadienoic-acid	-666
1818	-10.71	BRD-K79353516	indolophenanthridine	CALY activator
1819	-10.73	BRD-A44133049	azasetron	Serotonin receptor antagonist
1820	-10.75	BRD-A59215453	lobelanidine	Acetylcholine receptor antagonist
1821	-10.9	BRD-A83326220	brazilin	Nitric oxide production inhibitor
1822	-10.93	BRD-K28120222	parthenolide	NFkB pathway inhibitor
1823	-10.98	BRD-K99946902	hexylresorcinol	Local anesthetic
1824	-11.01	BRD-A48430263	pioglitazone	Insulin sensitizer
1825	-11.02	BRD-A55393291	testosterone	Androgen receptor agonist
1826	-11.03	BRD-K81473089	tacrine	Acetylcholinesterase inhibitor
1827	-11.04	BRD-K50325075	UCL-2077	Slow after hyperpolarization channel blocker
1828	-11.04	BRD-K35941380	methysergide	Serotonin receptor antagonist
1829	-11.05	BRD-K11373525	ZD-7155	Angiotensin receptor antagonist
1830	-11.06	BRD-A23359898	sibutramine	Serotonin reuptake inhibitor
1831	-11.26	BRD-K01493881	apigenin	Casein kinase inhibitor
1832	-11.31	BRD-A37817666	picrotoxin	GABA receptor antagonist
1833	-11.32	BRD-K25310650	ormetoprim	Bacterial antifolate
1834	-11.37	BRD-K92984783	melperone	Serotonin receptor antagonist
1835	-11.4	BRD-K61951118	FG-7142	GABA benzodiazepine site receptor inverse agonist
1836	-11.45	BRD-K59851896	calycanthine	GABA release inhibitor
1837	-11.53	BRD-K37846922	3,3'-diindolylmethane	CHK inhibitor
1838	-11.58	BRD-K93325701	damnacanthal	SRC inhibitor
1839	-11.61	BRD-A18043272	phensuximide	Succinimide antiepileptic
1840	-11.63	BRD-K32107296	temozolomide	DNA alkylating agent
1841	-11.63	BRD-A72066420	mifobate	PPAR receptor antagonist
1842	-11.63	BRD-K93188295	ARC-239	Adrenergic receptor antagonist
1843	-11.69	BRD-K67017579	cilostazol	Phosphodiesterase inhibitor
1844	-11.81	BRD-A31312900	montelukast	Leukotriene receptor antagonist
1845	-11.82	BRD-K41707108	ceramide	Phosphoenolpyruvate carboxylase activator
1846	-11.83	BRD-K04853698	LDN-193189	Serine/threonine kinase inhibitor
1847	-11.93	BRD-A49906757	scopolamine	Acetylcholine receptor antagonist
1848	-11.97	BRD-K68246049	TTNPB	Retinoid receptor agonist
1849	-12.02	BRD-K23566484	nilutamide	Androgen receptor antagonist
1850	-12.06	BRD-A95445494	maackiain	Sodium/glucose cotransporter inhibitor
1851	-12.16	BRD-K56700933	phenethyl-isothiocyanate	Antineoplastic
1852	-12.17	BRD-K12079898	PD-160170	Neuropeptide receptor antagonist
1853	-12.19	BRD-K08703257	3-amino-benzamide	PARP inhibitor
1854	-12.2	BRD-K11107424	tiotidine	Histamine receptor antagonist
1855	-12.22	BRD-K82255054	propofol	GABA receptor agonist
1856	-12.27	BRD-K12932420	YM-976	Phosphodiesterase inhibitor
1857	-12.33	BRD-A54487287	cortisone	Glucocorticoid receptor agonist
1858	-12.39	BRD-K49456190	prima-1-met	thioredoxin inhibitor
1859	-12.41	BRD-K79684402	RO-10-5824	Dopamine receptor agonist
1860	-12.59	BRD-K09635314	M-3M3FBS	phospholipase activator
1861	-12.62	BRD-K11158509	tyrphostin-B44	EGFR inhibitor
1862	-12.71	BRD-K85013741	auraptene	Nitric oxide production inhibitor
1863	-12.72	BRD-K64610608	EMF-bca1-57	caspase inhibitor
1864	-12.72	BRD-K86434416	selegiline	Monoamine oxidase inhibitor
1865	-12.81	BRD-K39965020	doconexent	PPAR receptor agonist
1866	-12.82	BRD-K08502430	angiogenesis-inhibitor	Angiogenesis inhibitor
1867	-12.83	BRD-K24656285	farnesol	FXR agonist
1868	-12.89	BRD-K03440695	boldine	Acetylcholine receptor antagonist
1869	-12.89	BRD-K55677650	CO-101244	Ionotropic glutamate receptor antagonist
1870	-12.91	BRD-K34014345	naproxol	Anti-inflammatory
1871	-12.94	BRD-K63533170	AM-630	Cannabinoid receptor antagonist
1872	-12.95	BRD-A58564983	selamectin	Nematocide
1873	-12.96	BRD-K99447003	enalaprilat	ACE inhibitor
1874	-12.96	BRD-K72029282	probucol	Atherogenesis inhibitor
1875	-12.99	BRD-K83597974	pargyline	Monoamine oxidase inhibitor
1876	-12.99	BRD-K74195153	irsogladine	Phosphodiesterase inhibitor
1877	-13	BRD-K34608650	BRD-K34608650	Cannabinoid receptor agonist
1878	-13.02	BRD-K64514229	toltrazuril	Antiprotozoal
1879	-13.07	BRD-K74514084	pazopanib	KIT inhibitor
1880	-13.19	BRD-K01779529	fluoropyruvate	Pyruvate dehydrogenase kinase inhibitor
1881	-13.28	BRD-A20968261	WAY-213613	Glutamate inhibitor
1882	-13.32	BRD-A80017228	bendroflumethiazide	Sodium/potassium/chloride transporter inhibitor
1883	-13.47	BRD-K34533029	tyrphostin-AG-494	EGFR inhibitor
1884	-13.48	BRD-K46435977	valaciclovir	DNA polymerase inhibitor
1885	-13.5	BRD-A84389091	L-655708	GABA receptor inverse agonist
1886	-13.55	BRD-A36318220	necrostatin-1	RIPK inhibitor
1887	-13.59	BRD-A55416093	colforsin	Adenylyl cyclase activator
1888	-13.66	BRD-K06593056	LE-135	Retinoid receptor agonist
1889	-13.76	BRD-A41555725	chlortetracycline	Protein synthesis inhibitor
1890	-13.92	BRD-K49657628	tyrphostin-AG-18	EGFR inhibitor
1891	-14.03	BRD-K69763916	LY-341495	Glutamate receptor antagonist
1892	-14.07	BRD-K01648091	LE-300	Dopamine receptor antagonist
1893	-14.07	BRD-A51829654	BRL-15572	Serotonin receptor antagonist
1894	-14.09	BRD-K56509348	BMS-182874	Endothelin receptor antagonist
1895	-14.18	BRD-K18618618	cimetidine	Histamine receptor antagonist
1896	-14.21	BRD-A67862938	naftidrofuryl	Adrenergic receptor antagonist
1897	-14.28	BRD-A02759312	betaxolol	Adrenergic receptor antagonist
1898	-14.28	BRD-A57382968	piroxicam	Cyclooxygenase inhibitor
1899	-14.35	BRD-K54095730	CMPD-1	p38 MAPK inhibitor
1900	-14.36	BRD-K13725475	rhodomyrtoxin	Cytotoxic agent
1901	-14.4	BRD-K12120659	GR-144053	Integrin antagonist
1902	-14.45	BRD-A43150328	penicillic-acid	other antibiotic
1903	-14.48	BRD-K10670311	sulfasalazine	Antirheumatic
1904	-14.53	BRD-A47144777	dihydro-7-desacetyldeoxygedunin	HSP inhibitor
1905	-14.61	BRD-A32164164	methyllycaconitine	Acetylcholine receptor antagonist
1906	-14.61	BRD-K21350491	phenamil	TRPV antagonist
1907	-14.78	BRD-K10176267	L-701252	Glutamate receptor antagonist
1908	-14.82	BRD-K86465814	HO-013	PPAR receptor agonist
1909	-14.91	BRD-A11990600	lorazepam	Benzodiazepine receptor agonist
1910	-15.09	BRD-K67445247	flurofamide	Urease inhibitor
1911	-15.16	BRD-K05977823	tenovins	SIRT inhibitor
1912	-15.22	BRD-K07888107	depudecin	HDAC inhibitor
1913	-15.33	BRD-K17294426	clebopride	Dopamine receptor antagonist
1914	-15.39	BRD-K78659596	MLN-2238	Proteasome inhibitor
1915	-15.41	BRD-K42679050	Y-27152	Potassium channel activator
1916	-15.45	BRD-K90543092	levonorgestrel	Estrogen receptor agonist
1917	-15.49	BRD-A12016240	LY-278584	Serotonin receptor antagonist
1918	-15.53	BRD-K25906698	immepip	Histamine receptor agonist
1919	-15.58	BRD-K20152659	gamma-homolinolenic-acid	Cholesterol inhibitor
1920	-15.64	BRD-K52172416	anastrozole	Aromatase inhibitor
1921	-15.67	BRD-A28970875	puromycin	Protein synthesis inhibitor
1922	-15.79	BRD-A35511923	L-803087	Somatostatin receptor agonist
1923	-15.82	BRD-K14200658	syrosingopine	Vesicular monoamine transporter inhibitor
1924	-15.97	BRD-A14574269	UB-165	Acetylcholine receptor agonist
1925	-16.09	BRD-K40758068	efavirenz	HIV protease inhibitor
1926	-16.12	BRD-K07762753	aminopurvalanol-a	Tyrosine kinase inhibitor
1927	-16.14	BRD-A02481876	importazole	Importin-beta transport receptor inhibitor
1928	-16.2	BRD-K10136726	tosyllysyl-chloromethyl-ketone	Chymotrypsin inhibitor
1929	-16.23	BRD-K32795028	1-benzylimidazole	Thromboxane synthase inhibitor
1930	-16.32	BRD-K99545815	PF-562271	Focal adhesion kinase inhibitor
1931	-16.32	BRD-A65145453	ATPA	Glutamate receptor agonist
1932	-16.35	BRD-A38913120	BH3I-1	BCL inhibitor
1933	-16.39	BRD-K52075715	oxibendazole	Tubulin inhibitor
1934	-16.39	BRD-K11433652	aspirin	Cyclooxygenase inhibitor
1935	-16.41	BRD-K97056771	HY-11007	BCR-ABL kinase inhibitor
1936	-16.43	BRD-K50859149	sulfafurazole	Bacterial antifolate
1937	-16.49	BRD-K08973992	linoleic-acid	Oxidative stress inducer
1938	-16.5	BRD-A99177642	deltaline	Acetylcholine receptor antagonist
1939	-16.58	BRD-K41143549	BRD-K41143549	Glutamate receptor antagonist
1940	-16.63	BRD-K17868609	BRL-54443	Serotonin receptor agonist
1941	-16.64	BRD-K87991767	umbelliferone	Cyclooxygenase inhibitor
1942	-16.77	BRD-K64800655	PHA-793887	CDK inhibitor
1943	-16.82	BRD-A89672324	CGP-55845	GABA receptor antagonist
1944	-16.86	BRD-K56558538	ambroxol	Sodium channel blocker
1945	-16.87	BRD-K65285700	BRD-K65285700	Cannabinoid receptor agonist
1946	-16.93	BRD-K76205745	losartan	Angiotensin receptor antagonist
1947	-17.12	BRD-K46678324	RHO-kinase-inhibitor-II	Rho associated kinase inhibitor
1948	-17.21	BRD-K37130656	rivaroxaban	Coagulation inhibitor
1949	-17.21	BRD-K68095457	palmitoylethanolamide	Cannabinoid receptor agonist
1950	-17.25	BRD-A43882281	pinacidil	ATP channel activator
1951	-17.26	BRD-A21723284	naltriben	Opioid receptor antagonist
1952	-17.28	BRD-K13356952	methazolamide	Carbonic anhydrase inhibitor
1953	-17.44	BRD-K54472332	elvitegravir	HIV integrase inhibitor
1954	-17.57	BRD-K72726508	arcyriaflavin-a	CDK inhibitor
1955	-17.72	BRD-A74667430	etodolac	Cyclooxygenase inhibitor
1956	-17.85	BRD-K64746805	MBCQ	Phosphodiesterase inhibitor
1957	-17.97	BRD-K35498378	alrestatin	Aldose reductase inhibitor
1958	-18.05	BRD-K23913458	coumarin	Vitamin K antagonist
1959	-18.14	BRD-U94846492	quinine	Hemozoin biocrystallization inhibitor
1960	-18.23	BRD-K59650319	YM-298198	Glutamate receptor antagonist
1961	-18.31	BRD-K38477985	malonoben	Protein tyrosine kinase inhibitor
1962	-18.37	BRD-K16336526	capsaicin	TRPV agonist
1963	-18.47	BRD-K55591206	epigallocatechin	Nitric oxide synthase inhibitor
1964	-18.58	BRD-A17819071	gedunin	HSP inhibitor
1965	-18.63	BRD-K24675965	LY-288513	CCK receptor antagonist
1966	-18.63	BRD-K62736196	guanabenz	-666
1967	-18.75	BRD-K63979671	etifenin	Compound used in hepatobiliary scans of the liver
1968	-18.77	BRD-A78377521	monastrol	Kinesin-like spindle protein inhibitor
1969	-18.8	BRD-A97739905	ketoprofen	Cyclooxygenase inhibitor
1970	-18.81	BRD-A39268308	epibatidine	Acetylcholine receptor agonist
1971	-18.95	BRD-K11634954	GBR-13069	Dopamine uptake inhibitor
1972	-18.99	BRD-K15842202	eudesmic-acid	-666
1973	-19	BRD-A62434282	goserelin	Gonadotropin releasing factor hormone receptor agonist
1974	-19.02	BRD-A41722204	sulmazole	Adenosine receptor antagonist
1975	-19.04	BRD-A33833419	TER-14687	Inhibitor of translocation of PKCq in T cells
1976	-19.08	BRD-K36324071	NF-449	Purinergic receptor antagonist
1977	-19.09	BRD-A61793559	metolazone	Carbonic anhydrase inhibitor
1978	-19.09	BRD-K21520694	sulfacetamide	PABA antagonist
1979	-19.26	BRD-K29582677	flunarizine	Calcium channel blocker
1980	-19.34	BRD-M47937986	cefatrizine	Bacterial cell wall synthesis inhibitor
1981	-19.44	BRD-K33396764	alpha-linolenic-acid	Omega 3 fatty acid stimulant
1982	-19.46	BRD-K82746043	navitoclax	BCL inhibitor
1983	-19.5	BRD-K83322645	L-693403	Sigma receptor agonist
1984	-19.52	BRD-A55594068	vinblastine	Microtubule inhibitor
1985	-19.55	BRD-K98763141	niflumic-acid	Cyclooxygenase inhibitor
1986	-19.73	BRD-A62071884	siguazodan	Phosphodiesterase inhibitor
1987	-19.75	BRD-K53570330	carbofuran	Cholinesterase inhibitor
1988	-19.78	BRD-K40213712	SAL-1	Adenosine receptor antagonist
1989	-19.83	BRD-K16406336	methylene-blue	Guanylyl cyclase inhibitor
1990	-19.88	BRD-A06352508	SB-218078	CHK inhibitor
1991	-19.94	BRD-A15435692	BMY-14802	Sigma receptor antagonist
1992	-19.96	BRD-K57886322	fluocinonide	Glucocorticoid receptor agonist
1993	-20.04	BRD-K54314721	zolmitriptan	Serotonin receptor agonist
1994	-20.1	BRD-K01815685	indole	aryl hydrocarbon receptor agonist
1995	-20.33	BRD-K38055836	etamivan	Respiratory stimulant
1996	-20.4	BRD-A24122750	saclofen	GABA receptor antagonist
1997	-20.43	BRD-A75517195	thiazolopyrimidine	CDC inhibitor
1998	-20.5	BRD-K71731651	PNU-120596	Acetylcholine receptor agonist
[truncated: 431 more rows]
